# Supplementary material for: Health-Related Physical Fitness Evaluation in HIV-Diagnosed Children and Adolescents: A Scoping Review
Source: MDPI journal article supplement (doi:10.3390/ijerph21050541), 2024-04-25
Supplement: s1 [file s1]

## SEARCH STRATEGY

### DATABASES

- 1 - Cochrane
- 2 - MEDLINE (via PubMed)
- 3 - EMBASE (via Ovid)
- 4 - Web of Science
- 5 - SportDiscus (via EBSCOhost)
- 6 - LILACS (via BVS)
- 7 - Scopus
- 8 - SciELO
- 9 - Science Direct
- 10 – CINAHL

### DESCRIPTORS

**First block (concept)** – Health-related physical fitness components (cardiorespiratory fitness; muscle strength; body composition and flexibility).

#### *Cardiorespiratory fitness*

“cardiorespiratory fitness”; “oxygen consumption”; “aerobic capacity”; “aerobic fitness”; “cardiorespiratory capacity”; “cardiovascular fitness”; “aerobic power”; “aerobic endurance”; “cardiorespiratory endurance”; “maximum oxygen consumption”; “maximal oxygen uptake”; “VO<sub>2</sub> maximal”;

#### *Muscle strength*

"muscle strength"; "muscle contraction"; "isometric contraction"; "isotonic contraction"; "resistance training"; "muscular power"; “endurance training”; "upper limb strength"; "lower limb strength"; "muscular endurance"; "musculoskeletal fitness"; "muscular fitness"; “explosive strength”;

#### *Body composition*

“body composition”; “body composition analysis”; “adipose tissue”; “bone density”; “bone mass”; “mineral mass”; “fat mass”; “fat free mass”; “lean body mass”; “functional body composition”;

#### *Flexibility*

“flexibility”; “range of motion”; “muscle stretching exercises”;

**Second block (context)** - HIV infection diagnosis.

“HIV infections”; “HIV”; “human immunodeficiency virus”; “HIV seropositivity”; “HIV testing”; “acquired immunodeficiency syndrome”; “AIDS”;

**Third block (population)** - Children and adolescents (5 to 19 years old).

“child”; “children”; “adolescent”; “adolescents”; “youth”; “young”; “teen”; “teenager”; “preschool child”; “boys”; “girls”; “pediatric”;

## Search strategy for each database

1 - Cochrane (<https://www.cochranelibrary.com/advanced-search>)

- Start: 05/01/2024 End: 05/01/2024
- Total: 601 (Trials)

*Filters: All Text; Trials*

((("physical fitness" OR "health-related physical fitness" OR "cardiorespiratory fitness" OR "oxygen consumption" OR "aerobic capacity" OR "aerobic fitness" OR "cardiorespiratory capacity" OR "cardiovascular fitness" OR "aerobic power" OR "aerobic endurance" OR "cardiorespiratory endurance" OR "maximum oxygen consumption" OR "maximal oxygen uptake" OR "VO2 maximal" OR "muscle strength" OR "muscle contraction" OR "isometric contraction" OR "isotonic contraction" OR "resistance training" OR "muscular power" OR "endurance training" OR "upper limb strength" OR "lower limb strength" OR "muscular endurance" OR "musculoskeletal fitness" OR "muscular fitness" OR "explosive strength" OR "body composition" OR "body composition analysis" OR "adipose tissue" OR "bone density" OR "bone mass" OR "mineral mass" OR "fat mass" OR "fat free mass" OR "lean body mass" OR "functional body composition" OR flexibility OR "range of motion" OR "muscle stretching exercises")) AND (("HIV infections" OR HIV OR "human immunodeficiency virus" OR "HIV seropositivity" OR "HIV testing" OR "acquired immunodeficiency syndrome" OR AIDS)) AND ((child OR children OR adolescent OR adolescents OR youth OR young OR teen OR teenager OR "preschool child" OR boys OR girls OR pediatric))

2 - MEDLINE (via PubMed) (<https://pubmed.ncbi.nlm.nih.gov/advanced/>)

- Start: 05/01/2024 End: 05/01/2024
- Total: 1.198

*Filters: None.*

((("physical fitness" OR "health-related physical fitness" OR "cardiorespiratory fitness" OR "oxygen consumption" OR "aerobic capacity" OR "aerobic fitness" OR "cardiorespiratory capacity" OR "cardiovascular fitness" OR "aerobic power" OR "aerobic endurance" OR "cardiorespiratory endurance" OR "maximum oxygen consumption" OR "maximal oxygen uptake" OR "VO2 maximal" OR "muscle strength" OR "muscle contraction" OR "isometric contraction" OR "isotonic contraction" OR "resistance training" OR "muscular power" OR "endurance training" OR "upper limb strength" OR "lower limb strength" OR "muscular endurance" OR "musculoskeletal fitness" OR "muscular fitness" OR "explosive strength" OR "body composition" OR "body composition analysis" OR "adipose tissue" OR "bone density" OR "bone mass" OR "mineral mass" OR "fat mass" OR "fat free mass" OR "lean body mass" OR "functional body composition" OR "flexibility" OR "range of motion" OR "muscle stretching exercises") AND ("HIV infections" OR "HIV" OR "human immunodeficiency virus" OR "HIV seropositivity" OR "HIV testing" OR "acquired immunodeficiency syndrome" OR "AIDS")) AND ("child" OR "children" OR "adolescent" OR "adolescents" OR "youth" OR "young" OR "teen" OR "teenager" OR "preschool child" OR "boys" OR "girls" OR "pediatric"))

3 - EMBASE (via Ovid) (<https://www.embase.com/#advancedSearch/default>)

- Start: 05/01/2024 End: 05/01/2024
- Total: 848

*Filters:* [embase]/lim NOT ([embase]/lim AND [medline]/lim).

('physical fitness'/exp OR 'physical fitness' OR 'health-related physical fitness' OR 'cardiorespiratory fitness'/exp OR 'cardiorespiratory fitness' OR 'oxygen consumption'/exp OR 'oxygen consumption' OR 'aerobic capacity'/exp OR 'aerobic capacity' OR 'aerobic fitness'/exp OR 'aerobic fitness' OR 'cardiorespiratory capacity' OR 'cardiovascular fitness'/exp OR 'cardiovascular fitness' OR 'aerobic power'/exp OR 'aerobic power' OR 'aerobic endurance' OR 'cardiorespiratory endurance'/exp OR 'cardiorespiratory endurance' OR 'maximum oxygen consumption'/exp OR 'maximum oxygen consumption' OR 'maximal oxygen uptake'/exp OR 'maximal oxygen uptake' OR 'vo2 maximal' OR 'muscle strength'/exp OR 'muscle strength' OR 'muscle contraction'/exp OR 'muscle contraction' OR 'isometric contraction'/exp OR 'isometric contraction' OR 'isotonic contraction'/exp OR 'isotonic contraction' OR 'resistance training'/exp OR 'resistance training' OR 'muscular power'/exp OR 'muscular power' OR 'endurance training'/exp OR 'endurance training' OR 'upper limb strength' OR 'lower limb strength'/exp OR 'lower limb strength' OR 'muscular endurance' OR 'musculoskeletal fitness' OR 'muscular fitness'/exp OR 'muscular fitness' OR 'explosive strength' OR 'body composition'/exp OR 'body composition' OR 'body composition analysis' OR 'adipose tissue'/exp OR 'adipose tissue' OR 'bone density'/exp OR 'bone density' OR 'bone mass'/exp OR 'bone mass' OR 'mineral mass' OR 'fat mass'/exp OR 'fat mass' OR 'fat free mass'/exp OR 'fat free mass' OR 'lean body mass'/exp OR 'lean body mass' OR 'functional body composition' OR 'flexibility'/exp OR 'flexibility' OR 'range of motion'/exp OR 'range of motion' OR 'muscle stretching exercises'/exp OR 'muscle stretching exercises') AND ('hiv infections' OR 'hiv' OR 'human immunodeficiency virus' OR 'hiv seropositivity' OR 'hiv testing' OR 'acquired immunodeficiency syndrome' OR 'aids') AND ('child' OR 'children' OR 'adolescent' OR 'adolescents' OR 'youth' OR 'young' OR 'teen' OR 'teenager' OR 'preschool child' OR 'boys' OR 'girls' OR 'pediatric') AND [embase]/lim NOT ([embase]/lim AND [medline]/lim)

#### 4 - Web of Science

(<https://www-webofscience.ez46.periodicos.capes.gov.br/wos/woscc/basic-search>)

- Start: 05/01/2024 End: 05/01/2024
- Total: 1046

*Filters: None.*

((ALL=("physical fitness" OR "health-related physical fitness" OR "cardiorespiratory fitness" OR "oxygen consumption" OR "aerobic capacity" OR "aerobic fitness" OR "cardiorespiratory capacity" OR "cardiovascular fitness" OR "aerobic power" OR "aerobic endurance" OR "cardiorespiratory endurance" OR "maximum oxygen consumption" OR "maximal oxygen uptake" OR "VO2 maximal" OR "muscle strength" OR "muscle contraction" OR "isometric contraction" OR "isotonic contraction" OR "resistance training" OR "muscular power" OR "endurance training" OR "upper limb strength" OR "lower limb strength" OR "muscular endurance" OR "musculoskeletal fitness" OR "muscular fitness" OR "explosive strength" OR "body composition" OR "body composition analysis" OR "adipose tissue" OR "bone density" OR "bone mass" OR "mineral mass" OR "fat mass" OR "fat free mass" OR "lean body mass" OR "functional body composition" OR "flexibility" OR "range of motion" OR "muscle stretching exercises")) AND ALL=("HIV infections" OR "HIV" OR "human immunodeficiency virus" OR "HIV seropositivity" OR "HIV testing" OR "acquired immunodeficiency syndrome" OR "AIDS")) AND ALL=("child" OR "children" OR "adolescent" OR "adolescents" OR "youth" OR "young" OR "teen" OR "teenager" OR "preschool child" OR "boys" OR "girls" OR "pediatric"))

5 - SportDiscus (via EBSCOhost)

(<https://web-p-ebSCOhost.ez46.periodicos.capes.gov.br/ehost/search/basic?vid=0&sid=7f93a08b-1892-43f3-bac9-0e762a94d9ef%40redis>)

- Start: 05/01/2024 End: 05/01/2024
- Total: 358

*Filters: (Expanders - Apply equivalent subjects; Search Modes - Boolean/Phrase).*

TX ( ("physical fitness") OR ("health-related physical fitness") OR ("cardiorespiratory fitness") OR ("oxygen consumption") OR ("aerobic capacity") OR ("aerobic fitness") OR ("cardiorespiratory capacity") OR ("cardiovascular fitness") OR ("aerobic power") OR ("aerobic endurance") OR ("cardiorespiratory endurance") OR ("maximum oxygen consumption") OR ("maximal oxygen uptake") OR ("VO2 maximal") OR ("muscle strength") OR ("muscle contraction") OR ("isometric contraction") OR ("isotonic contraction") OR ("resistance training") OR ("muscular power") OR ("endurance training") OR ("upper limb strength") OR ("lower limb strength") OR ("muscular endurance") OR ("musculoskeletal fitness") OR ("muscular fitness") OR ("explosive strength") OR ("body composition") OR ("body composition analysis") OR ("adipose tissue") OR ("bone density") OR ("bone mass") OR ("mineral mass") OR ("fat mass") OR ("fat free mass") OR ("lean body mass") OR ("functional body composition") OR ("flexibility") OR ("range of motion") OR ("muscle stretching exercises") ) AND ( ("HIV infections") OR ("HIV") OR ("human immunodeficiency virus") OR ("HIV seropositivity") OR ("HIV testing") OR ("acquired immunodeficiency syndrome") OR ("AIDS") ) AND ( ("child") OR ("children") OR ("adolescent") OR ("adolescents") OR ("youth") OR ("young") OR ("teen") OR ("teenager") OR ("preschool child") OR ("boys") OR ("girls") OR ("pediatric") )

6 - LILACS (via BVS) <https://bvsalud.org/>

- Start: 05/01/2024 End: 05/01/2024
- Total: 93

*Filters: Title, Summary, Subject; LILACS database.*

### English

((("physical fitness" OR "health-related physical fitness" OR "cardiorespiratory fitness" OR "oxygen consumption" OR "aerobic capacity" OR "aerobic fitness" OR "cardiorespiratory capacity" OR "cardiovascular fitness" OR "aerobic power" OR "aerobic endurance" OR "cardiorespiratory endurance" OR "maximum oxygen consumption" OR "maximal oxygen uptake" OR "VO2 maximal") OR ("muscle strength" OR "muscle contraction" OR "isometric contraction" OR "isotonic contraction" OR "resistance training" OR "muscular power" OR "endurance training" OR "upper limb strength" OR "lower limb strength" OR "muscular endurance" OR "musculoskeletal fitness" OR "muscular fitness" OR "explosive strength") OR ("body composition" OR "body composition analysis" OR "adipose tissue" OR "bone density" OR "bone mass" OR "mineral mass" OR "fat mass" OR "fat free mass" OR "lean body mass" OR "functional body composition") OR (flexibility OR "range of motion" OR "muscle stretching exercises")) AND ("HIV infections" OR HIV OR "human immunodeficiency virus" OR "HIV seropositivity" OR "HIV testing" OR "acquired immunodeficiency syndrome" OR AIDS) AND (child OR children OR adolescent OR adolescents OR youth OR young OR teen OR teenager OR "preschool child" OR boys OR girls OR pediatric))

### Portuguese

((("aptidão física") OR ("aptidão física relacionada a saúde") OR ("aptidão cardiorrespiratória") OR ("consumo de oxigênio") OR ("capacidade aeróbica") OR ("aptidão aeróbica") OR ("capacidade cardiorrespiratória") OR ("aptidão cardiovascular") OR ("potência aeróbica") OR ("resistência aeróbica") OR ("resistência cardiovascular") OR ("consumo máximo de oxigênio") OR ("absorção máxima de oxigênio") OR ("VO2 máximo"))) OR ("força muscular") OR ("contração muscular") OR ("contração isométrica") OR ("contração isotônica") OR ("treinamento resistido") OR ("potência muscular") OR ("treinamento resistido") OR ("força de membros superiores") OR ("força de membros inferiores") OR ("resistência muscular") OR ("aptidão musculoesquelética") OR ("aptidão muscular") OR ("força explosiva")) OR ("composição corporal") OR ("análise da composição corporal") OR ("tecido adiposo") OR ("densidade óssea") OR ("massa óssea") OR ("massa mineral óssea") OR ("gordura corporal") OR ("massa livre de gordura") OR ("massa magra") OR ("composição corporal funcional")) OR ((flexibilidade) OR ("amplitude de movimento") OR ("exercícios de alongamento muscular")))) AND ((("infecção por HIV") OR (HIV) OR ("vírus da imunodeficiência humana") OR ("HIV soropositivo") OR ("diagnóstico de HIV") OR ("síndrome da imunodeficiência adquirida") OR (AIDS)) AND ((criança) OR (crianças) OR (adolescente) OR (adolescentes) OR (jovens) OR (jovem) OR ("pré-escolares") OR (meninos) OR (meninas) OR (população pediátrica)))

### Spanish

((("aptitud física") OR ("aptitud física relacionada con la salud") OR ("aptitud cardiorrespiratoria") OR ("consumo de oxígeno") OR ("capacidad aeróbica") OR ("aptitud aeróbica") OR ("capacidad cardiorrespiratoria") OR ("capacidad cardiovascular") OR ("potencia aeróbica") OR ("resistencia aeróbica") OR ("resistencia cardiovascular") OR ("consumo máximo de oxígeno") OR ("consumo máximo de oxígeno") OR ("VO2 max"))) OR ("fuerza muscular") OR ("contracción muscular") OR ("contracción isométrica") OR ("contracción isotónica") OR ("entrenamiento de resistencia") OR ("fuerza muscular") OR ("entrenamiento de resistencia") OR ("fuerza de miembros superiores") OR ("fuerza de miembros inferiores") OR ("resistencia muscular") OR ("aptitud musculoesquelética") OR ("aptitud muscular") OR ("fuerza explosiva")) OR ((("composición corporal") OR ("análisis de la

composición corporal") OR ("tejido adiposo") OR ("densidad ósea") OR ("masa ósea") OR ("masa mineral ósea") OR ("grasa corporal") OR ("masa sin grasa") OR ("masa magra") OR ("composición corporal funcional")) OR ((flexibilidad) OR ("rango de movimiento") OR ("ejercicios de estiramiento muscular")) AND (("infección por VIH") OR (VIH) OR ("virus de la inmunodeficiencia humana") OR ("VIH seropositivo") OR ("diagnóstico de VIH") OR ("síndrome de inmunodeficiencia adquirida") OR (SIDA)) AND ((niño) OR (niños) OR (adolescente) OR (adolescentes) OR (jóvenes) OR ("preescolares") OR (niños) OR (niñas) OR (población pediátrica))



## 7 - Scopus

(<https://www-scopus.ez46.periodicos.capes.gov.br/search/form.uri?display=basic#basic>)

- Start: 05/01/2024 End: 05/01/2024
- Total: 1615

*Filters:* TITLE-ABS-KEY.

TITLE-ABS-KEY (( "physical fitness" OR "health-related physical fitness" OR "cardiorespiratory fitness" OR "oxygen consumption" OR "aerobic capacity" OR "aerobic fitness" OR "cardiorespiratory capacity" OR "cardiovascular fitness" OR "aerobic power" OR "aerobic endurance" OR "cardiorespiratory endurance" OR "maximum oxygen consumption" OR "maximal oxygen uptake" OR "VO2 maximal" OR "muscle strength" OR "muscle contraction" OR "isometric contraction" OR "isotonic contraction" OR "resistance training" OR "muscular power" OR "endurance training" OR "upper limb strength" OR "lower limb strength" OR "muscular endurance" OR "musculoskeletal fitness" OR "muscular fitness" OR "explosive strength" OR "body composition" OR "body composition analysis" OR "adipose tissue" OR "bone density" OR "bone mass" OR "mineral mass" OR "fat mass" OR "fat free mass" OR "lean body mass" OR "functional body composition" OR flexibility OR "range of motion" OR "muscle stretching exercises" ) AND ( "HIV infections" OR hiv OR "human immunodeficiency virus" OR "HIV seropositivity" OR "HIV testing" OR "acquired immunodeficiency syndrome" OR aids ) AND ( child OR children OR adolescent OR adolescents OR youth OR young OR teen OR teenager OR "preschool child" OR boys OR girls OR pediatric ))

8 - SciELO (<https://scielo.org/>)

- Start: 05/01/2024 End: 05/01/2024

- Total: 59

*Filters: None.*

#### English

((physical fitness) OR (health-related physical fitness) OR (cardiorespiratory fitness) OR (oxygen consumption) OR (aerobic capacity) OR (aerobic fitness) OR (cardiorespiratory capacity) OR (cardiovascular fitness) OR (aerobic power) OR (aerobic endurance) OR (cardiorespiratory endurance) OR (maximum oxygen consumption) OR (maximal oxygen uptake) OR (VO2 maximal) OR (muscle strength) OR (muscle contraction) OR (isometric contraction) OR (isotonic contraction) OR (resistance training) OR (muscular power) OR (endurance training) OR (upper limb strength) OR (lower limb strength) OR (muscular endurance) OR (musculoskeletal fitness) OR (muscular fitness) OR (explosive strength) OR (body composition) OR (body composition analysis) OR (adipose tissue) OR (bone density) OR (bone mass) OR (mineral mass) OR (fat mass) OR (fat free mass) OR (lean body mass) OR (functional body composition) OR (flexibility) OR (range of motion) OR (muscle stretching exercises)) AND ((HIV infections) OR (HIV) OR (human immunodeficiency virus) OR (HIV seropositivity) OR (HIV testing) OR (acquired immunodeficiency syndrome) OR (AIDS)) AND ((child) OR (children) OR (adolescent) OR (adolescents) OR (youth) OR (young) OR (teen) OR (teenager) OR (preschool child) OR (boys) OR (girls) OR (pediatric))

#### Portuguese

((aptidão física) OR (aptidão física relacionada a saúde) OR (aptidão cardiorrespiratória) OR (consumo de oxigênio) OR (capacidade aeróbica) OR (aptidão aeróbica) OR (capacidade cardiorrespiratória) OR (aptidão cardiovascular) OR (potência aeróbica) OR (resistência aeróbica) OR (resistência cardiovascular) OR (consumo máximo de oxigênio) OR (absorção máxima de oxigênio) OR (VO2 máximo) OR (força muscular) OR (contração muscular) OR (contração isométrica) OR (contração isotônica) OR (treinamento resistido) OR (potência muscular) OR (treinamento resistido) OR (força de membros superiores) OR (força de membros inferiores) OR (resistência muscular) OR (aptidão musculoesquelética) OR (aptidão muscular) OR (força explosiva) OR (composição corporal) OR (análise da composição corporal) OR (tecido adiposo) OR (densidade óssea) OR (massa óssea) OR (massa mineral óssea) OR (gordura corporal) OR (massa livre de gordura) OR (massa magra) OR (composição corporal funcional) OR (flexibilidade) OR (amplitude de movimento) OR (exercícios de alongamento muscular)) AND ((infecção por HIV) OR (HIV) OR (vírus da imunodeficiência humana) OR (HIV soropositivo) OR (diagnóstico de HIV) OR (síndrome da imunodeficiência adquirida) OR (AIDS)) AND ((criança) OR (crianças) OR (adolescente) OR (adolescentes) OR (jovens) OR (jovem) OR (pré-escolares) OR (meninos) OR (meninas) OR (população pediátrica))

#### Spanish

((aptitud física relacionada con la salud) OR (aptitud física) OR (aptitud cardiorrespiratoria) OR (consumo de oxígeno) OR (capacidad aeróbica) OR (aptitud aeróbica) OR (capacidad cardiorrespiratoria) OR (capacidad cardiovascular) OR (potencia aeróbica) OR (resistencia aeróbica) OR (resistencia cardiovascular) OR (consumo máximo de oxígeno) OR (consumo máximo de oxígeno) OR (VO2 max) OR (fuerza muscular) OR (contracción muscular) OR (contracción isométrica) OR (contracción isotónica) OR (entrenamiento de resistencia) OR (fuerza muscular) OR (entrenamiento de resistencia) OR (fuerza de miembros superiores) OR (fuerza de miembros inferiores) OR (resistencia muscular) OR (aptitud musculo esquelética) OR (aptitud muscular) OR (fuerza explosiva) OR (composición corporal) OR (análisis de la composición corporal) OR (tejido

adiposo) OR (densidad ósea) OR (masa ósea) OR (masa mineral ósea) OR (grasa corporal) OR (masa sin grasa) OR (masa magra) OR (composición corporal funcional) OR (flexibilidad) OR (rango de movimiento) OR (ejercicios de estiramiento muscular)) AND ((infección por VIH) OR (VIH) OR (virus de la inmunodeficiencia adquirida) OR (VIH seropositivo) OR (diagnóstico de VIH) OR (síndrome de inmunodeficiencia adquirida) OR (SIDA)) AND ((niño) OR (niños) OR (adolescente) OR (adolescentes) OR (jóvenes) OR (preescolares) OR (niños) OR (niñas) OR (población pediátrica))

9 - Science Direct (<https://www-sciencedirect.ez46.periodicos.capes.gov.br/search>)

- Start: 05/01/2024 End: 05/01/2024
- Total: 1183

*Filters: "Research articles"*

("health related physical fitness" OR "cardiorespiratory fitness" OR "muscle strength" OR "body composition analysis" OR "Range of Motion", Articular") AND ("HIV" OR "AIDS") AND ("children" OR "adolescents")

10 - CINAHL

([https://web-s-](https://web-s-ebSCOhost.ez46.periodicos.capes.gov.br/ehost/search/advanced?vid=24&sid=b165b3b0-01a4-4f7f-8c7d-91d98f0906a8%40redis)

[ebSCOhost.ez46.periodicos.capes.gov.br/ehost/search/advanced?vid=24&sid=b165b3b0-01a4-4f7f-8c7d-91d98f0906a8%40redis](https://web-s-ebSCOhost.ez46.periodicos.capes.gov.br/ehost/search/advanced?vid=24&sid=b165b3b0-01a4-4f7f-8c7d-91d98f0906a8%40redis))

- Start: 05/01/2024 End: 05/01/2024
- Total: 544

*Filters: (Expanders - Apply equivalent subjects; Search Modes - Boolean/Phrase)*

TX ( ("physical fitness") OR ("health-related physical fitness") OR ("cardiorespiratory fitness") OR ("oxygen consumption") OR ("aerobic capacity") OR ("aerobic fitness") OR ("cardiorespiratory capacity") OR ("cardiovascular fitness") OR ("aerobic power") OR ("aerobic endurance") OR ("cardiorespiratory endurance") OR ("maximum oxygen consumption") OR ("maximal oxygen uptake") OR ("VO2 maximal") OR ("muscle strength") OR ("muscle contraction") OR ("isometric contraction") OR ("isotonic contraction") OR ("resistance training") OR ("muscular power") OR ("endurance training") OR ("upper limb strength") OR ("lower limb strength") OR ("muscular endurance") OR ("musculoskeletal fitness") OR ("muscular fitness") OR ("explosive strength") OR ("body composition") OR ("body composition analysis") OR ("adipose tissue") OR ("bone density") OR ("bone mass") OR ("mineral mass") OR ("fat mass") OR ("fat free mass") OR ("lean body mass") OR ("functional body composition") OR ("flexibility") OR ("range of motion") OR ("muscle stretching exercises") ) AND ( ("HIV infections") OR ("HIV") OR ("human immunodeficiency virus") OR ("HIV seropositivity") OR ("HIV testing") OR ("acquired immunodeficiency syndrome") OR ("AIDS") ) AND ( ("child") OR ("children") OR ("adolescent") OR ("adolescents") OR ("youth") OR ("young") OR ("teen") OR ("teenager") OR ("preschool child") OR ("boys") OR ("girls") OR ("pediatric") )

**Supplementary Table S1.** Publication year, first author, country, design, purpose, and participants of the studies included in the scoping review.

| N° | Year | First Author | Country       | Study design                       | Study purpose                                                                                                                                                                                                 | Groups       | Sample size             | Sex                          | Age in years (SD)                                |
|----|------|--------------|---------------|------------------------------------|---------------------------------------------------------------------------------------------------------------------------------------------------------------------------------------------------------------|--------------|-------------------------|------------------------------|--------------------------------------------------|
| 1  | 1995 | Miller       | United States | Analytic Intervention              | To determine whether enteral supplementation with gastrostomy tubes improved weight, height, lean body mass, fat mass, immunologic parameters, length of hospital stay, and survival of HIV-infected children | HIV+         | 23 HIV+                 | 14 F<br>25 M                 | 2.6 (0.38)                                       |
| 2  | 1995 | Saavedra     | United States | Analytic Case-control              | To describe and to evaluate the longitudinal growth of children born to mothers with HIV                                                                                                                      | HIV+<br>HIV- | 59 HIV+<br><br>50 HIV-  | 33 F<br>26 M<br>25 F<br>25 M | >2.0 (NR)                                        |
| 3  | 1996 | Arpadi       | United States | Descriptive Method Validity        | To evaluate the ability of standard BIA equations to predict total body water and fat free mass in children with HIV                                                                                          | HIV+         | 20 HIV+                 | 11 F<br>9 M                  | 6.5 (2.3)                                        |
| 4  | 1997 | Miller       | United States | Descriptive Correlational          | To analyze the relation of nutritional status to cardiac muscle mass and function in HIV-infected children                                                                                                    | HIV+         | 36 HIV+                 | 17 F<br>19 M                 | 2.8 (NR)                                         |
| 5  | 1998 | Arapadi      | United States | Analytic Case-control              | To characterize the body composition of children with HIV                                                                                                                                                     | HIV+<br>HIV- | 34 HIV+<br><br>52 HIV-  | 17 F<br>17 M<br>30 F<br>22 M | 6.8 (2.2)<br>6.8 (2.4)<br>7.9 (1.7)<br>8.4 (2.9) |
| 6  | 1998 | Henderson    | United States | Analytic Case-control              | To determine whether alterations in body composition, resting energy expenditure and dietary intake are associated with growth retardation in HIV-infected children                                           | HIV+<br>HIV- | 32 HIV+<br><br>10 HIV-  | 15 F<br>17 M<br>4 F<br>6 M   | 6.5 (1.7)<br>6.7 (2.3)<br>7.1 (2.8)              |
| 7  | 1999 | Fontana      | Italy         | Analytic Case-control              | To study FFM in a large group of HIV-infected children and its correlation with the different stages of illness and with survival                                                                             | HIV+<br>HIV- | 86 HIV+<br><br>113 HIV- | 50 F<br>36 M<br>63 F<br>50 M | 6.9 (3.1)<br><br>7.7 (3.3)                       |
| 8  | 1999 | Fox-Wheeler  | United States | Analytic Open label Clinical trial | To determine the safety and efficacy of anabolic therapy to prevent or reverse wasting and malnutrition in HIV-infected pediatric patients                                                                    | HIV+         | 10 HIV+                 | 4 F<br>6 M                   | (4 to14)<br>(7 to12)                             |
| 9  | 2000 | Arpadi       | United States | Descriptive Correlational          | To assess the relationships among HIV replication, energy balance, body composition and growth in children with HIV-associated growth failure                                                                 | HIV+         | 42 HIV+                 | 24 F<br>18 M                 | 8.3 (2.4)                                        |
| 10 | 2000 | Fiore        | Italy         | Analytic Observational             | To determine changes in nutritional status based on body weight, height and nutritional habits, of HIV-infected children receiving ART                                                                        | HIV+         | 25 HIV+                 | 11 F<br>14 M                 | 7.7 (3.8)                                        |
| 11 | 2000 | Heller       | United States | Descriptive Method Validity        | To produce a simple and effective instrument to evaluate and monitor the nutritional risk of children HIV infected                                                                                            | HIV+         | 39 HIV+                 | 20 F<br>19 M                 | 8 (NR)                                           |
| 12 | 2000 | Jansen       | Brazil        | Analytic Case-control              | To evaluate the nutritional status of children with HIV                                                                                                                                                       | HIV+<br>HIV- | 36 HIV+<br><br>36 HIV-  | 14 F<br>22 M<br>NR           | 1.5-5.0<br><br>1.5-5.0                           |
| 13 | 2000 | Jaquet       | France        | Descriptive Correlational          | To investigate body fat distribution and glucose and lipid metabolism in HIV infected children with                                                                                                           | HIV+         | 39 HIV+                 | 20 F<br>19 M                 | 9.1 (4.0)                                        |
| 14 | 2000 | Keyser       | United States | Descriptive Correlational          | To determine the degree to which cardiorespiratory insufficiency limited physical performance of adolescents who were seropositive for HIV                                                                    | HIV+         | 17 HIV+                 | 12 F<br>5 M                  | 18 (2.0)                                         |
| 15 | 2000 | Mismer       | United States | Analytic Observational             | To determine which nutritional, anthropometric, clinical, and social factors are predictive of a change in functional status                                                                                  | HIV+         | 35 HIV+                 | 14 F<br>21 M                 | 5.3 (2.5)                                        |
| 16 | 2001 | Arpadi       | United States | Analytic                           | To characterize the change in regional fat over time in a sample of                                                                                                                                           | HIV+         | 28 HIV+                 | 18 F                         | 7.5 (2.3)                                        |

|    |      |            |                              |                                |                                                                                                                                                                    |              |                      |                                |                                                        |  |
|----|------|------------|------------------------------|--------------------------------|--------------------------------------------------------------------------------------------------------------------------------------------------------------------|--------------|----------------------|--------------------------------|--------------------------------------------------------|--|
|    |      |            |                              | Observational                  | HIV-infected children                                                                                                                                              |              |                      | 10 M                           |                                                        |  |
| 17 | 2001 | Brambilla  | Italy                        | Analytic<br>Case-control       | To verify changes in fat distribution and of increased metabolic risk in HIV-infected children                                                                     | HIV+<br>HIV- | 34 HIV+<br>34 HIV-   | 18 F<br>16 M<br>18 F<br>16 M   | 11.9 (3.0)<br>11.9 (2.9)                               |  |
| 18 | 2001 | Dreimane   | United States                | Descriptive<br>Pilot study     | To study the effects of protease inhibitors on the height and weight of HIV-1-infected children                                                                    | HIV+         | 27 HIV+              | 11 F<br>16 M                   | 6.54 (3.3)                                             |  |
| 19 | 2001 | Ellis      | United States                | Descriptive<br>Method Validity | To develop an anthropometry-based prediction model for the assessment of bone mineral content in children                                                          | HIV+<br>HIV- | 14 HIV+<br>982 HIV-  | 6 F<br>8 M<br>537 F<br>445 M   | 7.7 (2.2)<br>10.3 (1.9)<br>11.63 (3.8)<br>11.17 (3.73) |  |
| 20 | 2001 | Melvin     | United States                | Descriptive<br>Correlational   | To determine blood lipid levels, insulin sensitivity, and body composition in HIV-1-infected children                                                              | HIV+         | 35 HIV+              | 23 F<br>12 M                   | 9.0 (4–18)                                             |  |
| 21 | 2001 | Miller     | United States                | Analytic<br>Observational      | To determine the effect of protease inhibitors on growth and body composition in children with human immunodeficiency virus type 1 infection                       | HIV+         | 67 HIV+              | 34 F<br>33 M                   | 6.8 (3.7)                                              |  |
| 22 | 2001 | Mora       | Italy                        | Analytic<br>Case-control       | To evaluate the occurrence and define the aetiology of osteopenia in children receiving highly active antiretroviral therapy                                       | HIV+<br>HIV- | 40 HIV+<br>314 HIV-  | 22 F<br>18 M<br>140 F<br>174 M | 11.5 (1.97)<br>(4.9 to 18.5)                           |  |
| 23 | 2001 | O'Brien    | United States                | Descriptive<br>Correlational   | To examine the effect of HIV infection on calcium status and bone growth in children                                                                               | HIV+         | 19 HIV+              | 19 F                           | 9.2 (2.6)                                              |  |
| 24 | 2001 | Tan        | United States                | Analytic<br>Case-control       | To measured serum osteocalcin levels in prepubertal children with human immunodeficiency virus                                                                     | HIV+<br>HIV- | 42 HIV+<br>36 HIV-   | 29 F<br>13 M<br>15 F<br>11 M   | 7.0 (2.8)<br>6.8 (2.6)                                 |  |
| 25 | 2002 | Amaya      | United States                | Descriptive<br>Correlational   | To determine the prevalence of fat redistribution, hyperlipidemia and insulin resistance in HIV-infected children                                                  | HIV+         | 40 HIV+              | 22 F<br>18 M                   | 9.1 (2.9)                                              |  |
| 26 | 2002 | Arpadi     | United States                | Analytic<br>Case-control       | To evaluate the effect of HIV infection on bone mineral content in children                                                                                        | HIV+<br>HIV- | 51 HIV+<br>262 HIV-  | 25 F<br>26 M<br>129 F<br>135 M | 8.2 (2.6)<br>8.4 (1.6)                                 |  |
| 27 | 2002 | Cade       | United States                | Analytic<br>Case-control       | To determine if aerobic capacity was diminished in late adolescents infected with HIV compared to controls                                                         | HIV+<br>HIV- | 15 HIV+<br>15 HIV-   | 11 F<br>4 M<br>11 F<br>4 M     | 18.3 (0.03)<br>18.3 (0.03)                             |  |
| 28 | 2002 | Cossarizza | Italy                        | Analytic<br>Case-control       | To verify the association between mitochondrial toxicity and the lipodystrophy syndrome in pediatric patients                                                      | HIV+<br>HIV- | 18 HIV+<br>6 HIV-    | 10 F<br>8 M<br>4 F<br>2 M      | (4 to 16)<br>11.7 (6.4)                                |  |
| 29 | 2002 | Horlick    | United States                | Descriptive<br>Method Validity | To evaluate the performance of 13 published pediatric BIA-based predictive equations for total body water and fat-free mass and to refit the best performing model | HIV+<br>HIV- | 54 HIV+<br>1247 HIV- | 30 F<br>24 M<br>597 F<br>640 M | (4 to 15)<br>(4 to 18)                                 |  |
| 30 | 2002 | Nachman    | United States<br>Puerto Rico | Analytic<br>Clinical trial     | To determine if age- and sex-adjustment growth z-scores correlative with HIV-1 RNA level                                                                           | HIV+         | 197 HIV+             | 106 F<br>91 M                  | 7.2 (NR)                                               |  |
| 31 | 2002 | Rondanelli | Italy                        | Analytic                       | To better characterize the somatotrophic axis by measuring                                                                                                         | HIV+         | 15 HIV+              | 7 F                            | 9.1 (1.4)                                              |  |

|    |      |             |               |                                          |                                                                                                                                                                                     |              |                         |                                |                                 |
|----|------|-------------|---------------|------------------------------------------|-------------------------------------------------------------------------------------------------------------------------------------------------------------------------------------|--------------|-------------------------|--------------------------------|---------------------------------|
|    |      |             |               | Case-control                             | spontaneous 24-hr secretion of GH and spontaneous and stimulated IGF-I and IGF-binding protein 3 (IGFBP-3) secretion in children with HIV infection                                 | HIV-         | 16 HIV-                 | 8 M<br>6 F<br>10 M             | 8.6 (1.3)                       |
| 32 | 2002 | Verweel     | Netherlands   | Descriptive<br>Correlational             | To evaluate the effect of highly active antiretroviral therapy on growth in children with HIV-1 infection                                                                           | HIV+         | 24 HIV+                 | 13 F<br>11 M                   | 5.2 (0.4-16.3)*                 |
| 33 | 2003 | Beregszaszi | France        | Analytic<br>Case-control                 | To assess in situ the insulin sensitivity of the lipohypertrophic subcutaneous abdominal adipose tissue using the microdialysis technique in HIV-infected children                  | HIV+<br>HIV- | 14 HIV+<br><br>6 HIV-   | 5 F<br>9 M<br>2 F<br>4 M       | 12.6 (4.2)<br><br>10.7 (1.5)    |
| 34 | 2003 | Bitnun      | Canada        | Descriptive<br>Correlational             | To determine the extent and degree of abnormalities of serum lipids, glucose homeostasis and abdominal adipose tissue distribution in PI-treated and PI-naive HIV-infected children | HIV+         | 50 HIV+                 | 23F<br>27 M                    | 8.6 (4.4)                       |
| 35 | 2003 | Bockhorst   | United States | Descriptive<br>Correlational             | To examine the relationships between lipodystrophy, PI use, lipid abnormalities and markers of insulin sensitivity children in the pediatric HIV                                    | HIV+         | 26 HIV+                 | NR                             | 9.7 (4.6-14.9)*                 |
| 36 | 2003 | McComsey    | United States | Analytic<br>Open label<br>Clinical trial | To evaluate the virologic and immunologic effect of PI substitution with efavirenz in HIV-infected children                                                                         | HIV+         | 17 HIV+                 | 10 F<br>7 M                    | 10.0 (NR)                       |
| 37 | 2003 | Vigano      | Italy         | Descriptive<br>Correlational             | To characterize the growth hormone profile and the insulin-like growth factor system in treated HIV adolescents with and without excess visceral fat accumulation                   | HIV+         | 25 HIV+                 | 14 F<br>11 M                   | 13.8 (3.1)                      |
| 38 | 2003 | Vigano      | Italy         | Analytic<br>Case-control                 | To assess body composition changes in HIV-infected children receiving highly active antiretroviral therapy                                                                          | HIV+<br>HIV- | 37 HIV+<br><br>54 HIV-  | 20 F<br>17 M<br>30 F<br>24 M   | 12.2 (2.9)<br><br>11.8 (2.8)    |
| 39 | 2003 | Zamboni     | Italy         | Descriptive<br>Correlational             | To identify possible bone alterations in HIV-infected children                                                                                                                      | HIV+         | 13 HIV+                 | 9 F<br>4 M                     | 7.8 (2.9)                       |
| 40 | 2004 | Ghaffari    | United States | Analytic<br>Clinical Trial               | To evaluate 96-week clinical and immune outcomes to protease inhibitor- containing antiretroviral therapy                                                                           | HIV+         | 40 HIV+                 | 16 F<br>24 M                   | 7.1 (NR)                        |
| 41 | 2004 | Hardin      | United States | Analytic<br>Case-control                 | To measure protein turnover in HIV-infected children and to compare these values to those obtained from age and weight-matched healthy children                                     | HIV+<br>HIV- | 8 HIV+<br><br>8 HIV-    | 5 F<br>3 M<br>5 F<br>3 M       | 4.9 (1.7)<br><br>4.7 (1.4)      |
| 42 | 2004 | Mora        | Italy         | Analytic<br>Case-control                 | To monitor the changes of BMD and bone metabolism over a period of 12 months                                                                                                        | HIV+<br>HIV- | 32 HIV+<br><br>381 HIV- | 15 F<br>17 M<br>172 F<br>209 M | 12.4 (0.5)<br><br>(5.7 to 19.2) |
| 43 | 2004 | Panamonta   | Thailand      | Descriptive<br>Correlational             | To assess the endocrine function of Thai children infected with HIV                                                                                                                 | HIV+         | 36 HIV+                 | 24 F<br>12 M                   | 7.0 (2.0)                       |
| 44 | 2004 | Rojo        | Spain         | Descriptive<br>Correlational             | To evaluate the prevalence of alterations in bone mineral density and possible associated factors in a cohort of HIV-infected children                                              | HIV+         | 50 HIV+                 | 25 F<br>25 M                   | 10.6 (5.3)                      |
| 45 | 2004 | Stagi       | Italy         | Analytic<br>Case-control                 | To evaluate the bone quality and assess the role of the insulin growth factor system in the bone metabolism and skeletal status of HIV-1 perinatally infected children              | HIV+<br>HIV- | 44 HIV+<br><br>55 HIV-  | 26 F<br>18 M<br>23 F<br>22 M   | 8.4 (2.1)<br><br>8.4 (2.1)      |
| 46 | 2004 | Taylor      | United States | Analytic<br>Clinical Trial               | To characterize the type and frequency of biochemical lipid abnormalities and physical changes in body composition associated                                                       | HIV+         | 94 HIV+                 | 41 F<br>53 M                   | (0.5 to 17.9)                   |



|    |      |                    |                                                                                                                     |                                            |                                                                                                                                                                         |              |                      |                                |                                       |
|----|------|--------------------|---------------------------------------------------------------------------------------------------------------------|--------------------------------------------|-------------------------------------------------------------------------------------------------------------------------------------------------------------------------|--------------|----------------------|--------------------------------|---------------------------------------|
|    |      |                    |                                                                                                                     |                                            | with the use of PI-containing antiretroviral therapy among HIV – infected children treated for up to 6 years                                                            |              |                      |                                |                                       |
| 47 | 2004 | Thorne             | Italy<br>Spain<br>Belgium<br>Germany<br>Sweden<br>United Kingdom<br>Netherlands<br>Denmark<br>Poland<br>Switzerland | Descriptive<br>Correlational               | To estimate prevalence of body fat redistribution and dyslipidemia in HIV-infected children                                                                             | HIV+         | 477 HIV+             | 250 F<br>22 M                  | 9.78 (3-18)*                          |
| 48 | 2005 | Aldámiz-Echevarría | Spain                                                                                                               | Analytic<br>Case-control                   | To study plasma fatty acid composition in HIV-infected children                                                                                                         | HIV+<br>HIV- | 17 HIV+<br>112 HIV-  | 9 F<br>8 M<br>NR               | 6.7 (4.1)<br>NR                       |
| 49 | 2005 | Bitnun             | Canada                                                                                                              | Descriptive<br>Correlational               | To define more precisely the impact of PI therapy on glucose homeostasis in HIV-infected children                                                                       | HIV+         | 48 HIV+              | 21 F<br>27 M                   | 9.1 (4.3)                             |
| 50 | 2005 | Giacomet           | Italy                                                                                                               | Analytic<br>Clinical Trial<br>Case-control | To assess whether the substitution of stavudine with tenofovir would result in decreased bone mineral content and bone mineral density accrual in HIV-infected children | HIV+<br>HIV- | 16 HIV+<br>166 HIV-  | NR                             | 13.3 (6.4-17.9)*<br>13.1 (5.7-19.9)*  |
| 51 | 2005 | Hardin             | United States                                                                                                       | Analytic<br>Clinical Trial                 | To explore the effect of growth hormone on protein catabolism in HIV-infected children                                                                                  | HIV+         | 6 HIV+               | 2 F<br>4 M                     | 9.2 (NR)                              |
| 52 | 2005 | Hazra              | United States                                                                                                       | Analytic<br>Open label<br>Clinical trial   | To provide preliminary pediatric safety and dosing information on tenofovir disoproxil fumarate                                                                         | HIV+         | 18 HIV+              | 7 F<br>11 M                    | 12.0 (2.5)                            |
| 53 | 2005 | Jacobson           | United States                                                                                                       | Analytic<br>Case-control                   | To compare bone mineral density among HIV-infected children with population norms                                                                                       | HIV+<br>HIV- | 37 HIV+<br>9 HIV-    | 19 F<br>18 M<br>3 F<br>9 M     | 16.6 (9.6-13.8)*<br>10.4 (7.8-11.4)*  |
| 54 | 2005 | Mora               | Italy                                                                                                               | Analytic<br>Case-control                   | To describe the bone mass measurements of a group of horizontally HIV-infected youth who were not receiving ART                                                         | HIV+<br>HIV- | 16 HIV+<br>119 HIV-  | 10 F<br>6 M<br>63 F<br>56 M    | 9.33 (3.96)<br>9.74 (3.33)            |
| 55 | 2005 | Pitukcheewanont    | United States                                                                                                       | Analytic<br>Case-control                   | To evaluate bone measurements in HIV-1 infected children and adolescents                                                                                                | HIV+<br>HIV- | 58 HIV+<br>58 HIV-   | 32 F<br>26 M<br>32 F<br>26 M   | 12.03 (3.88)<br>12.1 (3.86)           |
| 56 | 2005 | Rosso              | Italy                                                                                                               | Descriptive<br>Correlational               | To examine the effects of disease and therapy-associated factors on bone mass                                                                                           | HIV+<br>HIV- | 44 HIV+<br>1227 HIV- | 23 F<br>21 M<br>568 F<br>641 M | 10.8 (4.0)<br>10.0 (4.0)<br>(3 to 16) |
| 57 | 2005 | Vigano             | Italy                                                                                                               | Analytic<br>Open label<br>Clinical trial   | To assess the efficacy of recombinant human growth hormone treatment on lipodystrophy in HIV-infected adolescents                                                       | HIV+<br>HIV- | 8 HIV+<br>97 HIV-    | 5 F<br>3 M<br>46 F<br>51 M     | 15.7 (13.7-18.5)*<br>14.5 (3.0)       |

|    |      |                |                                                                                                           |                                          |                                                                                                                                                                                                |              |                      |                                |                                                      |
|----|------|----------------|-----------------------------------------------------------------------------------------------------------|------------------------------------------|------------------------------------------------------------------------------------------------------------------------------------------------------------------------------------------------|--------------|----------------------|--------------------------------|------------------------------------------------------|
| 58 | 2006 | Barros         | Brazil                                                                                                    | Descriptive<br>Correlational             | To describe physical fitness variables of children and adolescents HIV-infected                                                                                                                | HIV+         | 33 HIV+              | 11 F<br>22 M                   | 8.9 (1.9)<br>8.6 (1.6)                               |
| 59 | 2006 | Ergun-Longmire | United States                                                                                             | Descriptive<br>Correlational             | To evaluate the effects of PI as ART in comparison with other ART non-PI medications on glucose tolerance, lipid metabolism, and body fat distribution in HIV-infected young patients          | HIV+         | 21 HIV+              | 15 F<br>6 M                    | 11.9 (NR)                                            |
| 60 | 2006 | Gafni          | United States                                                                                             | Analytic<br>Open label<br>Clinical trial | To test the association of tenofovir disoproxil fumarate with normal skeletal growth                                                                                                           | HIV+         | 15 HIV+              | 5 F<br>10 M                    | 12.0 (2.0)                                           |
| 61 | 2006 | Gutiérrez      | Uruguay                                                                                                   | Descriptive<br>Correlational             | To describe the lipodystrophy prevalence in HIV-infected children                                                                                                                              | HIV+         | 60 HIV+              | NR                             | 6.8 (3.3)                                            |
| 62 | 2006 | Haroun         | United<br>Kingdom                                                                                         | Analytic<br>Case-control                 | To assess growth and obesity status in outpatients characterized by diseases traditionally associated with poor growth or under-nutrition                                                      | HIV+<br>HIV- | 49 HIV+<br>57 HIV-   | 24 F<br>25 M<br>25 F<br>32 M   | 10.0 (4.3)<br>10.8 (4.0)                             |
| 63 | 2006 | Hartman        | Netherlands                                                                                               | Descriptive<br>Correlational             | To obtain an objective case definition of the lipodystrophy syndrome                                                                                                                           | HIV+         | 32 HIV+              | 14 F<br>18 M                   | (0.7 to 17.1)                                        |
| 64 | 2006 | Moscocki       | United States                                                                                             | Analytic<br>Case-control                 | To investigate whether factors influencing body composition may be unique for male and female adolescents with horizontal transmission of HIV                                                  | HIV+<br>HIV- | 326 HIV+<br>193 HIV- | 236 F<br>90 M<br>146 F<br>47 M | 16.8 (1.1)<br>17.2 (0.9)<br>16.5 (1.3)<br>16.8 (1.2) |
| 65 | 2006 | Verkauskiene   | France                                                                                                    | Descriptive<br>Correlational             | To investigate fat redistribution and metabolic abnormalities in HIV-infected children                                                                                                         | HIV+         | 130 HIV+             | 66 F<br>64 M                   | 10.0 (2.0-18.0)*                                     |
| 66 | 2006 | Weidle         | Romania<br>Uganda<br>Botswana<br>Cote d'Ivoire<br>Kenya<br>Mozambique<br>Rwanda<br>South Africa<br>Zambia | Analytic<br>Clinical Trial               | To compares the precision of weight-based doses for zidovudine and didanosine as compared with body surface area-based doses using height, weight and age information in HIV-infected children | HIV+         | 826 HV+              | 395 F<br>429 M                 | 9.6 (NR)                                             |
| 67 | 2007 | Chantry        | United States<br>Puerto Rico                                                                              | Analytic<br>Case-control                 | To investigated endocrine differences between perinatally HIV-infected and HIV-exposed, uninfected control children                                                                            | HIV+<br>HIV- | 21 HIV+<br>46 HIV-   | 9 F<br>12 M<br>26 F<br>20 M    | 4.58 (NR)<br>4.53(NR)                                |
| 68 | 2007 | Dzwonek        | United<br>Kingdom                                                                                         | Descriptive<br>Correlational             | To determine whether there is an association of leptin with lipodystrophy in HIV-infected children                                                                                             | HIV+         | 104 HIV+             | 53 F<br>51 M                   | 9.5 (3.6)                                            |
| 69 | 2007 | Ene            | Belgium                                                                                                   | Descriptive<br>Correlational             | To assess the prevalence of the lipodystrophy syndrome in our cohort of HIV-1 infected children                                                                                                | HIV+         | 88 HIV+              | 52 F<br>36 M                   | 11.1 (NR)                                            |
| 70 | 2007 | Kim            | United States                                                                                             | Descriptive<br>Correlational             | To compare growth, lipids and adipocytokines in HIV-positive children with and without lipoatrophy                                                                                             | HIV+         | 33 HIV+              | 15 F<br>18 M                   | 11.8 (6.5-18.6)*<br>12.1 (6.6-20.6)*                 |
| 71 | 2007 | McComsey       | United States                                                                                             | Analytic<br>Case-control                 | To assess carotid intima media thickness and cardiac biomarkers in HIV infected children                                                                                                       | HIV+<br>HIV- | 31 HIV+<br>31 HIV-   | 20 F<br>11 M<br>21 F<br>10 M   | 9.0 (2-20)<br>9.0 (2-21)                             |
| 72 | 2007 | Mora           | Italy                                                                                                     | Analytic<br>Case-control                 | To quantify the serum concentrations of osteoprotegerin and nuclear factor kappa B ligand in a cohort of HIV-infected children                                                                 | HIV+<br>HIV- | 27 HIV+              | 14 F<br>13 M                   | 12.6 (0.7)                                           |

|    |      |               |                              |                                          |                                                                                                                                                                                                             |              |                          |                                  |                                    |
|----|------|---------------|------------------------------|------------------------------------------|-------------------------------------------------------------------------------------------------------------------------------------------------------------------------------------------------------------|--------------|--------------------------|----------------------------------|------------------------------------|
|    |      |               |                              |                                          |                                                                                                                                                                                                             |              | 336 HIV-                 | 162 F<br>173 M                   | (4.8 to 17.9)                      |
| 73 | 2007 | Papaevangelou | Greece                       | Analytic<br>Case-control                 | To study leptin levels in serial serum samples of HIV-infected children before and after ART                                                                                                                | HIV+<br>HIV- | 8 HIV+<br><br>3 HIV-     | 6 F<br>2 M<br>3 F                | 3.5 (NR)<br><br>7.0 (NR)           |
| 74 | 2007 | Tremechin     | Brazil                       | Analytic<br>Case-control                 | To compare the nutritional status and the 24-hour urine excretion of N <sup>15</sup> -methylnicotinamide among HIV-positive and HIV-negative children                                                       | HIV+<br>HIV- | 20 HIV+<br><br>20 HIV-   | 8 F<br>12 M<br>8 F<br>12 M       | 7.85 (1.7)<br><br>8.35 (1.5)       |
| 75 | 2007 | Vigano        | Italy                        | Analytic<br>Open label<br>Clinical trial | To assess the effect on body composition parameters of replacing stavudine with tenofovir and PI efavirenz in pediatric patients                                                                            | HIV+<br>HIV- | 24 HIV+<br><br>143 HIV-  | 12 F<br>12 M<br>NR               | 12.4 (3.9)<br><br>(4.9 to 20.0)    |
| 76 | 2007 | Vigano        | Italy                        | Analytic<br>Open label<br>Clinical trial | To assess renal safety and glomerular filtration rate changes as estimated by the Schwartz and Cockcroft-Gault equations in HIV infected children treated with tenofovir for 96 weeks                       | HIV+<br>HIV- | 27 HIV+<br><br>143 HIV-  | 14 F<br>13 M<br>67 F<br>76 M     | 12.4 (3.9)<br><br>12.3 (4.4)       |
| 77 | 2008 | Chantry       | United States                | Analytic<br>Case-control                 | To describe insulin-like growth factor-1 and insulin-like growth factor-1-binding protein-1 and insulin-like growth factor-3-binding protein-3 in HIV+ children before and after initiating or changing ART | HIV+<br>HIV- | 97 HIV+<br><br>NR        | 52 F<br>45 M<br>NR               | 5.9 (3.6)<br><br>NR                |
| 78 | 2008 | Gonzales-Tome | Spain                        | Analytic<br>Experimental                 | To describe the effects in metabolic abnormalities in seven HIV-infected children, previously treated with PI after switching to nevirapine                                                                 | HIV+         | 7 HIV+                   | 2 F<br>5 M                       | 11.1 (8.3)                         |
| 79 | 2008 | Miller        | United States                | Analytic<br>Case-control                 | To determine risk factors for cardiovascular disease in children infected with HIV                                                                                                                          | HIV+<br>HIV- | 42 HIV+<br><br>4437 HIV- | 27 F<br>15 M<br>2219 F<br>2218 M | 10.1 (NR)<br><br>8.8 (NR)          |
| 80 | 2008 | Purdy         | United States                | Analytic<br>Open label<br>Clinical trial | To characterize the change in BMD during and after treatment with tenofovir disoproxil fumarate in a separate cohort of children and adolescents infected with HIV                                          | HIV+         | 6 HIV+                   | 2 F<br>4 M                       | 12.8 (NR)                          |
| 81 | 2008 | Sharma        | United States                | Analytic<br>Observational                | To analyzed dietary macronutrient intake in HIV-infected children                                                                                                                                           | HIV+         | 116 HIV+                 | 67 F<br>49 M                     | 6.6 (3.1-18.5)*<br>8.5 (3.1-19.0)* |
| 82 | 2008 | Spagnoulo     | Italy                        | Analytic<br>Case-control                 | To determine whether or not serum levels of resistin are marker of fat redistribution in HIV-infected children                                                                                              | HIV+<br>HIV- | 18 HIV+<br>14 HIV-       | NR                               | 10.3 (3.2)<br>10.7 (3.4)           |
| 83 | 2009 | Aldrovandi    | United States<br>Puerto Rico | Analytic<br>Case-control                 | To compare the distribution of lipid and glucose abnormalities and altered fat distribution among vertically HIV-infected subjects and controls                                                             | HIV+<br>HIV- | 240 HIV+<br><br>146 HIV- | 113 F<br>127 M<br>62 F<br>84 M   | 12.6 (NR)<br><br>11.9 (NR)         |
| 84 | 2009 | Arpadi        | United states                | Analytic<br>Case-control                 | To compare changes in regional fat distribution in HIV-infected and healthy children and adolescents                                                                                                        | HIV+<br>HIV- | 64 HIV+<br><br>147 HIV-  | 33 F<br>31 M<br>74 F<br>73 M     | 10.3 (3.7)<br><br>11.6 (2.8)       |
| 85 | 2009 | Lopez         | Colombia                     | Analytic<br>Case-control                 | To describe metabolic alterations in HIV-infected children                                                                                                                                                  | HIV+<br>HIV- | 35 HIV+<br>35 HIV-       | NR                               | 8.37 (NR)<br>8.31 (NR)             |
| 86 | 2009 | Mora          | Italy                        | Descriptive<br>Method Validity           | To assess applicability of quantitative ultrasonography for bone health assessment in HIV-infected youths                                                                                                   | HIV+         | 88 HIV+                  | 45 F<br>43 M                     | (4.8 to 22.1)                      |
| 87 | 2009 | Sarni         | Brazil                       | Descriptive<br>Correlational             | To evaluate the presence of clinical lipodystrophy in HIV-infected children                                                                                                                                 | HIV+         | 30 HIV+                  | 16 F<br>14 M                     | 9.1 (2.5)                          |

|     |      |          |                              |                               |                                                                                                                                                                                                |              |                          |                                |                                                      |
|-----|------|----------|------------------------------|-------------------------------|------------------------------------------------------------------------------------------------------------------------------------------------------------------------------------------------|--------------|--------------------------|--------------------------------|------------------------------------------------------|
| 88  | 2009 | Vigano   | Italy                        | Analytic<br>Observational     | To describe a 4-year course of glucose homeostasis in a cohort of HIV-infected children and adolescents                                                                                        | HIV+         | 37 HIV+                  | 20 F<br>17 M                   | 12 (7-12)*                                           |
| 89  | 2010 | Cervia   | United States                | Analytic<br>Observational     | To address the dearth of knowledge regarding associations of pro-inflammatory cytokines with measures of disease progression, growth, body composition and metabolism in HIV-infected children | HIV+         | 49 HIV+                  | 28 F<br>21 M                   | 7.0 (3.7)                                            |
| 90  | 2010 | Chantry  | United States                | Analytic<br>Observational     | To describe growth and body composition changes in HIV-positive children                                                                                                                       | HIV+         | 97 HIV+                  | 52 F<br>45 M                   | 5.9 (3.6)                                            |
| 91  | 2010 | Jacobson | United States                | Analytic<br>Case-control      | To characterize total body BMC and total body and spinal BMD in perinatally HIV-infected and uninfected children                                                                               | HIV+<br>HIV- | 236 HIV+<br><br>143 HIV- | 112 F<br>124 M<br>60 F<br>83 M | 12.6 (NR)<br><br>11.9 (NR)                           |
| 92  | 2010 | Miller   | United States                | Analytic<br>Case-control      | To compared biomarkers of vascular dysfunction among HIV-infected children to a demographically similar group of uninfected children                                                           | HIV+<br>HIV- | 106 HIV+<br><br>55 HIV-  | 59 F<br>47 M<br>24 F<br>26 M   | 14.8 (4.3)<br><br>12.3 (3.8)                         |
| 93  | 2010 | Miller   | United States                | Analytic<br>Experimental      | To determine if a structured training program in HIV-infected children is feasible and safe, improves fitness and strength, and changes body composition                                       | HIV+         | 17 HIV+                  | 8 F<br>9 M                     | 15.0 (6.0-22.6)*                                     |
| 94  | 2010 | Stagi    | Italy                        | Analytic<br>Observational     | To present the auxological data up to final height in a cohort of patients with perinatal HIV infection                                                                                        | HIV+         | 95 HIV+                  | 57 F<br>38 M                   | 17.5 (13.7-23.2)*                                    |
| 95  | 2010 | Vigano   | Italy                        | Analytic<br>Experimental      | To assess the safety of a tenofovir disoproxil fumarate-containing ART on BMD in pediatric patients                                                                                            | HIV+         | 21 HIV+                  | 11 F<br>10 M                   | 12.1 (4.9-17.9)*                                     |
| 96  | 2010 | Werner   | Brazil                       | Descriptive<br>Correlational  | To describe lipid profile, body shape changes, and cardiovascular risk factors in HIV- infected children and adolescents                                                                       | HIV+         | 43 HIV+                  | 21 F<br>22 M                   | 9.6 (1.9)                                            |
| 97  | 2010 | Zuccotti | Italy                        | Analytic<br>Case-control      | To assess the role of different antiretroviral treatments on skeletal health in a cohort of HIV-infected children and adolescents                                                              | HIV+<br>HIV- | 86 HIV+<br><br>194 HIV-  | 47 F<br>36 M<br>90 F<br>104 M  | 14.3 (0.8)<br>15.1 (0.8)<br>13.0 (0.5)<br>13.0 (0.4) |
| 98  | 2011 | Contri   | Brazil                       | Analytic<br>Observational     | To describe nutritional status, body composition and lipid profile in children and adolescents receiving protease inhibitors                                                                   | HIV+         | 59 HIV+                  | 30 F<br>29 M                   | 9.5 (4.5-16.3)*<br>9.54 (5.0-15.8)*                  |
| 99  | 2011 | da Silva | Brazil                       | Descriptive<br>Correlational  | To verify the presence of body and metabolic alterations as well as body satisfaction in children and teenagers undergoing ART                                                                 | HIV+         | 38 HIV+                  | 22 F<br>16 M                   | 9.9 (3.0)                                            |
| 100 | 2011 | Dimock   | United States                | Analytic<br>Observational     | To characterize metabolic disturbances both cross-sectionally and over time in a group of HIV-infected adolescents and young adults                                                            | HIV+         | 39 HIV+                  | 19 F<br>20 M                   | 17.5 (3.7)                                           |
| 101 | 2011 | Geffner  | United States<br>Puerto Rico | Descriptive]<br>Correlational | To determine the prevalence of insulin resistance in HIV-infect children and adolescents                                                                                                       | HIV+         | 402 HIV+                 | 214 F<br>188 M                 | 12.4 (2.3)                                           |
| 102 | 2011 | Jacobson | United States                | Analytic<br>Case-control      | To compare total body fat and its distribution in perinatally HIV-infected and HIV-exposed uninfected                                                                                          | HIV+<br>HIV- | 369 HIV+<br><br>89 HIV-  | 196 F<br>173 M<br>87 F<br>89 M | 12.2 (2.6)<br><br>10.9 (2.3)                         |
| 103 | 2011 | Mohd     | Malaysia                     | Descriptive<br>Correlational  | To determine the nutritional status of children living with HIV currently receiving ART                                                                                                        | HIV+         | 95 HIV+                  | 41 F<br>54 M                   | 8.4 (3.9)                                            |
| 104 | 2011 | Morén    | Spain                        | Analytic<br>Case-control      | To determine the mitochondrial status of a group of HIV- infected children                                                                                                                     | HIV+<br>HIV- | 69 HIV+<br><br>24 HIV-   | 35 F<br>34 M<br>8 F<br>16 M    | 12.4 (1.2)<br><br>10.9 (1.2)                         |
| 105 | 2011 | Ramalho  | Brazil                       | Analytic                      | To compare growth, nutritional status and body composition outcomes                                                                                                                            | HIV+         | 94 HIV+                  | 39 F                           | 12.72 (7.7-19.8)*                                    |

|     |      |               |                                   |                              |                                                                                                                                                                                                                          |              |                          |                               |                                           |
|-----|------|---------------|-----------------------------------|------------------------------|--------------------------------------------------------------------------------------------------------------------------------------------------------------------------------------------------------------------------|--------------|--------------------------|-------------------------------|-------------------------------------------|
|     |      |               |                                   | Case-control                 | between HIV-infected children and adolescents on ART and healthy controls                                                                                                                                                | HIV-         | 364 HIV-                 | 55 M<br>186 F<br>178 M        | 12.1 (8.1-18.3)*                          |
| 106 | 2011 | Resino        | Spain                             | Analytic<br>Observational    | To evaluate the evolution of plasma adipokines and lipodystrophy in protease inhibitor-naïve vertically HIV-infected children                                                                                            | HIV+         | 27 HIV+                  | 19 F<br>8 M                   | 9.4 (4.5-12.6)*                           |
| 107 | 2011 | Spoulou       | Greece                            | Analytic<br>Case-control     | To evaluate body composition by DXA in a cohort of Greek HIV-1 infected children and adolescents on ART                                                                                                                  | HIV+<br>HIV- | 17 HIV+<br><br>159 HIV-  | 10 F<br>7 M<br>79 F<br>84 M   | 12.5 (4.0)<br><br>12.7 (4.9)              |
| 108 | 2011 | Tremeschin    | Brazil                            | Analytic<br>Case-control     | To report longitudinal clinical data for pediatric patients continuously exposed to ART regimens and healthy controls groups                                                                                             | HIV+<br>HIV- | 17 HIV+<br>16 HIV-       | NR                            | 10.5 (5.0-16.2)*                          |
| 109 | 2011 | Vigano        | Italy                             | Analytic<br>Case-control     | To investigated serum adiponectin concentration in a cohort of HIV-infected youths                                                                                                                                       | HIV+<br>HIV- | 36 HIV+<br><br>171 HIV-  | 20 F<br>16 M<br>91 F<br>80 M  | 13.3 (3.8)<br><br>(4.9 to 17.9)           |
| 110 | 2012 | Alam          | Belgium<br>Italy<br>Poland        | Descriptive<br>Correlational | To estimate the prevalence of, and identify risk factors for Lipodystrophy Syndrome and body fat abnormality in a population of HIV-infected children and adolescents                                                    | HIV+         | 426 HIV+                 | 214 F<br>201 M                | 12.2 (NR)                                 |
| 111 | 2012 | Arpadi        | United States                     | Analytic<br>Clinical trial   | To evaluate the effect of vitamin D and calcium supplementation on bone mass accrual in HIV-infected youth                                                                                                               | HIV+         | 59 HIV+                  | 33 F<br>26 M                  | 10.2 (NR)                                 |
| 112 | 2012 | Bhargav       | India                             | Descriptive<br>Correlational | To determine the incidence of maternal to child transmission of HIV infection in the Belgaum district of Karnataka State, India                                                                                          | HIV+         | 44 HIV+                  | 14 F<br>30 M                  | 10.8 (3.1)                                |
| 113 | 2012 | Innes         | South Africa                      | Descriptive<br>Correlational | To explore the prevalence and risk factors for lipoatrophy in a group of pre-pubertal South African children on ART                                                                                                      | HIV+         | 100 HIV+                 | 48 F<br>52 M                  | 7.4 (5.9-9.3)*<br>5.9 (4.2-7.7)*          |
| 114 | 2012 | Lindsey       | United States<br>Puerto Rico      | Analytic<br>Case-control     | To investigate relationships between body composition, lipid levels and glucose metabolism in HIV-infected and HIV-uninfected children and young adults using data from a cross-sectional study                          | HIV+<br>HIV- | 236 HIV+<br>143 HIV-     | 171 F<br>208 M                | 12.4 (7-24)*                              |
| 115 | 2012 | Miller        | United States                     | Analytic<br>Case-control     | To compare levels of biomarkers of vascular dysfunction in HIV-infected children (with and without hyperlipidemia) with those in HIV-exposed, uninfected children enrolled in the Pediatric HIV/AIDS Cohort Study        | HIV+<br>HIV- | 226 HIV+<br><br>140 HIV- | 127 F<br>99 M<br>65 F<br>75 M | 12.3 (10.4-14.0)*<br><br>10.1 (8.2-12.3)* |
| 116 | 2012 | Negra         | United States<br>Brazil<br>Panama | Analytic<br>Clinical trial   | To present the 48-week data on the efficacy and safety of tenofovir disoproxil fumarate in combination with an optimized background regimen in treatment-experienced HIV-1 infected adolescents with viremia despite ART | HIV+         | 87 HIV+                  | NR                            | (12 to 18)                                |
| 117 | 2012 | Puthanakit    | Thailand                          | Analytic<br>Case-control     | To assess the prevalence and predictors of low BMD among HIV-infected Thai adolescents receiving ART                                                                                                                     | HIV+<br>HIV- | 101 HIV+<br><br>199 HIV- | 49 F<br>51 M<br>NR            | 14.3 (1.3-15.7)*<br><br>NR                |
| 118 | 2012 | Ramos         | Puerto Rico                       | Analytic<br>Case-control     | To determine the anaerobic power and muscle strength of preadolescents with human immunodeficiency virus                                                                                                                 | HIV+<br>HIV- | 15 HIV+<br><br>15 HIV-   | 8 F<br>7 M<br>8 F<br>7 M      | 11 (7-14)*<br><br>11 (7-14)*              |
| 119 | 2012 | Schtscherbyna | Brazil                            | Descriptive<br>Correlational | To assess the prevalence and factors associated with low BMD in HIV-infected adolescents                                                                                                                                 | HIV+         | 74 HIV+                  | 41 F<br>33 M                  | 17.3 (1.8)                                |
| 120 | 2013 | Arpadi        | South Africa                      | Descriptive<br>Correlational | To examine the lipid profiles, insulin sensitivity, markers of inflammation, and regional fat distribution of HIV-infected children in                                                                                   | HIV+         | 156 HIV+                 | 75 F<br>81 M                  | 5.1 (0.8)                                 |

|     |      |                 |                              |                                |                                                                                                                                                                                                                                                                      |              |                          |                                |                                           |  |
|-----|------|-----------------|------------------------------|--------------------------------|----------------------------------------------------------------------------------------------------------------------------------------------------------------------------------------------------------------------------------------------------------------------|--------------|--------------------------|--------------------------------|-------------------------------------------|--|
|     |      |                 |                              |                                | South Africa who were initiated on a protease inhibitors-based regimen prior to age 2 years                                                                                                                                                                          |              |                          |                                |                                           |  |
| 121 | 2013 | Bunders         | Netherlands                  | Analytic<br>Observational      | To present longitudinal data on BMD obtained by DXA in combination antiretroviral therapy treated HIV-infected participants of the Pediatric Amsterdam HIV Cohort                                                                                                    | HIV+         | 66 HIV+                  | 36 F<br>30 M                   | 6.7 (4.5-10.3)*                           |  |
| 122 | 2013 | Chokephaibulkit | Thailand                     | Descriptive<br>Correlational   | To assess the prevalence of vitamin D deficiency among 101 perinatally HIV-infected Thai adolescents receiving ART                                                                                                                                                   | HIV+         | 101 HIV+                 | 50 F<br>51 M                   | 14.3 (13.0-15.7)*                         |  |
| 123 | 2013 | DiMeglio        | United States<br>Puerto Rico | Analytic<br>Case-control       | To estimate prevalence of low bone mineral density in perinatally HIV-infected and HIV-exposed but uninfected children, and to determine predictors of BMD                                                                                                           | HIV+<br>HIV- | 350 HIV+<br><br>160 HIV- | 189 F<br>161 M<br>84 F<br>76 M | 12.6 (10.2-14.4)*<br><br>10.7 (8.9-12.6)* |  |
| 124 | 2013 | dos Santos      | Brazil                       | Descriptive<br>Correlational   | To identify the immunological and virological characteristics and flexibility and abdominal resistance strength variables of HIV-infected children and adolescents using ART                                                                                         | HIV+         | 63 HIV+                  | 37 F<br>26 M                   | (7 to 17)                                 |  |
| 125 | 2013 | Fabiano         | Italy                        | Analytic<br>Experimental       | To describe the long-term (8-year) changes in growth, fat content and distribution, bone mass and metabolic parameters occurring in a series of 24 HIV-infected children who were switched from lamivudine + stavudine to tenofovir and from PI to efavirenz         | HIV+         | 24 HIV+                  | NR                             | 12 (NR)                                   |  |
| 126 | 2013 | Innes           | South Africa                 | Descriptive<br>Method Validity | To develop an anthropometric screening tool to detect lipoatrophy in prepubertal HIV- infected children                                                                                                                                                              | HIV+         | 100 HIV+                 | 48 F<br>52 M                   | 7.4 (5.9-9.3)*                            |  |
| 127 | 2013 | Lima            | Brazil                       | Descriptive<br>Correlational   | To describe BMD and BMC in children and adolescents infected with the human immunodeficiency virus                                                                                                                                                                   | HIV+         | 48 HIV+                  | 24 F<br>24 M                   | 12.5 (3.1)<br>12.9 (2.4)                  |  |
| 128 | 2013 | Macdonald       | Canada                       | Analytic<br>Observational      | To determine if bone health is compromised in perinatally HIV-infected youth                                                                                                                                                                                         | HIV+         | 31 HIV+                  | 12 F<br>19 M                   | 13.6 (11.6-16.0)*                         |  |
| 129 | 2013 | Palchetti       | Brazil                       | Descriptive<br>Correlational   | To identify lipodystrophy in prepubertal HIV-infected children using anthropometric parameters and body composition assessment                                                                                                                                       | HIV+         | 40 HIV+                  | 20 F<br>20 M                   | 9.8 (1.2)                                 |  |
| 130 | 2013 | Palchetti       | Brazil                       | Descriptive<br>Method Validity | To compare bioelectrical impedance analysis equations developed for healthy pediatric populations and for HIV-infected children using dual-energy X-ray absorptiometry as the gold standard                                                                          | HIV+         | 40 HIV+                  | 20 F<br>20 M                   | 9.8 (1.2)                                 |  |
| 131 | 2013 | Sharma          | United States                | Descriptive<br>Correlational   | To evaluate differences in mitochondrial DNA copy number and mitochondrial oxidative phosphorylation NADH dehydrogenase [Complex 1 (C1)] and cytochrome c oxidase [Complex 4 (C4)] enzyme activities among HIV-infected children with and without insulin resistance | HIV+         | 42 HIV+                  | 22 F<br>20 M                   | 13.45 (8.5-16.0)*<br>13.54 (8.7-16.2)*    |  |
| 132 | 2013 | Somarriba       | United States                | Analytic<br>Case-control       | To compare VO2 peak, maximal strength and endurance, and flexibility of HIV-infected and uninfected children to determine if clinical and HIV-specific factors are associated with physical fitness                                                                  | HIV+<br>HIV- | 45 HIV+<br><br>36 HIV-   | 21 F<br>24 M<br>14 F<br>22 M   | 16.1 (2.7)<br><br>13.5 (3.0)              |  |
| 133 | 2014 | Agustinho       | Argentina                    | Analytic<br>Case-control       | To investigate the prevalence of risk factors for early cardiovascular disease in HIV-infected children and adolescents                                                                                                                                              | HIV+<br>HIV- | 77 HIV+<br><br>60 HIV-   | 27 F<br>50 M<br>25 F<br>35 M   | 12.2 (3.0-18.3)*<br><br>9.9 (4.8-16.9)*   |  |
| 134 | 2014 | Dejckhamron     | Thailand                     | Analytic<br>Observational      | To determine the prevalence of insulin resistance, dyslipidemia, and their inter-relationships in HIV-infected Thai children                                                                                                                                         | HIV+         | 28 HIV+                  | 10 F<br>18 M                   | 5.5 (2.2-7.4)*                            |  |
| 135 | 2014 | Foissac         | France                       | Analytic<br>Observational      | To investigate the population pharmacokinetics of 25-hydroxycholecalciferol D in HIV-1-infected children and adolescents                                                                                                                                             | HIV+         | 91 HIV+                  | 44 F<br>47 M                   | 15.0 (11-17)*<br>14.0 (10-17)*            |  |
| 136 | 2014 | Hillesheim      | Brazil                       | Descriptive                    | To investigate the nutritional status and dietary intake of HIV-infected                                                                                                                                                                                             | HIV+         | 49 HIV+                  | 24 F                           | 12.4 (3.0)                                |  |

|     |      |             |                                                     |                                          |                                                                                                                                                                                                                                                                                          |              |                          |                                 |                                          |
|-----|------|-------------|-----------------------------------------------------|------------------------------------------|------------------------------------------------------------------------------------------------------------------------------------------------------------------------------------------------------------------------------------------------------------------------------------------|--------------|--------------------------|---------------------------------|------------------------------------------|
|     |      |             |                                                     | Correlational                            | children                                                                                                                                                                                                                                                                                 |              |                          | 25 M                            | 12.8 (2.3)                               |
| 137 | 2014 | Humphries   | South Africa                                        | Descriptive<br>Correlational             | To compare the muscle strength of children infected with HIV who had been receiving ART to that of children infected with HIV not receiving ART                                                                                                                                          | HIV+         | 32 HIV+                  | NR                              | 6.0 (1.2)                                |
| 138 | 2014 | Mussime     | Uganda<br>Zambia                                    | Analytic<br>Case-control                 | To compare anthropometric measurements and lipid profile in HIV-infected children and HIV-uninfected children                                                                                                                                                                            | HIV+<br>HIV- | 408 HIV+<br><br>88 HIV-  | 205 F<br>203 M<br>49 F<br>39 M  | 2.5 (1.5-4.0)*<br><br>2.2 (1.5-3.0)*     |
| 139 | 2014 | Theodoridou | Greece                                              | Analytic<br>Case-control                 | To investigate the non-traditional adipokines Retinol-binding-Protein-4, neutrophil-gelatinase-associated-lipocalin, $\alpha$ -Fatty-Acid-Binding-Protein and YKL-40 in HIV-infected children on ART                                                                                     | HIV+<br>HIV- | 17 HIV+<br><br>20 HIV-   | 10 F<br>7 M<br>NR               | 12.5 (3.98)<br>(6.0 to 15.0)             |
| 140 | 2014 | Vreeman     | Kenya                                               | Analytic<br>Observational                | To assess prospective nevirapine pharmacokinetics parameters in HIV-infected Kenyan children and to use mixed-effects modeling to assess sources of variation in prospective nevirapine pharmacokinetics parameters and drug exposure, focusing on body composition and adherence to ART | HIV+         | 21 HIV+                  | 12 F<br>9 M                     | 4.4 (NR)                                 |
| 141 | 2015 | Aurpibul    | Thailand                                            | Analytic<br>Open label<br>Clinical trial | To evaluate the efficacy, safety and pharmacokinetics of tenofovir disoproxil fumarate in treatment-experienced children during 96 weeks                                                                                                                                                 | HIV+         | 80 HIV+                  | 45 F<br>35 M                    | 11.5 (3.5)                               |
| 142 | 2015 | Cohen       | Netherlands<br>South Africa                         | Analytic<br>Case-control                 | To assess changes over time in regional fat mass in combination ART-treated, HIV-infected children on two continents                                                                                                                                                                     | HIV+<br>HIV- | 175 HIV+<br><br>43 HIV-  | 85 F<br>90 M<br>20 F<br>23 M    | 7.4 (5.1-10.2)*<br><br>5.2 (5.0-5.7)*    |
| 143 | 2015 | Della Negra | Brazil<br>Panama                                    | Analytic<br>Open label<br>Clinical trial | To present final results from the open-label tenofovir disoproxil fumarate extension following the randomized, placebo-controlled, double-blind phase of GS-US-104-0321 (Study 321)                                                                                                      | HIV+         | 81 HIV+                  | 46 F<br>35 M                    | 14.0 (13.0-16.0)*                        |
| 144 | 2015 | dos Reis    | Brazil                                              | Descriptive<br>Correlational             | To investigate the relationship between anthropometric parameters and body composition of perinatally HIV-infected children and adolescents under ART, according to use and non-use of PI                                                                                                | HIV+         | 115 HIV+                 | 60 F<br>55 M                    | 11.8 (2.9)                               |
| 145 | 2015 | Mora        | Italy                                               | Analytic<br>Case-control                 | To investigate the relationship between measurements of sclerostin and Dickkopf1 with bone formation and metabolism in HIV-infected and control subjects                                                                                                                                 | HIV+<br>HIV- | 54 HIV+<br><br>105 HIV-  | 35 F<br>19 M<br>57 F<br>48 M    | 13.6 (5.6-19.4)*<br><br>11.5 (4.5-17.7)* |
| 146 | 2015 | Palchetti   | Brazil                                              | Analytic<br>Observational                | To evaluate bone mass accrual and determine the influence of clinical, anthropometric, dietary, and biochemical parameters on bone mass                                                                                                                                                  | HIV+         | 35 HIV+                  | 18 F<br>17 M                    | 9.6 (1.1)                                |
| 147 | 2015 | Swetha      | India                                               | Analytic<br>Observational                | To assess the growth and morbidity status of HIV infected children over a period of one year in a city in southern India                                                                                                                                                                 | HIV+         | 77 HIV+                  | 40 F<br>37 M                    | 9.3 (0.5)<br>9.0 (0.6)                   |
| 148 | 2016 | Arpadi      | South Africa                                        | Analytic<br>Case-control                 | To compare bone mass of South African HIV-infected children initiated on ART early in life with an HIV-uninfected control group                                                                                                                                                          | HIV+<br>HIV- | 219 HIV+<br><br>219 HIV- | 112 F<br>107 M<br>99 F<br>120 M | 6.4 (1.2)<br><br>7.0 (1.5)               |
| 149 | 2016 | Gaur        | South Africa<br>Uganda<br>Thailand<br>United States | Analytic<br>Open label<br>Clinical trial | To assess safety, pharmacokinetics, and efficacy of this single-tablet, fixed-dose combination of elvitegravir, cobicistat, emtricitabine, and tenofovir alafenamide in HIV-infected, treatment-naïve adolescents                                                                        | HIV+         | 50 HIV+                  | 28 F<br>22 M                    | 15 (12-17)*                              |
| 150 | 2016 | Lima        | Brazil                                              | Descriptive<br>Method Validity           | To develop predictive equations for bone mineral content and bone mineral density in children and adolescents living with HIV based on                                                                                                                                                   | HIV+         | 48 HIV+                  | 24 F<br>24 M                    | 12.7 (9.4-15.0)*<br>13.2 (11.1-14.7)*    |

| anthropometric variables |      |             |                       |                             |                                                                                                                                                                                                                  |              |                          |                                  |                                           |  |
|--------------------------|------|-------------|-----------------------|-----------------------------|------------------------------------------------------------------------------------------------------------------------------------------------------------------------------------------------------------------|--------------|--------------------------|----------------------------------|-------------------------------------------|--|
| 151                      | 2016 | Sonego      | El Salvador           | Descriptive Correlational   | To estimate the prevalence of dyslipidemia in children on ART in El Salvador                                                                                                                                     | HIV+         | 173 HIV+                 | 80 F<br>93 M                     | 10. (3.0)                                 |  |
| 152                      | 2016 | Sudjaritruk | Thailand<br>Indonesia | Descriptive Correlational   | To determine the prevalence of hypovitaminosis D and hyperparathyroidism and their effects on bone turnover and BMD among HIV-infected adolescents in Southeast Asia                                             | HIV+         | 394 HIV+                 | 225 F<br>169 M                   | 15.0 (13.3-16.9)*                         |  |
| 153                      | 2016 | Wong        | South Africa          | Analytic Case-control       | To describe physical activity in South African children with and without HIV                                                                                                                                     | HIV+<br>HIV- | 218 HIV+<br><br>180 HIV- | 110 F<br>108 M<br>81 F<br>99 M   | 6.0 (5.4-7.0)*<br><br>7.1 (5.7-8.6)*      |  |
| 154                      | 2017 | Carmo       | Brazil                | Analytic Observational      | To evaluate the prevalence of BMD alterations and vitamin D concentrations in HIV-infected children and adolescents                                                                                              | HIV+         | 58 HIV+                  | 35 F<br>23 M                     | 14.2 (5.8-18.3)*                          |  |
| 155                      | 2017 | de Lima     | Brazil                | Analytic Case-control       | To examine aerobic fitness, total moderate to vigorous physical activity and also patterns in terms of moderate to vigorous physical activity between children and adolescents with HIV and controls             | HIV+<br>HIV- | 65 HIV+<br><br>65 HIV-   | 35 F<br>30 M<br>35 F<br>30 M     | 12.2 (2.1)<br><br>12.1 (1.8)              |  |
| 156                      | 2017 | Giacomet    | Italy                 | Analytic Case-control       | To assess the long-term effect of tenofovir disoproxil fumarate on bone mineral density in young patients                                                                                                        | HIV+<br>HIV- | 26 HIV+<br><br>202 HIV-  | 13 F<br>13 M<br>100 F<br>102 M   | 12.1 (5.0- 17.3)*<br><br>12.5 (5.2)       |  |
| 157                      | 2017 | Jacobson    | United States         | Analytic Case-control       | To evaluate associations of low 25 hydroxy vitamin D and high parathyroid hormone concentrations with total body and spine BMD and BMC in HIV-infected children                                                  | HIV+<br>HIV- | 412 HIV+<br><br>207 HIV- | 217 F<br>195 M<br>101 F<br>106 M | 13.0 (10.6-14.7)*<br><br>10.8 (9.0-12.8)* |  |
| 158                      | 2017 | Jiménez     | Spain                 | Descriptive Correlational   | To determine the prevalence and risk factors associated with low BMD in vertically HIV-infected patients                                                                                                         | HIV+         | 98 HIV+                  | 69 F<br>29 M                     | 15.9 (12.9-17.0)*                         |  |
| 159                      | 2017 | de Lima     | Brazil                | Descriptive Method Validity | To assess the validity of traditional anthropometric equations and to develop predictive equations of total body and trunk fat for children and adolescents living with HIV based on anthropometric measurements | HIV+         | 48 HIV+                  | 24 F<br>24 M                     | 12.4 (9.4-15.0)*<br>13.2 (11.1-14.7)*     |  |
| 160                      | 2017 | de Lima     | Brazil                | Analytic Experimental       | To verify the effect of a playful exercise program on cardiovascular, morphological, metabolic, fitness, and quality of life outcomes                                                                            | HIV+         | 10 HIV+                  | 9 F<br>1 M                       | 13.0 (11.5-15.5)*                         |  |
| 161                      | 2017 | MacDonald   | Canada                | Analytic Case-control       | To compare muscle power between youth who acquired HIV perinatally and HIV unexposed uninfected youth                                                                                                            | HIV+<br>HIV- | 35 HIV+<br><br>716 HIV-  | 17 F<br>20 M<br>339 F<br>377 M   | 13.9 (8.5-21.3)*<br><br>(9 to 21)         |  |
| 162                      | 2017 | Martins     | Brazil                | Analytic Case-control       | To compare regular physical activity among adolescents living with HIV with their healthy peers, and to evaluate the relationship with anthropometric indicators of body fat                                     | HIV+<br>HIV- | 57 HIV+<br><br>54 HIV-   | 33 F<br>24 M<br>28 F<br>26 M     | 13.0 (1.5)<br><br>12.8 (2.3)              |  |
| 163                      | 2017 | Risti       | Indonesia             | Descriptive Correlational   | To study the level vitamin D and calcium serum with mandibular bone density in HIV/AIDS children                                                                                                                 | HIV+         | 40 HIV+                  | NR                               | (6 to 15)                                 |  |
| 164                      | 2017 | Sudjaritruk | Thailand<br>Indonesia | Descriptive Correlational   | To determine the prevalence of low bone mass and assess its relationship with abnormal bone turnover among HIV-infected Asian adolescents                                                                        | HIV+         | 396 HIV+                 | 226 F<br>170 M                   | 15.0 (13.3-16.9)*                         |  |
| 165                      | 2017 | Sudjaritruk | Thailand<br>Indonesia | Descriptive Correlational   | To determine the prevalence of hypovitaminosis D and hyperparathyroidism and their effects on bone turnover and BMD                                                                                              | HIV+         | 394 HIV+                 | 225 F<br>169 M                   | 16.1 (14.7-17.4)*                         |  |



|                                                  |      |            |               |                                |                                                                                                                                                                                                                                                                  |              |                      |                                  |                                        |
|--------------------------------------------------|------|------------|---------------|--------------------------------|------------------------------------------------------------------------------------------------------------------------------------------------------------------------------------------------------------------------------------------------------------------|--------------|----------------------|----------------------------------|----------------------------------------|
| among HIV-infected adolescents in Southeast Asia |      |            |               |                                |                                                                                                                                                                                                                                                                  |              |                      |                                  |                                        |
| 166                                              | 2017 | Ziegler    | United States | Analytic<br>Case-control       | To evaluate amino acid concentrations in HIV-infected children and young adults                                                                                                                                                                                  | HIV+<br>HIV- | 79 HIV+<br>40 HIV-   | 41 F<br>38 M<br>19 F<br>21 M     | 9.0 (8.0-24.0)*                        |
| 167                                              | 2018 | Archary    | South Africa  | Analytic<br>Clinical Trial     | To describe the effects of nutritional rehabilitation on Efavirenz and lopinavir pharmacokinetics in severely malnourished HIV-infected children and to explore the relationship between Efavirenz and lopinavir pharmacokinetic exposure and virologic outcomes | HIV+         | 63 HIV+              | 27 F<br>36 M                     | 15.5 (16.3)                            |
| 168                                              | 2018 | Cames      | Senegal       | Descriptive<br>Correlational   | To assess and identify risk factors affecting the prevalence of lipodystrophy in Senegalese children and adolescents on long-term antiretroviral treatment participating in a cohort study.                                                                      | HIV+         | 254 HIV+             | 111 F<br>143 M                   | 10.9 (8.1-14.2)*                       |
| 169                                              | 2018 | de Castro  | Brazil        | Descriptive<br>Method Validity | To determine the validity of body composition analysis by BIA compared to DXA and air displacement plethysmography in children and adolescents with HIV diagnosis                                                                                                | HIV+         | 64 HIV+              | 35 F<br>29 M                     | 12.2 (2.1)<br>12.3 (2.2)               |
| 170                                              | 2018 | de Lima    | Brazil        | Analytic<br>Case-control       | To compare body image and anthropometric indicators among adolescents living with HIV and healthy adolescents                                                                                                                                                    | HIV+<br>HIV- | 57 HIV+<br>54 HIV-   | 32 F<br>25 M<br>28 F<br>26 M     | 13.0 (1.5)<br>12.8 (2.3)               |
| 171                                              | 2018 | de Lima    | Brazil        | Analytic<br>Case-control       | To compare cardiovascular risk factors, chronic inflammation, and carotid intima-media thickness between the HIV and control groups                                                                                                                              | HIV+<br>HIV- | 65 HIV+<br>65 HIV-   | 35 F<br>30 M<br>35 F<br>30 M     | 12.2 (2.1)<br>12.1 (1.8)               |
| 172                                              | 2018 | Innes      | South Africa  | Analytic<br>Experimental       | To explore intracellular stavudine triphosphate levels in children receiving a reduced dose of 0.5 to 0.75 mg/kg of body weight twice daily to investigate whether a similar dose optimization can safely be made                                                | HIV+         | 23 HIV+              | 11 F<br>12 M                     | 8.0 (7.0-9.0)*                         |
| 173                                              | 2018 | Jacobson   | United States | Analytic<br>Case-control       | To evaluate the relationship between body composition and bone mass in HIV-infected and HIV-uninfected children and youth                                                                                                                                        | HIV+<br>HIV- | 236 HIV+<br>143 HIV- | 112 F<br>124 M<br>60 F<br>83 M   | 11.9 (7.1- 24.9)*<br>12.6 (7.1- 22.8)* |
| 174                                              | 2018 | Puthanakit | Thailand      | Analytic<br>Experimental       | To assess the changes in BMD during periods without and with calcium and vitamin D supplementation among HIV-infected adolescents with low BMD                                                                                                                   | HIV+         | 94 HIV+              | 48 F<br>46 M                     | 14.3 (13.0-15.5)*                      |
| 175                                              | 2018 | Ramteke    | South Africa  | Analytic<br>Case-control       | To compare the lipid profiles, growth, and body composition of HIV-infected children, stratified by treatment regimen, to a control group of uninfected children from the same population                                                                        | HIV+<br>HIV- | 553 HIV+<br>300 HIV- | 298 F<br>255 M<br>138 F<br>162 M | 6.9 (5.6-7.8)*<br>7.0 (5.3-8.1)*       |
| 176                                              | 2018 | Rosales    | Mexico        | Descriptive<br>Correlational   | To describe frequency of lipodystrophy secondary to ART in HIV-infected children                                                                                                                                                                                 | HIV+         | 49 HIV+              | 19 F<br>30 M                     | 11.0 (6.0-17.0)*                       |
| 177                                              | 2018 | Sharma     | United States | Analytic<br>Case-control       | To evaluate changes in body composition measured by DXA in a cohort of HIV-infected youth compared with HIV-uninfected controls over a 7-year period                                                                                                             | HIV+<br>HIV- | 156 HIV+<br>79 HIV-  | 86 F<br>70 M<br>31 F<br>48 M     | 14.0 (12.2-14.1)*<br>13.1 (13.3-14.7)* |
| 178                                              | 2018 | Shiau      | South Africa  | Analytic<br>Case-control       | To evaluate the relationships between immune activation, bone turnover, and bone mass in virally suppressed HIV-infected children and HIV-uninfected children                                                                                                    | HIV+<br>HIV- | 219 HIV+<br>180 HIV- | 112 F<br>107 M<br>81 F           | 6.4 (1.2)<br>7.1 (1.6)                 |

|     |      |              |                              |                                |                                                                                                                                                                                                                                                                           |              |                          |                                  |                                          |  |
|-----|------|--------------|------------------------------|--------------------------------|---------------------------------------------------------------------------------------------------------------------------------------------------------------------------------------------------------------------------------------------------------------------------|--------------|--------------------------|----------------------------------|------------------------------------------|--|
|     |      |              |                              |                                |                                                                                                                                                                                                                                                                           |              |                          | 99 M                             |                                          |  |
| 179 | 2018 | Strehlau     | South Africa                 | Analytic<br>Clinical trial     | To evaluate the effects of preemptive substitution of abacavir for stavudine in children initially without lipodystrophy and virally suppressed on a stavudine-containing regimen                                                                                         | HIV+         | 213 HIV+                 | 112 F<br>101 M                   | 4.2 (1.0)                                |  |
| 180 | 2018 | Torrejón     | Chile                        | Descriptive<br>Correlational   | To evaluate BMD in vertically HIV-infected children                                                                                                                                                                                                                       | HIV+         | 53 HIV+                  | 29 F<br>24 M                     | 12.9 (8-18.5)*<br>13.6 (8.3-18.4)*       |  |
| 181 | 2019 | Alves Júnior | Brazil                       | Descriptive<br>Correlational   | To verify the association between anthropometric indicators and body fat percentage estimated by DXA and air displacement plethysmography in HIV children                                                                                                                 | HIV+         | 62 HIV+                  | 34 F<br>28 M                     | 12.8 (NR)                                |  |
| 182 | 2019 | Arpadi       | South Africa                 | Analytic<br>Case-control       | To measure bone quality at the calcaneus among South African children with HIV over a 2-year period by quantitative ultrasound                                                                                                                                            | HIV+<br>HIV- | 220 HIV+<br><br>220 HIV- | 112 F<br>108 M<br>100 F<br>120 M | 6.4 (1.3)<br><br>7.0 (1.5)               |  |
| 183 | 2019 | de Lima      | Brazil                       | Descriptive<br>Correlational   | To investigate if moderate to vigorous physical activity and aerobic fitness are associated with cardiovascular risk factors in HIV-infected children and adolescents                                                                                                     | HIV+         | 65 HIV+                  | 35 F<br>30 M                     | 12.2 (2.1)                               |  |
| 184 | 2019 | de Lima      | Brazil                       | Descriptive<br>Method Validity | To examine the capacity of physiological variables and performance to predict peak oxygen consumption in children and adolescents living with HIV                                                                                                                         | HIV+         | 65 HIV+                  | 35 F<br>30 M                     | 12.0 (10.0-13.0)*                        |  |
| 185 | 2019 | Dona         | Italy                        | Descriptive<br>Correlational   | To assess the prevalence of bone homeostasis alterations in a group of vertically infected patients                                                                                                                                                                       | HIV+         | 47 HIV+                  | 35 F<br>32 M                     | 19.2 (NR)                                |  |
| 186 | 2019 | Gregson      | Zimbabwe                     | Analytic<br>Case-control       | To investigate differences in bone and muscle mass and muscle function between HIV-infected and HIV-uninfected children                                                                                                                                                   | HIV+<br>HIV- | 97 HIV+<br><br>77 HIV-   | 51 F<br>46 M<br>40 F<br>37 M     | 12.7 (2.5)<br><br>10.0 (2.9)             |  |
| 187 | 2019 | Malete       | Botswana                     | Analytic<br>Case-control       | To examine differences in physical activity behaviors as a function of HIV status and sex, to test differences in physical activity self-efficacy, body weight satisfaction, and enjoyment of physical activity as a function of HIV status of youth with and without HIV | HIV+<br>HIV- | 88 HIV+<br><br>162 HIV-  | 44 F<br>44 M<br>94 F<br>68 M     | 18.0 (1.7)<br><br>17.4 (2.4)             |  |
| 188 | 2019 | Malete       | Botswana                     | Analytic<br>Case-control       | To examine the relationship between self-reported physical activity behaviors, fitness level, and cognitive functioning in an HIV+ population                                                                                                                             | HIV+<br>HIV- | 88 HIV+<br><br>162 HIV-  | 44 F<br>44 M<br>94 F<br>68 M     | 18.6 (1.7)<br><br>17.45 (2.4)            |  |
| 189 | 2019 | Margossian   | United States<br>Puerto Rico | Analytic<br>Case-control       | To evaluate associations of bone mineral metabolism marker concentrations with cardiac structure and function in a population of HIV-infected and HIV-exposed uninfected                                                                                                  | HIV+<br>HIV- | 305 HIV+<br><br>180 HIV- | 164 F<br>141 M<br>92 F<br>88 M   | 12.9 (2.7)<br><br>11.1 (2.5)             |  |
| 190 | 2019 | Marsico      | Italy                        | Analytic<br>Case-control       | To evaluate left ventricular function, epicardial adipose tissue, and intima-media thickness in children and adolescents with vertically acquired HIV infection                                                                                                           | HIV+<br>HIV- | 29 HIV+<br><br>29 HIV-   | 16 F<br>13 M<br>16 F<br>13 M     | 13.0 (9.0-18.0)*<br><br>13.6 (9.9-19.0)* |  |
| 191 | 2019 | Martins      | Brazil                       | Descriptive<br>Correlational   | To identify the association of phase angle with physical fitness in children and adolescents infected with HIV                                                                                                                                                            | HIV+         | 64 HIV+                  | 34 F<br>30 M                     | 12.1 (2.0)                               |  |
| 192 | 2019 | de Souza     | Brazil                       | Analytic<br>Case-control       | To evaluate the influence of body composition on the respiratory muscle strength of Amazonian children exposed to ART                                                                                                                                                     | HIV+<br>HIV- | 29 HIV+<br><br>31 HIV-   | 16 F<br>13 M<br>14 F<br>17 M     | 7.8 (2.4)                                |  |

|     |      |              |                              |                              |                                                                                                                                                                                                     |              |                      |                                  |                                                                                |
|-----|------|--------------|------------------------------|------------------------------|-----------------------------------------------------------------------------------------------------------------------------------------------------------------------------------------------------|--------------|----------------------|----------------------------------|--------------------------------------------------------------------------------|
| 193 | 2020 | Jacobson     | United States<br>Brazil      | Analytic<br>Clinical trial   | To evaluate the safety of alendronate, an oral bisphosphonate, and its effect on BMD in children and adolescents with HIV infection and low BMD                                                     | HIV+         | 50 HIV+              | 16 F<br>34 M                     | 16.1 (11.1-23.4)*<br>16.3 (11.2-22.4)*                                         |
| 194 | 2020 | Jacobson     | United States<br>Puerto Rico | Analytic<br>Case-control     | To compare lifetime fracture rates by HIV status and evaluate the association of ART use with fractures in HIV-infected children and adolescents                                                    | HIV+<br>HIV- | 451 HIV+<br>277 HIV- | 220 F<br>192 M<br>101 F<br>105 M | 17.5 (7.6-22.2)*<br>16.7 (9.1-21.9)*                                           |
| 195 | 2020 | Mahtab       | South Africa                 | Analytic<br>Case-control     | To investigate the prevalence and predictors of low BMD among South African perinatally HIV-infected adolescents on ART                                                                             | HIV+<br>HIV- | 407 HIV+<br>92 HIV-  | 205 F<br>202 M<br>50 F<br>42 M   | 14.0 (12.7-15.3)*<br>13.7 (12.0-15.3)*                                         |
| 196 | 2020 | McHugh       | Zimbabwe<br>Malawi           | Descriptive<br>Correlational | To describe the features of HIV-associated chronic lung disease in older children and adolescents living with HIV and to examine the clinical factors associated with chronic lung disease          | HIV+         | 421 HIV+             | 216 F<br>205 M                   | 15.3 (12.7-17.7)*<br>15.6 (12.1-18.2)*                                         |
| 197 | 2020 | Naidoo       | South Africa                 | Analytic<br>Clinical trial   | To investigate the effects of a home exercise program on the exercise endurance of children infected with HIV                                                                                       | HIV+         | 62 HIV+              | 36 F<br>26 M                     | 8.7 (0.6)<br>8.3 (0.8)                                                         |
| 198 | 2020 | Shiau        | South Africa                 | Analytic<br>Clinical trial   | To evaluate if bone turnover levels in HIV-infected children differed between groups close to the time of switch ART                                                                                | HIV+         | 212 HIV+             | 107 F<br>105 M                   | 4.4 (NR)                                                                       |
| 199 | 2020 | Shiau        | South Africa                 | Analytic<br>Case-control     | To compare bone architecture and strength by peripheral quantitative computed tomography in school-aged children HIV+ and uninfected children as controls in South Africa                           | HIV+<br>HIV- | 172 HIV+<br>98 HIV-  | 111 F<br>86 M<br>37 F<br>61 M    | 10.2 (1.4)<br>10.8 (1.8)                                                       |
| 200 | 2021 | Alves Júnior | Brazil                       | Descriptive<br>Correlational | To verify whether there is difference in body fat values assessed by different methods according to the body image perception of HIV-infected children and adolescents.                             | HIV+         | 65 HIV+              | 35 F<br>30 M                     | 12.2 (2.1)                                                                     |
| 201 | 2021 | Andrade      | Brazil                       | Descriptive<br>Correlational | To quantify the reduction of BMD with and without height adjustment                                                                                                                                 | HIV+         | 69 HIV+              | 36 F<br>33 M                     | (5 to 19)                                                                      |
| 202 | 2021 | Bhise        | India                        | Descriptive<br>Correlational | To determine the bone health in HIV+ children on ART                                                                                                                                                | HIV+         | 31 HIV+              | 11 F<br>20 M                     | 13.0 (3.0)                                                                     |
| 203 | 2021 | Braithwaite  | South Africa                 | Analytic<br>Experimental     | To evaluate bone and renal safety outcomes in virologically suppressed adolescents HIV+ after switching to tenofovir disoproxil fumarate                                                            | HIV+         | 50 HIV+              | 26 F<br>24 M                     | 15.5 (15.1-16.1)*                                                              |
| 204 | 2021 | De Medeiros  | Brazil                       | Analytic<br>Experimental     | To analyze the influence of dietary counseling and physical activity on biochemical and metabolic parameters in children and adolescents with HIV                                                   | HIV+         | 10 HIV+              | 7 F<br>3 M                       | 11.0 (4.7)                                                                     |
| 205 | 2021 | Dobe         | Mozambique                   | Descriptive<br>Correlational | To investigate the risk factors for cardiovascular disease in HIV infected children with sustained viral suppression in a low income country in Africa                                              | HIV+         | 77 HIV+              | 35 F<br>42 M                     | 10.0 (8.6-12.0)*                                                               |
| 206 | 2021 | Giacomet     | Italy                        | Analytic<br>Experimental     | To evaluate body composition and glycolipid metabolism in adolescents living with HIV starting a dolutegravir-based regimen                                                                         | HIV+         | 13 HIV+              | 11 F<br>2 M                      | 15.0 (12-19)*                                                                  |
| 207 | 2021 | Jacobson     | United States                | Analytic<br>Case-control     | To describe distributions of immune markers in children and young adults by sex and HIV status, and within groups, investigate associations of immune markers with bone density across Tanner stage | HIV+<br>HIV- | 229 HIV+<br>124 HIV- | 110 F<br>119 M<br>53 F<br>71 M   | 12.5 (10.1-14.8)*<br>12.8 (11.0-15.4)*<br>11.7 (9.1-13.8)*<br>11.9 (8.8-14.0)* |
| 208 | 2021 | Lindsey      | United States<br>Brazil      | Analytic<br>Clinical trial   | To assess the safety of 96 weeks of ART with alendronate                                                                                                                                            | HIV+         | 50HIV+               | 16 F<br>34 M                     | 16.3 (11.1-23.4)*                                                              |
| 209 | 2021 | Martins      | Brazil                       | Descriptive                  | To investigate whether handgrip strength levels are associated with                                                                                                                                 | HIV+         | 65 HIV+              | 35 F                             | 12.7 (10.5-14.0)*                                                              |

|     |      |                |                              |                                          |                                                                                                                                                                                 |              |                      |                                  |                                        |  |
|-----|------|----------------|------------------------------|------------------------------------------|---------------------------------------------------------------------------------------------------------------------------------------------------------------------------------|--------------|----------------------|----------------------------------|----------------------------------------|--|
|     |      |                |                              | Correlational                            | BMC and BMD in HIV-infected children and adolescents                                                                                                                            |              |                      | 30 M                             |                                        |  |
| 210 | 2021 | Martins        | Portugal                     | Descriptive<br>Correlational             | To assess the nutritional status, physical activity, and quality of life in HIV-infected children and adolescents                                                               | HIV+         | 31 HIV+              | NR                               | 14.1 (3.5)                             |  |
| 211 | 2021 | Potterton      | South Africa                 | Analytic<br>Case-control                 | To determine the muscle strength of children perinatally infected with HIV compared with an uninfected control group                                                            | HIV+<br>HIV- | 175 HIV+<br>171 HIV- | 91 F<br>84 M<br>78 F<br>93 M     | 9.3 (1.9)<br>9.2 (1.9)                 |  |
| 212 | 2021 | Rukuni         | Zimbabwe                     | Analytic<br>Case-control                 | To investigate the association of HIV with bone density adjusted for skeletal size in peripubertal children                                                                     | HIV+<br>HIV- | 303 HIV+<br>306 HIV- | 151 F<br>152 M<br>155 F<br>151 M | 12.4 (2.5)<br>12.5 (2.5)               |  |
| 213 | 2021 | Shen           | South Africa                 | Analytic<br>Comparative                  | To evaluate longitudinal trends and associations between bone mass, bone turnover and inflammatory markers among South African children living with HIV and controls            | HIV+<br>HIV- | 220 HIV+<br>220 HIV- | 112 F<br>108 M<br>100 F<br>120 M | 6.4 (1.2)<br>7.0 (1.5)                 |  |
| 214 | 2021 | Su             | South Africa                 | Analytic<br>Case-control                 | To compare total body and regional fat distribution in children HIV+ on suppressive ART regimens with controls                                                                  | HIV+<br>HIV- | 219 HIV+<br>219 HIV- | 112 F<br>107 M<br>99 F<br>120 M  | 6.4 (1.2)<br>7.0 (1.5)                 |  |
| 215 | 2021 | Sudjaritruk    | Thailand                     | Analytic<br>Open label<br>Clinical trial | To evaluate the impact of vitamin D and calcium supplementation on BMD and bone metabolism among HIV-infected Thai adolescents                                                  | HIV+         | 187 HIV+             | 88 F<br>99 M                     | 16.4 (14.5-18.0)*<br>15.7 (14.4-17.5)* |  |
| 216 | 2022 | Alves Júnior   | Brazil                       | Descriptive<br>Correlational             | To test the associations between anthropometric indicators and insulin resistance among children and adolescents diagnosed with HIV                                             | HIV+         | 65 HIV+              | 35 F<br>30 M                     | 12.2 (2.1)<br>12.2 (2.2)               |  |
| 217 | 2022 | Chirindza      | Mozambique                   | Descriptive<br>Correlational             | To determine the body composition, physical fitness and habitual physical activity of children and adolescents living with HIV on ART                                           | HIV+         | 79 HIV+              | 36 F<br>33 M                     | (8 to 14)                              |  |
| 218 | 2022 | de Castro      | Brazil                       | Descriptive<br>Method Validity           | To develop equations to estimate the BMC in children and adolescents diagnosed with HIV                                                                                         | HIV+         | 64 HIV+              | 35 F<br>29 M                     | 12.2 (2.1)                             |  |
| 219 | 2022 | Dirajlal-Fargo | United States<br>Puerto Rico | Analytic<br>Observational                | To investigate the association between gut dysfunction and body fat composition in youth with perinatal HIV                                                                     | HIV+         | 261 HIV+             | 129 F<br>132 M                   | 12.1 (9.9-14.1)*                       |  |
| 220 | 2022 | Mahtab         | South Africa                 | Analytic<br>Case-control                 | To investigate the association of mental health measures with metabolic outcomes                                                                                                | HIV+<br>HIV- | 203 HIV+<br>44 HIV-  | 106 F<br>97 M<br>24 F<br>20M     | 10.7 (9.9-11.4)*<br>10.3 (9.7-11.1)*   |  |
| 221 | 2022 | Martins        | Brazil                       | Descriptive<br>Correlational             | To verify the association between lean mass and hand grip strength in HIV-infected children using ART (with or without PI) or not using ART                                     | HIV+         | 65 HIV+              | NR                               | 12.4 (1.95)                            |  |
| 222 | 2022 | Martins        | Brazil                       | Descriptive<br>Correlational             | To verify the association between fat free mass and lean mass with hand grip strength                                                                                           | HIV+         | 65 HIV+              | 35 F<br>30 M                     | 12.2 (2.1)<br>12.2 (2.2)               |  |
| 223 | 2022 | Melin          | United<br>Kington            | Analytic<br>Case-control                 | To investigate the levels and predictors of arterial stiffness in young people living with perinatal HIV and HIV negative young people                                          | HIV+<br>HIV- | 213 HIV+<br>65 HIV-  | 128 F<br>85 M<br>45 F<br>20 M    | 18 (16-20)*<br>18 (16-21)*             |  |
| 224 | 2022 | Metgud         | India                        | Analytic<br>Case-control                 | To determine the muscle strength, flexibility, and cardiorespiratory endurance in children with HIV and to compare it with age and gender matched typically developing children | HIV+<br>HIV- | 55 HIV+<br>55 HIV-   | 22 F<br>33 M<br>22 F<br>33 M     | 13.3 (2.8)<br>13.3 (2.8)               |  |
| 225 | 2022 | Potterton      | South Africa                 | Analytic                                 | To investigate the sub-maximal endurance of children living with HIV                                                                                                            | HIV+         | 175 HIV+             | 91 F                             | 9.1 (1.8)                              |  |

|     |      |                |                              |                                |                                                                                                                                                                                                                       |              |                      |                                  |                                                      |
|-----|------|----------------|------------------------------|--------------------------------|-----------------------------------------------------------------------------------------------------------------------------------------------------------------------------------------------------------------------|--------------|----------------------|----------------------------------|------------------------------------------------------|
|     |      |                |                              | Case-control                   | compared to a non-infected comparison group                                                                                                                                                                           | HIV-         |                      | 84 M<br>78 F<br>93 M             | 9.4 (2.0)<br>9.1 92.0<br>9.3 (1.9)                   |
| 226 | 2022 | Rego           | South Africa                 | Descriptive<br>Correlational   | To determine the motor function, muscle strength and health-related quality of life in children aged 5–10 years who were perinatally infected with HIV                                                                | HIV+         | 171 HIV-<br>30 HIV+  | 13 F<br>17 M                     | 7.8 (1.7)                                            |
| 227 | 2022 | Roberts        | South Africa                 | Descriptive<br>Method Validity | To evaluates the correlations over one year between two different methods of Quantitative Ultrasound and DXA in HIV-infected young South African                                                                      | HIV+<br>HIV- | 80 HIV+<br>90 HIV-   | 40 F<br>40 M<br>39 F<br>51 M     | 7.1 (1.4)<br>7.3 (1.5)                               |
| 228 | 2022 | Rose           | South Africa                 | Analytic<br>Case-control       | To evaluate the prevalence and risk factors for hepatic steatosis in South African children with perinatally acquired HIV who started treatment early and remain on long-term ART compared to HIV-uninfected children | HIV+<br>HIV- | 110 HIV+<br>105 HIV- | 57 F<br>53 M<br>47 F<br>58 M     | 14.1 (12.7-14.9)*                                    |
| 229 | 2022 | Vargas         | Brazil                       | Descriptive<br>Correlational   | To evaluate bone mass in pediatric patients infected with HIV                                                                                                                                                         | HIV+         | 46 HIV+              | 26 F<br>20 M                     | 7.7 (3.5)                                            |
| 230 | 2022 | Zanlorenci     | Brazil                       | Descriptive<br>Correlational   | To investigate physical growth parameters associated with BMD and BMC among children and adolescents diagnosed with HIV                                                                                               | HIV+         | 63 HIV+              | 35 F<br>28 M                     | 12.1 (1.2)                                           |
| 231 | 2022 | Zanlorenci     | Brazil                       | Descriptive<br>Correlational   | To verify the prevalence and factors associated with body image dissatisfaction in children and adolescents diagnosed with HIV infection                                                                              | HIV+         | 60 HIV+              | 32 F<br>28 M                     | 11.9 (1.9)<br>12.0 (2.1)                             |
| 232 | 2023 | Alves Júnior   | Brazil                       | Descriptive<br>Correlational   | To identify the discriminatory capacity of anthropometric parameters for high body fat in children and adolescents with HIV                                                                                           | HIV+         | 65 HIV+              | 35 F<br>30 M                     | 12.8 (8.9)                                           |
| 233 | 2023 | Alves Júnior   | Brazil                       | Descriptive<br>Correlational   | To verify the presence of difference in the lipid and glycemic profile in relation to different total body and trunk fat phenotypes in children and adolescents diagnosed with HIV                                    | HIV+         | 62 HIV+              | 34 F<br>28 M                     | 12.2 (2.1)                                           |
| 234 | 2023 | Comley-White   | South Africa                 | Analytic<br>Case-control       | To establish the physical sequelae of perinatal HIV in adolescents                                                                                                                                                    | HIV+<br>HIV- | 147 HIV+<br>102 HIV- | 74 F<br>73 M<br>42 F<br>60 M     | 12 (2)<br>12 (1)                                     |
| 235 | 2023 | Davies         | South Africa                 | Analytic<br>Case-control       | To evaluate the longitudinal trajectory of insulin resistance and dyslipidemia in children living with HIV and HIV-exposed uninfected children, compared with children HIV-unexposed                                  | HIV+<br>HIV- | 141 HIV+<br>344 HIV- | 77 F<br>64 M<br>163 F<br>181 M   | 8.7 (8.4-9.52)*<br>9.4 (8.1-10.58)*                  |
| 236 | 2023 | Dirajlal-Fargo | United States<br>Puerto Rico | Descriptive<br>Correlational   | To assess the association of changes in adiposity over 2 years with metabolic outcomes in young people living with HIV                                                                                                | HIV+         | 232 HIV+             | 122 F<br>110 M                   | 12.25 (9.7-14.2)*                                    |
| 237 | 2023 | Franco-Oliva   | Mexico                       | Analytic<br>Case-control       | To compare the resting energy expenditure of asymptomatic HIV-infected pediatric patients with healthy counterparts and to compare body composition, dietary intake, and physical activity between the two groups     | HIV+<br>HIV- | 39 HIV+<br>39 HIV-   | 14 F<br>25 M<br>14 F<br>25 M     | 11.6 (3.5)<br>11.6 (3.4)                             |
| 238 | 2023 | Gregson        | Zimbabwe                     | Analytic<br>Case-control       | To investigate the effect of HIV infection on muscle mass and function in peripubertal children established on ART and to what extent any identified deficits could be explained by impaired muscle quality           | HIV+<br>HIV- | 303 HIV+<br>306 HIV- | 151 F<br>152 M<br>155 F<br>151 M | 12.4 (2.6)<br>12.2 (2.5)<br>12.6 (2.5)<br>12.4 (2.5) |
| 239 | 2023 | Iheme          | Nigeria                      | Descriptive<br>Correlational   | To evaluate the health-related quality of life and nutritional status of adolescents and adults living with HIV/AIDS                                                                                                  | HIV+         | 100 HIV+             | 52 F<br>48 M                     | (11 to 19)                                           |
| 240 | 2023 | Maina          | Kenya                        | Descriptive                    | To examine the direct effects of stunting on cognitive outcomes and                                                                                                                                                   | HIV+         | 328 HIV+             | 148 F                            | 9.56 (1.2)                                           |

|     |      |                |                    |                              |                                                                                                                                                                                               |              |                          |                                  |                                                      |
|-----|------|----------------|--------------------|------------------------------|-----------------------------------------------------------------------------------------------------------------------------------------------------------------------------------------------|--------------|--------------------------|----------------------------------|------------------------------------------------------|
|     |      |                |                    | Correlational                | the extent to which stunting (partially) mediates the effects of HIV, age, and gender on cognitive outcomes                                                                                   | HIV-         | 260 HIV-                 | 125 M<br>163 F<br>166 M          | 9.41 (1.4)                                           |
| 241 | 2023 | Martins        | Brazil             | Descriptive<br>Correlational | To investigate how phase angle is associated with body composition in children and adolescents with HIV according to sex                                                                      | HIV+         | 64 HIV+                  | 35 F<br>29 M                     | 12.2 (2.1)<br>12.2 (2.2)                             |
| 242 | 2023 | Mukwasi-Kahari | Zimbabwe           | Analytic<br>Case-control     | To determine the association between chronic HIV infection and bone architecture (density, size, strength) in peripubertal children                                                           | HIV+<br>HIV- | 303 HIV+<br><br>301 HIV- | 151 F<br>152 M<br>155 F<br>151 M | 12.4 (2.6)<br>12.5 (2.5)<br>12.6 (2.5)<br>12.4 (2.5) |
| 243 | 2023 | Natukunda      | Uganda             | Descriptive<br>Correlational | To determine the prevalence and factors associated with low bone mass density among children living with HIV                                                                                  | HIV+         | 159 HIV+                 | 80 F<br>79 M                     | 10.0 (7.0-12.0)*                                     |
| 244 | 2023 | Olibamoyo      | Nigeria            | Analytic<br>Case-control     | To determine the mean serum vitamin E levels and its associations with the immunologic status, the nutritional status, and the use of highly active antiretroviral drugs in children with HIV | HIV+<br>HIV- | 70 HIV+<br><br>70 HIV-   | 35 F<br>35 M<br>35F<br>35M       | 7.3 (3.8-10.0)*<br><br>7.3 (3.8-10.0)*               |
| 245 | 2023 | Rehman         | Zimbabwe<br>Malawi | Analytic<br>Case-control     | To characterize growth relative to population norms among adolescents in southern Africa                                                                                                      | HIV+<br>HIV- | 303 HIV+<br><br>306 HIV- | 151 F<br>152 M<br>155 F<br>151M  | 12.4 (2.5)<br><br>12.5 (2.5)                         |
| 246 | 2023 | Rukuni         | Zimbabwe           | Analytic<br>Case-control     | To determine the prevalence of self-reported fracture, associated risk factors and disability, by HIV status in Zimbabwean children                                                           | HIV+<br>HIV- | 303 HIV+<br><br>306 HIV- | 151 F<br>152 M<br>155 F<br>151 M | 12.5 (2.5)<br><br>12.5 (2.5)                         |

SD: standard deviation; HIV or HIV-1: human immunodeficiency virus; HIV+: HIV-diagnosed; HIV-: without HIV infection diagnosis; F: females; M: males; NR: not reported; PI: protease inhibitors; ART: antiretroviral therapy; BIA: bioelectrical impedance analysis; DXA: dual energy X-ray absorptiometry; AIDS: acquired immunodeficiency syndrome; VO2: oxygen consumption; \*median and age range.

**Supplementary Table S2.** Health-related physical fitness components investigated and physical activity level (protocols/tests and cut-points applied)

| N° | Year | First Author | Groups    | Investigated component (s) | Investigated                | Method/protocol                                                                                                                                              | Cut-points                                                                                       | PA level method/protocol | PA level Cut-points |
|----|------|--------------|-----------|----------------------------|-----------------------------|--------------------------------------------------------------------------------------------------------------------------------------------------------------|--------------------------------------------------------------------------------------------------|--------------------------|---------------------|
| 1  | 1995 | Miller       | HIV+      | Body composition           | Changes in Body composition | Anthropometric: body mass, height, body mass-for-height, Triceps SF, arm relaxed circumference, arm muscular circumference                                   | Growth curves (NCHS/WHO)                                                                         | NI                       | NI                  |
| 2  | 1995 | Saavedra     | HIV+ HIV- | Body composition           | Changes in Body composition | Anthropometric: height, body mass, head circumference                                                                                                        | Growth curves (NCHS/WHO)                                                                         | NI                       | NI                  |
| 3  | 1996 | Arpadi       | HIV+      | Body composition           | Method validity             | Anthropometric: body mass, height; BIA: total body water; fat-free mass; Deuterium dilution: total body water; DXA: fat-free mass                            | NR                                                                                               | NI                       | NI                  |
| 4  | 1997 | Miller       | HIV+      | Body composition           | Associations                | Anthropometric: body mass, height, body mass-for-height, Triceps SF, arm relaxed circumference, arm muscular circumference                                   | Growth curves (NCHS/WHO); Ten-State Nutrition Survey (arm muscular circumference and Triceps SF) | NI                       | NI                  |
| 5  | 1998 | Arapadi      | HIV+ HIV- | Body composition           | Groups comparison           | Anthropometric: body mass, height, Triceps SF, arm relaxed circumference, arm muscular circumference; DXA: body fat mass, body fat percentage, fat-free mass | NR                                                                                               | NI                       | NI                  |
| 6  | 1998 | Henderson    | HIV+ HIV- | Body composition           | Groups comparison           | Anthropometric: body mass, height, Triceps SF, arm relaxed circumference, arm muscular circumference; Deuterium dilution: total body water                   | Growth curves (NCHS/WHO)                                                                         | NI                       | NI                  |
| 7  | 1999 | Fontana      | HIV+ HIV- | Body composition           | Groups comparison           | Anthropometric: body mass, height, arm relaxed circumference, Triceps SF, arm muscular circumference, arm area; BIA: fat-free mass                           | Z-scores                                                                                         | NI                       | NI                  |
| 8  | 1999 | Fox-Wheeler  | HIV+      | Body composition           | Changes in Body composition | Anthropometric: body mass, height, Triceps SF, arm relaxed circumference, arm muscular circumference, BMI; Computed Tomography: bone area                    | Not applied                                                                                      | NI                       | NI                  |
| 9  | 2000 | Arpadi       | HIV+      | Body composition           | Associations                | Anthropometric: body mass, height; DXA: fat-free mass; Deuterium dilution: total body water                                                                  | Percentiles                                                                                      | NI                       | NI                  |
| 10 | 2000 | Fiore        | HIV+      | Body composition           | Associations                | Anthropometric: body mass, height, BMI                                                                                                                       | Percentiles                                                                                      | NI                       | NI                  |
| 11 | 2000 | Heller       | HIV+      | Body composition           | Method validity             | Anthropometric: body mass, height, BMI, Triceps SF, arm relaxed circumference, arm muscular circumference                                                    | Growth curves (NCHS/WHO)                                                                         | NI                       | NI                  |
| 12 | 2000 | Jansen       | HIV+ HIV- | Body composition           | Associations                | Anthropometric: body mass, height, Triceps SF, arm relaxed circumference, arm muscular circumference, body fat percentage                                    | Growth curves (NCHS/WHO)                                                                         | NI                       | NI                  |

|    |      |           |              |                                               |                             |                                                                                                                                                                                                                 |                                                                                                   |    |    |
|----|------|-----------|--------------|-----------------------------------------------|-----------------------------|-----------------------------------------------------------------------------------------------------------------------------------------------------------------------------------------------------------------|---------------------------------------------------------------------------------------------------|----|----|
| 13 | 2000 | Jaquet    | HIV+         | Body composition                              | Prevalences                 | Anthropometric: body mass, height, BMI, Biceps SF, Triceps SF, Suprailiac SF, Subscapular SF                                                                                                                    | French Growth curves                                                                              | NI | NI |
| 14 | 2000 | Keyser    | HIV+         | Body composition<br>Cardiorespiratory fitness | Prevalences                 | Anthropometric: body mass, height<br>Maximum effort treadmill test:<br>heart rate; peak oxygen consumption                                                                                                      | Not applied<br><br>ACSM Guidelines                                                                | NI | NI |
| 15 | 2000 | Mismer    | HIV+         | Body composition                              | Changes in Body composition | Anthropometric: body mass, height, Triceps SF, arm relaxed circumference, arm muscular circumference                                                                                                            | Growth curves (NCHS/WHO);<br>Ten-State Nutrition Survey (arm muscular circumference e Triceps SF) | NI | NI |
| 16 | 2001 | Arpadi    | HIV+         | Body composition                              | Changes in Body composition | Anthropometric: body mass, height, BMI;<br>DXA: body fat mass                                                                                                                                                   | Z-scores                                                                                          | NI | NI |
| 17 | 2001 | Brambilla | HIV+<br>HIV- | Body composition                              | Groups comparison           | Anthropometric: body mass, height, BMI;<br>DXA: body fat mass, lean mass;<br>Magnetic Resonance Imaging: visceral fat                                                                                           | Not applied                                                                                       | NI | NI |
| 18 | 2001 | Dreimane  | HIV+         | Body composition                              | Changes in Body composition | Anthropometric: body mass, height                                                                                                                                                                               | Not applied                                                                                       | NI | NI |
| 19 | 2001 | Ellis     | HIV+<br>HIV- | Body composition                              | Method validity             | Anthropometric: body mass, height, BMI;<br>DXA: bone mass content, bone mass density, bone area                                                                                                                 | Not applied                                                                                       | NI | NI |
| 20 | 2001 | Melvin    | HIV+         | Body composition                              | Groups comparison           | Anthropometric: body mass, height, BMI, waist circumference, hip circumference, waist-to-height ration, Triceps SF, Subscapular SF, Abdominal SF, Thigh SF;<br>DXA: body fat mass, lean mass, bone mass density | Not applied                                                                                       | NI | NI |
| 21 | 2001 | Miller    | HIV+         | Body composition                              | Changes in Body composition | Anthropometric: body mass, height, body mass-for-height, Triceps SF, arm relaxed circumference, arm muscular circumference                                                                                      | Growth curves (NCHS/WHO);<br>Ten-State Nutrition Survey (arm muscular circumference e Triceps SF) | NI | NI |
| 22 | 2001 | Mora      | HIV+<br>HIV- | Body composition                              | Groups comparison           | Anthropometric: body mass, height, BMI;<br>DXA: bone mass density                                                                                                                                               | Not applied                                                                                       | NI | NI |
| 23 | 2001 | O'Brien   | HIV+         | Body composition                              | Associations                | Anthropometric: body mass, height, BMI;<br>DXA: body fat percentage, lean mass, bone mass content, bone mass density                                                                                            | Growth curves (NCHS/WHO);<br>Previous study (sample HIV-)                                         | NI | NI |
| 24 | 2001 | Tan       | HIV+<br>HIV- | Body composition                              | Groups comparison           | Anthropometric: body mass, height                                                                                                                                                                               | Growth curves (NCHS/WHO)                                                                          | NI | NI |
| 25 | 2002 | Amaya     | HIV+         | Body composition                              | Associations                | Anthropometric: body mass, height, BMI, hip circumference, abdominal girth                                                                                                                                      | Not applied                                                                                       | NI | NI |
| 26 | 2002 | Arpadi    | HIV+         | Body composition                              | Groups comparison           | Anthropometric: body mass, height, BMI;                                                                                                                                                                         | Z-scores                                                                                          | NI | NI |



|    |      |             |              |                                                  |                                |                                                                                                                                                                                                                                                                                    |                                 |                             |    |             |
|----|------|-------------|--------------|--------------------------------------------------|--------------------------------|------------------------------------------------------------------------------------------------------------------------------------------------------------------------------------------------------------------------------------------------------------------------------------|---------------------------------|-----------------------------|----|-------------|
|    |      |             | HIV-         |                                                  |                                | DXA: bone mass content                                                                                                                                                                                                                                                             |                                 |                             |    |             |
| 27 | 2002 | Cade        | HIV+<br>HIV- | Body composition<br>Cardiorespiratory<br>fitness | Groups comparison              | Anthropometric: body mass, height, BMI, lean<br>body mass index;<br>Maximum effort treadmill test: heart rate peak;<br>peak oxygen consumption                                                                                                                                     | Not applied                     | NR                          |    | NR          |
| 28 | 2002 | Cossarizza  | HIV+<br>HIV- | Body composition                                 | Groups comparison              | Anthropometric: body mass, height, BMI;<br>DXA: body fat mass, lean mass                                                                                                                                                                                                           | Not applied                     | NI                          |    | NI          |
| 29 | 2002 | Horlick     | HIV+<br>HIV- | Body composition                                 | Method validity                | Anthropometric: body mass, height, BMI;<br>DXA: fat-free mass;<br>Deuterium dilution: total body water;<br>BIA: resistance, impedance                                                                                                                                              | Z-scores                        | NI                          |    | NI          |
| 30 | 2002 | Nachman     | HIV+         | Body composition                                 | Groups comparison              | Anthropometric: body mass, height                                                                                                                                                                                                                                                  | Growth curves<br>(NCHS/WHO)     | NI                          |    | NI          |
| 31 | 2002 | Rondanelli  | HIV+<br>HIV- | Body composition                                 | Groups comparison              | Anthropometric: body mass, height, BMI,<br>Biceps SF, Triceps SF, Suprailiac SF,<br>Subscapular SF, arm relaxed circumference,<br>arm muscular circumference                                                                                                                       | Not applied                     | Structured<br>questionnaire |    | Not applied |
| 32 | 2002 | Verweel     | HIV+         | Body composition                                 | Changes in Body<br>composition | Anthropometric: body mass, height, BMI                                                                                                                                                                                                                                             | Dutch<br>curves                 | Growth                      | NI | NI          |
| 33 | 2003 | Beregszaszi | HIV+<br>HIV- | Body composition                                 | Groups comparison              | Anthropometric: body mass, height, BMI,<br>Suprailiac SF, Biceps SF, Triceps SF,<br>Subscapular SF;<br>BIA: body fat percentage                                                                                                                                                    | French<br>curves                | Growth                      | NI | NI          |
| 34 | 2003 | Bitnun      | HIV+         | Body composition                                 | Groups comparison              | Anthropometric: body mass, height, BMI, waist<br>circumference, hip circumference, waist-to-hip<br>ratio;<br>Computed Tomography:<br>visceral fat                                                                                                                                  | Not applied                     | NI                          |    | NI          |
| 35 | 2003 | Bockhorst   | HIV+         | Body composition                                 | Groups comparison              | Anthropometric: body mass, height, BMI                                                                                                                                                                                                                                             | Not applied                     | NI                          |    | NI          |
| 36 | 2003 | McComsey    | HIV+         | Body composition                                 | Changes in Body<br>composition | Anthropometric: body mass, height, BMI,<br>Suprailiac SF, Biceps SF, Triceps SF,<br>Subscapular SF, thigh circumference, arm<br>relaxed circumference, Triceps SF, Thigh SF,<br>waist-to-hip ratio;<br>BIA: body fat mass, body fat percentage, lean<br>mass, lean mass percentual | Not applied                     | NI                          |    | NI          |
| 37 | 2003 | Vigano      | HIV+         | Body composition                                 | Groups comparison              | Anthropometric: body mass, height, BMI;<br>DXA: body fat mass, body fat percentage, lean<br>mass;<br>Magnetic Resonance Imaging: visceral fat                                                                                                                                      | Not applied                     | NI                          |    | NI          |
| 38 | 2003 | Vigano      | HIV+<br>HIV- | Body composition                                 | Groups comparison              | Anthropometric: body mass, height, BMI;<br>DXA: body fat mass, body fat percentage, lean<br>mass;<br>Magnetic Resonance Imaging: visceral fat                                                                                                                                      | Not applied                     | NI                          |    | NI          |
| 39 | 2003 | Zamboni     | HIV+         | Body composition                                 | Associations                   | Anthropometric: body mass, height, BMI;<br>DXA: bone mass density                                                                                                                                                                                                                  | Previous study<br>(sample HIV-) | NI                          |    | NI          |
| 40 | 2004 | Ghaffari    | HIV+         | Body composition                                 | Groups comparison              | Anthropometric: body mass, height                                                                                                                                                                                                                                                  | Growth curves                   | NI                          |    | NI          |

|    |      |                    |              |                  |                             |                                                                                                                                      |                                                                                                         |    |             |
|----|------|--------------------|--------------|------------------|-----------------------------|--------------------------------------------------------------------------------------------------------------------------------------|---------------------------------------------------------------------------------------------------------|----|-------------|
|    |      |                    |              |                  |                             |                                                                                                                                      | (NCHS/WHO)                                                                                              |    |             |
| 41 | 2004 | Hardin             | HIV+<br>HIV- | Body composition | Groups comparison           | Anthropometric: body mass, height;<br>DXA: lean mass                                                                                 | Not applied                                                                                             | NI | NI          |
| 42 | 2004 | Mora               | HIV+<br>HIV- | Body composition | Groups comparison           | Anthropometric: body mass, height;<br>DXA: bone mass density                                                                         | Z-scores                                                                                                | NR | Not applied |
| 43 | 2004 | Panamonta          | HIV+         | Body composition | Associations                | Anthropometric: body mass, height                                                                                                    | Thai reference values                                                                                   | NI | NI          |
| 44 | 2004 | Rojo               | HIV+         | Body composition | Associations                | Anthropometric: body mass, height, BMI;<br>DXA: bone mass density                                                                    | (bone mass density)<br>Osteoporosis<br>WHO taskforce                                                    | NI | NI          |
| 45 | 2004 | Stagi              | HIV+<br>HIV- | Body composition | Groups comparison           | Anthropometric: body mass, height, BMI                                                                                               | Previous study (sample HIV-)                                                                            | NI | NI          |
| 46 | 2004 | Taylor             | HIV+         | Body composition | Groups comparison           | Physical examination: visual inspection of fat distribution                                                                          | Not applied                                                                                             | NI | NI          |
| 47 | 2004 | Thotne             | HIV+         | Body composition | Associations                | Anthropometric: body mass, height, BMI                                                                                               | Not applied                                                                                             | NI | NI          |
| 48 | 2005 | Aldámiz-Echevarría | HIV+<br>HIV- | Body composition | Groups comparison           | Anthropometric: body mass, height, BMI                                                                                               | Spanish Growth curves                                                                                   | NI | NI          |
| 49 | 2005 | Bitnun             | HIV+         | Body composition | Associations                | Anthropometric: body mass, height, BMI, waist circumference, hip circumference, waist-to-hip ratio                                   | Previous study (sample HIV-)                                                                            | NI | NI          |
| 50 | 2005 | Giacomet           | HIV+<br>HIV- | Body composition | Groups comparison           | DXA: bone mass density, bone mass content                                                                                            | Not applied                                                                                             | NI | NI          |
| 51 | 2005 | Hardin             | HIV+         | Body composition | Changes in Body composition | Anthropometric: body mass, height, BMI;<br>DXA: lean mass                                                                            | Z-scores                                                                                                | NI | NI          |
| 52 | 2005 | Hazra              | HIV+         | Body composition | Changes in Body composition | Anthropometric: body mass, height;<br>DXA: bone mass density                                                                         | (bone mass density)<br>Previous study (sample HIV-)                                                     | NI | NI          |
| 53 | 2005 | Jacobson           | HIV+<br>HIV- | Body composition | Groups comparison           | Anthropometric: body mass, height, BMI, arm relaxed circumference, Triceps SF, arm muscular circumference;<br>DXA: bone mass density | Growth curves (NCHS/WHO)<br><i>Ten-State Nutrition Survey</i> (arm muscular circumference e Triceps SF) | NI | NI          |
| 54 | 2005 | Mora               | HIV+<br>HIV- | Body composition | Groups comparison           | Anthropometric: body mass, height, BMI;<br>DXA: bone mass content                                                                    | Not applied                                                                                             | NI | NI          |
| 55 | 2005 | Pitukcheewanont    | HIV+<br>HIV- | Body composition | Groups comparison           | Anthropometric: body mass, height, BMI;<br>DXA: bone mass density;<br>Computed Tomography: bone mass density e bone area             | Z-scores                                                                                                | NI | NI          |
| 56 | 2005 | Rosso              | HIV+<br>HIV- | Body composition | Groups comparison           | Anthropometric: body mass, height, BMI;<br>DXA: bone mass density;                                                                   | Previous study (sample HIV-)                                                                            | NI | NI          |
| 57 | 2005 | Vigano             | HIV+<br>HIV- | Body composition | Groups comparison           | Anthropometric: body mass, height, BMI;<br>DXA: body fat mass, lean mass;                                                            | Not applied                                                                                             | NI | NI          |

|    |      |                |              |                                                 |                   |                                                                                                                                                                                                                          |                                                      |    |                          |             |
|----|------|----------------|--------------|-------------------------------------------------|-------------------|--------------------------------------------------------------------------------------------------------------------------------------------------------------------------------------------------------------------------|------------------------------------------------------|----|--------------------------|-------------|
|    |      |                |              |                                                 |                   | Magnetic Resonance Imaging: visceral fat                                                                                                                                                                                 |                                                      |    |                          |             |
| 58 | 2006 | Barros         | HIV+         | Body composition<br>Muscular strength/endurance | Associations      | Anthropometric: body mass, height, Biceps SF, Suprailiac SF, Subscapular SF; Triceps SF; Axilla SF, Calf SF, calf circumference, arm contract circumference; Muscular strength/endurance: vertical jump, horizontal jump | Previous study (sample HIV-)                         | NI |                          | NI          |
| 59 | 2006 | Ergun-Longmire | HIV+         | Body composition                                | Groups comparison | Anthropometric: body mass, height, BMI, Triceps SF, Biceps SF, Abdominal SF, waist circumference, hip circumference                                                                                                      | Z-scores                                             |    | NI                       | NI          |
| 60 | 2006 | Gafni          | HIV+         | Body composition                                | Associations      | Anthropometric: body mass, height, BMI; DXA: bone mass density                                                                                                                                                           | Growth curves (NCHS/WHO)                             | NI |                          | NI          |
| 61 | 2006 | Gutiérrez      | HIV+         | Body composition                                | Associations      | Anthropometric: body mass, height, BMI, Triceps SF, Subscapular SF                                                                                                                                                       | Spanish Growth curves                                | NI |                          | NI          |
| 62 | 2006 | Haroun         | HIV+<br>HIV- | Body composition                                | Groups comparison | Anthropometric: body mass, height, BMI, Triceps SF, Subscapular SF, waist circumference                                                                                                                                  | British Growth curves                                | NI |                          | NI          |
| 63 | 2006 | Hartman        | HIV+         | Body composition                                | Groups comparison | Anthropometric: body mass, height, BMI, Biceps SF, Triceps SF, Subscapular SF, Suprailiac SF, arm relaxed circumference, calf circumference; waist circumference, hip circumference                                      | Dutch Growth curves                                  | NI |                          | NI          |
| 64 | 2006 | Moscocki       | HIV+<br>HIV- | Body composition                                | Groups comparison | Anthropometric: body mass, height, BMI, Biceps SF, Triceps SF, Subscapular SF, Suprailiac SF, arm relaxed circumference, arm muscular circumference                                                                      | NHANES III                                           |    | NI                       | NI          |
| 65 | 2006 | Verkauskiene   | HIV+         | Body composition                                | Groups comparison | Anthropometric: body mass, height, BMI, Biceps SF, Triceps SF, Subscapular SF, Suprailiac SF; BIA: body fat percentage                                                                                                   | French Growth curves                                 | NI |                          | NI          |
| 66 | 2006 | Weidle         | HIV+         | Body composition                                | Associations      | Anthropometric: body mass, height                                                                                                                                                                                        | Not applied                                          |    | NI                       | NI          |
| 67 | 2007 | Chantry        | HIV+<br>HIV- | Body composition                                | Groups comparison | Anthropometric: body mass, height, BMI                                                                                                                                                                                   | Growth curves (NCHS/WHO)                             | NI |                          | NI          |
| 68 | 2007 | Dzwonek        | HIV+         | Body composition                                | Associations      | Anthropometric: body mass, height, BMI, Triceps SF, Biceps SF, Subscapular SF, Suprailiac SF, arm relaxed circumference, waist circumference, hip circumference, calf circumference                                      | (BMI) British Growth curves (SF) Dutch Growth curves | NI |                          | NI          |
| 69 | 2007 | Ene            | HIV+         | Body composition                                | Groups comparison | Anthropometric: body mass, height, arm relaxed circumference, hip circumference, abdominal girth                                                                                                                         | Not applied                                          |    | Structured questionnaire | Not applied |
| 70 | 2007 | Kim            | HIV+         | Body composition                                | Groups comparison | Anthropometric: body mass, height, BMI                                                                                                                                                                                   | Growth curves (NCHS/WHO)                             | NI |                          | NI          |
| 71 | 2007 | McComsey       | HIV+<br>HIV- | Body composition                                | Groups comparison | Anthropometric: body mass, height, waist circumference, hip circumference, waist-to-height ration                                                                                                                        | Not applied                                          |    | NI                       | NI          |
| 72 | 2007 | Mora           | HIV+         | Body composition                                | Groups comparison | Anthropometric: body mass, height, BMI;                                                                                                                                                                                  | Italian Growth                                       | NI |                          | NI          |

|    |      |               |              |                  |                             |                                                                                                                                                                             |                                                                                                                           |                          |               |
|----|------|---------------|--------------|------------------|-----------------------------|-----------------------------------------------------------------------------------------------------------------------------------------------------------------------------|---------------------------------------------------------------------------------------------------------------------------|--------------------------|---------------|
|    |      |               | HIV-         |                  |                             | DXA: bone mass density                                                                                                                                                      | curves                                                                                                                    |                          |               |
| 73 | 2007 | Papaevangelou | HIV+<br>HIV- | Body composition | Groups comparison           | Anthropometric: body mass, height, BMI                                                                                                                                      | Not applied                                                                                                               | NI                       | NI            |
| 74 | 2007 | Tremechin     | HIV+<br>HIV- | Body composition | Groups comparison           | Anthropometric: body mass, height, BMI, arm relaxed circumference, Triceps SF, Subscapular SF; BIA: fat-free mass, total body water                                         | Growth curves (NCHS/WHO)                                                                                                  | NI                       | NI            |
| 75 | 2007 | Vigano        | HIV+<br>HIV- | Body composition | Changes in Body composition | Anthropometric: body mass, height, BMI; DXA: body fat mass, lean mass                                                                                                       | Not applied                                                                                                               | NI                       | NI            |
| 76 | 2007 | Vigano        | HIV+<br>HIV- | Body composition | Changes in Body composition | Anthropometric: body mass, height, BMI; DXA: lean mass                                                                                                                      | Not applied                                                                                                               | NI                       | NI            |
| 77 | 2008 | Chantry       | HIV+<br>HIV- | Body composition | Groups comparison           | Anthropometric: body mass, height, BMI, waist circumference, hip circumference, arm relaxed circumference, arm muscular circumference, Triceps SF, Thigh SF, Subscapular SF | NHANES 99-00 e 01-02                                                                                                      | NI                       | NI            |
| 78 | 2008 | Gonzales-Tome | HIV+         | Body composition | Changes in Body composition | Anthropometric: body mass, height, arm relaxed circumference, Triceps SF, Subscapular SF; DXA: bone mass density, lean mass, body fat percentage                            | (bone mass density) Previous study (sample HIV-) (bone mass density) World Health Organization Taskforce for Osteoporosis | NI                       | NI            |
| 79 | 2008 | Miller        | HIV+<br>HIV- | Body composition | Groups comparison           | Anthropometric: body mass, height, BMI, waist circumference, hip circumference, arm relaxed circumference, Triceps SF, arm muscular circumference                           | NHANES III                                                                                                                | NI                       | NI            |
| 80 | 2008 | Purdy         | HIV+         | Body composition | Changes in Body composition | Anthropometric: body mass, height; DXA: bone mass density                                                                                                                   | Previous study (sample HIV-)                                                                                              | NI                       | NI            |
| 81 | 2008 | Sharma        | HIV+         | Body composition | Changes in Body composition | Anthropometric: body mass, height, BMI, arm relaxed circumference, Triceps SF, arm muscular circumference                                                                   | Growth curves (NCHS/WHO) (arm muscular circumference Triceps SF) Previous study (sample HIV-)                             | NI                       | NI            |
| 82 | 2008 | Spagnoulo     | HIV+<br>HIV- | Body composition | Groups comparison           | Anthropometric: body mass, height, BMI; Ultrasound: visceral fat                                                                                                            | Italian Growth curves                                                                                                     | NI                       | NI            |
| 83 | 2009 | Aldrovandi    | HIV+<br>HIV- | Body composition | Groups comparison           | Anthropometric: body mass, height, BMI, waist circumference, hip circumference, waist-to-height ration; DXA: lean mass, body fat mass                                       | Growth curves (NCHS/WHO)                                                                                                  | Structured questionnaire | Days per week |
| 84 | 2009 | Arpadi        | HIV+<br>HIV- | Body composition | Groups comparison           | Anthropometric: body mass, height, BMI; DXA: body fat mass, body fat percentage                                                                                             | Growth curves (NCHS/WHO)                                                                                                  | NI                       | NI            |
| 85 | 2009 | Lopez         | HIV+         | Body composition | Groups comparison           | Anthropometric: body mass, height, BMI;                                                                                                                                     | Z-scores                                                                                                                  | NI                       | NI            |

|    |      |          |              |                                                                                             |                                                                                                      |                                                                                                                                                                                                                                                                                          |                                                                      |                          |    |    |    |
|----|------|----------|--------------|---------------------------------------------------------------------------------------------|------------------------------------------------------------------------------------------------------|------------------------------------------------------------------------------------------------------------------------------------------------------------------------------------------------------------------------------------------------------------------------------------------|----------------------------------------------------------------------|--------------------------|----|----|----|
|    |      |          | HIV-         |                                                                                             |                                                                                                      | DXA: bone mass density, body fat mass                                                                                                                                                                                                                                                    |                                                                      |                          |    |    |    |
| 86 | 2009 | Mora     | HIV+         | Body composition                                                                            | Method validity                                                                                      | Anthropometric: body mass, height, BMI;<br>DXA: bone mass density, bone mass content;<br>Ultrasound: speed of sound                                                                                                                                                                      | (bone mass density, bone mass content)<br>NHANES III                 | NI                       |    | NI |    |
| 87 | 2009 | Sarni    | HIV+         | Body composition                                                                            | Associations                                                                                         | Anthropometric: body mass, height, BMI                                                                                                                                                                                                                                                   | Growth curves (NCHS/WHO)                                             | NI                       |    | NI |    |
| 88 | 2009 | Vigano   | HIV+         | Body composition                                                                            | Changes in Body composition                                                                          | Anthropometric: body mass, height, BMI                                                                                                                                                                                                                                                   | Growth curves (NCHS/WHO)                                             | NI                       |    | NI |    |
| 89 | 2010 | Cervia   | HIV+         | Body composition                                                                            | Changes in Body composition                                                                          | Anthropometric: body mass, height, waist circumference, hip circumference, Triceps SF, Thigh SF, Subscapular SF;<br>BIA: total body water, fat-free mass, body fat mass                                                                                                                  | NHANES (NR)                                                          | NI                       |    | NI |    |
| 90 | 2010 | Chantry  | HIV+         | Body composition                                                                            | Changes in Body composition                                                                          | Anthropometric: body mass, height, waist circumference, hip circumference, Triceps SF, Thigh SF, Subscapular SF, arm muscular circumference, tight muscular circumference;<br>BIA: total body water, fat-free mass, body fat mass                                                        | NHANES 99-00 e 01-02                                                 | NI                       |    | NI |    |
| 91 | 2010 | Jacobson | HIV+<br>HIV- | Body composition                                                                            | Groups comparison                                                                                    | Anthropometric: body mass, height, BMI;<br>DXA: bone mass content, bone mass density, lean mass, body fat mass                                                                                                                                                                           | Growth curves (NCHS/WHO)                                             | Structured questionnaire |    | NR |    |
| 92 | 2010 | Miller   | HIV+<br>HIV- | Body composition                                                                            | Groups comparison                                                                                    | Anthropometric: body mass, height, BMI, hip circumference, waist circumference;<br>DXA: body fat mass, body fat percentage, lean mass                                                                                                                                                    | Growth curves (NCHS/WHO)                                             | NI                       |    | NI |    |
| 93 | 2010 | Miller   | HIV+         | Cardiorespiratory fitness<br>Muscular strength/endurance<br>Body composition<br>Flexibility | Changes in: Body composition, Cardiorespiratory fitness, Muscular strength/endurance and Flexibility | Muscular strength/endurance: hand grip strength, sit-up;<br>Flexibility: sit-to-reach;<br>Maximum effort treadmill test: peak oxygen consumption, heart rate, respiratory rate;<br>Anthropometric: body mass, height, BMI, hip circumference, waist circumference;<br>DXA: body fat mass | Growth curves (NCHS/WHO)                                             | NI                       |    | NI |    |
| 94 | 2010 | Stagi    | HIV+         | Body composition                                                                            | Changes in Body composition                                                                          | Anthropometric: body mass, height, BMI                                                                                                                                                                                                                                                   | Italian curves                                                       | Growth                   | NI |    | NI |
| 95 | 2010 | Vigano   | HIV+         | Body composition                                                                            | Changes in Body composition                                                                          | Anthropometric: body mass, height, BMI;<br>DXA: bone mass density                                                                                                                                                                                                                        | Italian curves                                                       | Growth                   | NI |    | NI |
| 96 | 2010 | Werner   | HIV+         | Body composition                                                                            | Associations                                                                                         | Anthropometric: body mass, height, BMI, Triceps SF, Subscapular SF                                                                                                                                                                                                                       | Growth curves (NCHS/WHO)                                             | NR                       |    | NR |    |
| 97 | 2010 | Zuccotti | HIV+<br>HIV- | Body composition                                                                            | Groups comparison                                                                                    | Anthropometric: body mass, height, BMI;<br>DXA: bone mass content, bone mass density                                                                                                                                                                                                     | Italian curves (bone mass density, bone mass content)<br>NHANES (NR) | Growth                   | NI |    | NI |

|     |      |            |              |                  |                             |                                                                                                                                                                                              |                                                             |    |    |
|-----|------|------------|--------------|------------------|-----------------------------|----------------------------------------------------------------------------------------------------------------------------------------------------------------------------------------------|-------------------------------------------------------------|----|----|
| 98  | 2011 | Contri     | HIV+         | Body composition | Groups comparison           | Anthropometric: body mass, height, BMI, waist circumference, arm relaxed circumference<br>Triceps SF, Subscapular SF;<br>BIA: fat-free mass, total body water                                | Growth curves (NCHS/WHO) (NR)                               | NI | NI |
| 99  | 2011 | da Silva   | HIV+         | Body composition | Associations                | Anthropometric: body mass, height, BMI                                                                                                                                                       | Growth curves (NCHS/WHO)                                    | NI | NI |
| 100 | 2011 | Dimock     | HIV+         | Body composition | Associations                | Anthropometric: body mass, height, BMI, waist circumference, hip circumference;<br>DXA: body fat mass, lean mass                                                                             | Not applied                                                 | NI | NI |
| 101 | 2011 | Geffner    | HIV+         | Body composition | Associations                | Anthropometric: body mass, height, BMI, waist circumference; hip circumference, waist-to-height ratio;<br>DXA: body fat percentage                                                           | BMI Percentiles                                             | NI | NI |
| 102 | 2011 | Jacobson   | HIV+<br>HIV- | Body composition | Groups comparison           | Anthropometric: body mass, height, BMI, Suprailiac SF, waist circumference, hip circumference, waist-to-hip ratio;<br>DXA: body fat mass, lean mass, body fat percentage                     | Growth curves (NCHS/WHO) (body fat mass)<br>NHANES 199-2004 | NI | NI |
| 103 | 2011 | Mohd       | HIV+         | Body composition | Associations                | Anthropometric: body mass, height, BMI                                                                                                                                                       | Growth curves (NCHS/WHO)                                    | NI | NI |
| 104 | 2011 | Morén      | HIV+<br>HIV- | Body composition | Groups comparison           | Physical examination: visual inspection of fat distribution                                                                                                                                  | Not applied                                                 | NI | NI |
| 105 | 2011 | Ramalho    | HIV+<br>HIV- | Body composition | Groups comparison           | Anthropometric: body mass, height, BMI, waist circumference hip circumference, Triceps SF, Subscapular SF, SF ratio (Subscapular SF/Triceps SF)                                              | Growth curves (NCHS/WHO)                                    | NI | NI |
| 106 | 2011 | Resino     | HIV+         | Body composition | Changes in Body composition | Anthropometric: body mass, height, BMI                                                                                                                                                       | Growth curves (NCHS/WHO)                                    | NI | NI |
| 107 | 2011 | Spoulou    | HIV+<br>HIV- | Body composition | Groups comparison           | Anthropometric: body mass, height, BMI;<br>DXA: body fat mass, lean mass                                                                                                                     | Z-scores                                                    | NI | NI |
| 108 | 2011 | Tremeschin | HIV+<br>HIV- | Body composition | Groups comparison           | Anthropometric: body mass, height, BMI, arm relaxed circumference, waist circumference, Subscapular SF, Triceps SF;<br>BIA: fat-free mass total body water;<br>DXA: body fat mass, lean mass | Growth curves (NCHS/WHO)                                    | NI | NI |
| 109 | 2011 | Vigano     | HIV+<br>HIV- | Body composition | Groups comparison           | Anthropometric: body mass, height, BMI;<br>DXA: body fat mass, lean mass                                                                                                                     | Italian Growth curves                                       | NI | NI |
| 110 | 2012 | Alam       | HIV+         | Body composition | Associations                | Physical examination: visual inspection of fat distribution                                                                                                                                  | Not applied                                                 | NI | NI |
| 111 | 2012 | Arpadi     | HIV+         | Body composition | Groups comparison           | Anthropometric: body mass, height, BMI;<br>DXA: bone mass content, bone mass density;                                                                                                        | Percentiles                                                 | NI | NI |
| 112 | 2012 | Bhargav    | HIV+         | Body composition | Associations                | Anthropometric: body mass, height, BMI;<br>BIA: body fat mass, body fat percentage, fat-free mass                                                                                            | Not applied                                                 | NI | NI |
| 113 | 2012 | Innes      | HIV+         | Body composition | Groups comparison           | Anthropometric: body mass, height, BMI, arm relaxed circumference, thigh circumference, chest circumference, waist circumference; hip                                                        | Z-scores                                                    | NI | NI |

|     |      |                 |           |                                                 |                             |                                                                                                                                                                                                                                                  |                                                                           |                          |             |
|-----|------|-----------------|-----------|-------------------------------------------------|-----------------------------|--------------------------------------------------------------------------------------------------------------------------------------------------------------------------------------------------------------------------------------------------|---------------------------------------------------------------------------|--------------------------|-------------|
|     |      |                 |           |                                                 |                             | circumference, Biceps SF, Triceps SF, Subscapular SF, Thigh SF, waist-to-height ratio, SF ratio;<br>DXA: body fat mass, body fat percentage, lean mass                                                                                           |                                                                           |                          |             |
| 114 | 2012 | Lindsey         | HIV+ HIV- | Body composition                                | Groups comparison           | DXA: lean mass, body fat mass, body fat percentage                                                                                                                                                                                               | Not applied                                                               | NI                       | NI          |
| 115 | 2012 | Miller          | HIV+ HIV- | Body composition                                | Groups comparison           | Anthropometric: body mass, height, BMI, waist circumference, hip circumference; DXA: body fat percentage                                                                                                                                         | Growth curves (NCHS/WHO)                                                  | NI                       | NI          |
| 116 | 2012 | Negra           | HIV+      | Body composition                                | Changes in Body composition | DXA: bone mass density                                                                                                                                                                                                                           | Not applied                                                               | NI                       | NI          |
| 117 | 2012 | Puthanakit      | HIV+ HIV- | Body composition                                | Groups comparison           | Anthropometric: body mass, height, BMI; DXA: bone mass density                                                                                                                                                                                   | Growth curves (NCHS/WHO) (body mass, height) Thai reference values        | NI                       | NI          |
| 118 | 2012 | Ramos           | HIV+ HIV- | Body composition<br>Muscular strength/endurance | Groups comparison           | Anthropometric: body mass, height, BMI; Muscular strength/endurance: isokinetic dynamometer                                                                                                                                                      | Not applied                                                               | NI                       | NI          |
| 119 | 2012 | Schtscherbyna   | HIV+      | Body composition                                | Associations                | Anthropometric: body mass, height, BMI; DXA: bone mass density, lean mass, body fat percentage                                                                                                                                                   | Growth curves (NCHS/WHO)                                                  | NI                       | NI          |
| 120 | 2013 | Arpadi          | HIV+      | Body composition                                | Groups comparison           | Anthropometric: body mass, height, BMI, arm relaxed circumference, thigh circumference, waist circumference, hip circumference, Biceps SF, Triceps SF, Subscapular SF, Suprailiac SF, Abdominal SF, Thigh SF, SF ratio; BIA: body fat percentage | Growth curves (NCHS/WHO)                                                  | NI                       | NI          |
| 121 | 2013 | Bunders         | HIV+      | Body composition                                | Associations                | Anthropometric: body mass, height, BMI; DXA: bone mass density                                                                                                                                                                                   | Growth curves (NCHS/WHO)                                                  | NI                       | NI          |
| 122 | 2013 | Chokephaibulkit | HIV+      | Body composition                                | Associations                | DXA: bone mass density                                                                                                                                                                                                                           | Not applied                                                               | NI                       | NI          |
| 123 | 2013 | DiMeglio        | HIV+ HIV- | Body composition                                | Groups comparison           | Anthropometric: body mass, height, BMI; DXA: bone mass density                                                                                                                                                                                   | Growth curves (NCHS/WHO) (bone mass density) Previous study (sample HIV-) | Structured questionnaire | Percentiles |
| 124 | 2013 | dos Santos      | HIV+      | Flexibility; Muscular strength/endurance        | Associations                | Flexibility: teste de sit-to-reach; Muscular strength/endurance: abdominal test                                                                                                                                                                  | PROESP-BR                                                                 | NI                       | NI          |
| 125 | 2013 | Fabiano         | HIV+      | Body composition                                | Changes in Body composition | Anthropometric: body mass, height, BMI, waist circumference; DXA: lean mass, body fat mass, bone mass content                                                                                                                                    | Italian Growth curves (Waist circumference)                               | NI                       | NI          |

|     |      |            |              |                                                                                             |                             |                                                                                                                                                                                                                                                                                                                                            | Previous study<br>(sample HIV-)                                           |                          |                                 |
|-----|------|------------|--------------|---------------------------------------------------------------------------------------------|-----------------------------|--------------------------------------------------------------------------------------------------------------------------------------------------------------------------------------------------------------------------------------------------------------------------------------------------------------------------------------------|---------------------------------------------------------------------------|--------------------------|---------------------------------|
| 126 | 2013 | Innes      | HIV+         | Body composition                                                                            | Method validity             | Anthropometric: body mass, height, BMI, arm relaxed circumference, thigh circumference, chest circumference, waist circumference, hip circumference, Biceps SF, Triceps SF, Suprailiac SF, Subscapular SF, Thigh SF, waist-to-height ration, SF ratio, waist-to-arm relaxed circumference ratio, body mass/arm relaxed circumference ratio | New cut-point                                                             | NI                       | NI                              |
| 127 | 2013 | Lima       | HIV+         | Body composition                                                                            | Associations                | Anthropometric: body mass, height, BMI; DXA: bone mass density, bone mass content                                                                                                                                                                                                                                                          | Growth curves (NCHS/WHO) (bone mass content, bone mass density) NHANES IV | Pedometer                | 13,000 and 11,000 steps per day |
| 128 | 2013 | Macdonald  | HIV+         | Body composition                                                                            | Associations                | Anthropometric: body mass, height, BMI, tibia length; DXA: bone mass content, lean mass, body fat percentage                                                                                                                                                                                                                               | Not applied                                                               | Structured questionnaire | NR                              |
| 129 | 2013 | Palchetti  | HIV+         | Body composition                                                                            | Associations                | Anthropometric: body mass, height, BMI, waist circumference, arm relaxed circumference, calf circumference, Triceps SF, Biceps SF, Subscapular SF, Suprailiac SF, SF ratio; DXA: lean mass, body fat mass, body fat percentage                                                                                                             | Growth curves (NCHS/WHO)                                                  | NI                       | NI                              |
| 130 | 2013 | Palchetti  | HIV+         | Body composition                                                                            | Method validity             | Anthropometric: body mass, height, BMI; BIA: fat-free mass, body fat mass DXA: fat-free mass, body fat mass                                                                                                                                                                                                                                | Growth curves (NCHS/WHO)                                                  | NI                       | NI                              |
| 131 | 2013 | Sharma     | HIV+         | Body composition                                                                            | Associations                | Anthropometric: body mass, height, BMI;                                                                                                                                                                                                                                                                                                    | Z-scores                                                                  | NI                       | NI                              |
| 132 | 2013 | Somarriba  | HIV+<br>HIV- | Body composition<br>Cardiorespiratory fitness<br>Muscular strength/endurance<br>Flexibility | Groups comparison           | Anthropometric: body mass, height, BMI, waist circumference, hip circumference, waist-to-height ration; DXA, body fat mass; Maximum effort treadmill test: peak oxygen consumption; Muscular strength/endurance: one repetition maximum test (chest press and leg press), sit-up; Flexibility: modified sit-to-reach test                  | Growth curves (NCHS/WHO) National Presidential Fitness Program            | NI                       | NI                              |
| 133 | 2014 | Agustinho  | HIV+<br>HIV- | Body composition                                                                            | Groups comparison           | Anthropometric: body mass, height, BMI, waist circumference, hip circumference, Subscapular SF, Biceps SF, Triceps SF, Suprailiac SF; BIA: body fat mass                                                                                                                                                                                   | Growth curves (NCHS/WHO)                                                  | NI                       | NI                              |
| 134 | 2014 | Dejkharnon | HIV+         | Body composition                                                                            | Changes in Body composition | Anthropometric: body mass, height, BMI                                                                                                                                                                                                                                                                                                     | Growth curves (NCHS/WHO)                                                  | NI                       | NI                              |
| 135 | 2014 | Foissac    | HIV+         | Body composition                                                                            | Changes in Body             | Anthropometric: body mass, height, BMI                                                                                                                                                                                                                                                                                                     | Not applied                                                               | NI                       | NI                              |



|     |      |             |           |                             | composition                 |                                                                                                                                                                                                          |                                                                                                                                                  |                          |                     |    |
|-----|------|-------------|-----------|-----------------------------|-----------------------------|----------------------------------------------------------------------------------------------------------------------------------------------------------------------------------------------------------|--------------------------------------------------------------------------------------------------------------------------------------------------|--------------------------|---------------------|----|
| 136 | 2014 | Hillesheim  | HIV+      | Body composition            | Associations                | Anthropometric: body mass, height, BMI                                                                                                                                                                   | Growth curves (NCHS/WHO)                                                                                                                         | NI                       | NI                  |    |
| 137 | 2014 | Humphries   | HIV+      | Muscular strength/endurance | Groups comparison           | Anthropometric: body mass, height, BMI; Muscular strength/endurance: hand grip strength                                                                                                                  | NR                                                                                                                                               | NI                       | NI                  |    |
| 138 | 2014 | Mussime     | HIV+ HIV- | Body composition            | Groups comparison           | Anthropometric: body mass, height, arm relaxed circumference, calf circumference, Biceps SF, Triceps SF, Subscapular SF, Suprailiac SF, SF ratio                                                         | Not applied                                                                                                                                      | NI                       | NI                  |    |
| 139 | 2014 | Theodoridou | HIV+ HIV- | Body composition            | Groups comparison           | Anthropometric: body mass, height, BMI; DXA: body fat mass, lean mass                                                                                                                                    | Not applied                                                                                                                                      | NI                       | NI                  |    |
| 140 | 2014 | Vreeman     | HIV+      | Body composition            | Associations                | Anthropometric: body mass, height, arm relaxed circumference; Deuterium dilution: total body water                                                                                                       | Not applied                                                                                                                                      | NI                       | NI                  |    |
| 141 | 2015 | Aurpibul    | HIV+      | Body composition            | Changes in Body composition | Anthropometric: body mass, height; DXA: bone mass density                                                                                                                                                | (bone mass density) Thai reference values                                                                                                        | NI                       | NI                  |    |
| 142 | 2015 | Cohen       | HIV+ HIV- | Body composition            | Groups comparison           | Anthropometric: body mass, height, BMI; DXA: body fat mass                                                                                                                                               | Z-scores                                                                                                                                         | NI                       | NI                  |    |
| 143 | 2015 | Della Negra | HIV+      | Body composition            | Changes in Body composition | Anthropometric: body mass, height; DXA: bone mass density                                                                                                                                                | Growth curves (NCHS/WHO)                                                                                                                         | NI                       | NI                  |    |
| 144 | 2015 | dos Reis    | HIV+      | Body composition            | Associations                | Anthropometric: body mass, height, BMI, arm relaxed circumference, waist circumference, neck circumference, arm muscular circumference, arm fat mass circumference, Triceps SF; BIA: body fat percentage | Growth curves (NCHS/WHO) (waist circumference) NHANES 199-2002, Previous study (sample HIV-)) (neck circumference) Previous study (sample HIV-)) | NI                       | NI                  |    |
| 145 | 2015 | Mora        | HIV+ HIV- | Body composition            | Groups comparison           | Anthropometric: body mass, height, BMI; DXA: bone mass density                                                                                                                                           | Italian Growth curves                                                                                                                            | NI                       | NI                  |    |
| 146 | 2015 | Palchetti   | HIV+      | Body composition            | Changes in Body composition | Anthropometric: body mass, height, BMI; DXA: body fat mass, lean mass, bone mass content, bone mass density                                                                                              | Growth curves (NCHS/WHO)                                                                                                                         | NI                       | NI                  |    |
| 147 | 2015 | Swetha      | HIV+      | Body composition            | Associations                | Anthropometric: body mass, height, BMI, SF (NR)                                                                                                                                                          | Growth curves (NCHS/WHO)                                                                                                                         | NI                       | NI                  |    |
| 148 | 2016 | Arpadi      | HIV+ HIV- | Body composition            | Groups comparison           | Anthropometric: body mass, height, BMI; DXA: bone mass content, bone mass density                                                                                                                        | Growth curves (NCHS/WHO)                                                                                                                         | Structured questionnaire | WHO recommendations | PA |
| 149 | 2016 | Gaur        | HIV+      | Body composition            | Changes in Body composition | Anthropometric: body mass, height; DXA: bone mass density                                                                                                                                                | Growth curves (NCHS/WHO)                                                                                                                         | NI                       | NI                  |    |
| 150 | 2016 | de Lima     | HIV+      | Body composition            | Method validity             | Anthropometric: body mass, height, BMI, arm relaxed circumference, humerus diameter,                                                                                                                     | Growth curves (NCHS/WHO)                                                                                                                         | NI                       | NI                  |    |

|     |      |             |              |                                                                                                |                                                                                                      |                                                                                                                                                                                                                                                                                                          |                                                                        |                          |                     |    |
|-----|------|-------------|--------------|------------------------------------------------------------------------------------------------|------------------------------------------------------------------------------------------------------|----------------------------------------------------------------------------------------------------------------------------------------------------------------------------------------------------------------------------------------------------------------------------------------------------------|------------------------------------------------------------------------|--------------------------|---------------------|----|
|     |      |             |              |                                                                                                |                                                                                                      | femur diameter, Triceps SF, arm muscular circumference;<br>DXA: bone mass content, bone mass density                                                                                                                                                                                                     |                                                                        |                          |                     |    |
| 151 | 2016 | Sonogo      | HIV+         | Body composition                                                                               | Associations                                                                                         | Anthropometric: body mass, height, BMI                                                                                                                                                                                                                                                                   | Growth curves (NCHS/WHO)                                               | Structured questionnaire | Days per week       |    |
| 152 | 2016 | Sudjaritruk | HIV+         | Body composition                                                                               | Associations                                                                                         | Anthropometric: body mass, height, BMI;<br>DXA: bone mass density                                                                                                                                                                                                                                        | Growth curves (NCHS/WHO);<br>(body mass, height) Thai reference values | Structured questionnaire | Not applied         |    |
| 153 | 2016 | Wong        | HIV+<br>HIV- | Body composition                                                                               | Groups comparison                                                                                    | Anthropometric: body mass, height, arm relaxed circumference;<br>BIA: fat-free mass percentual                                                                                                                                                                                                           | Growth curves (NCHS/WHO)                                               | Structured questionnaire | WHO recommendations | PA |
| 154 | 2017 | Carmo       | HIV+         | Body composition                                                                               | Changes in Body composition                                                                          | Anthropometric: body mass, height;<br>DXA: bone mass density                                                                                                                                                                                                                                             | International Society for Clinical Densitometry                        | NR                       | Not applied         |    |
| 155 | 2017 | de Lima     | HIV+<br>HIV- | Body composition<br>Cardiorespiratory fitness                                                  | Groups comparison                                                                                    | Anthropometric: body mass, height, BMI;<br>Maximum effort cycle ergometer test : peak oxygen consumption, heart rate                                                                                                                                                                                     | Growth curves (NCHS/WHO)                                               | Accelerometer            | WHO recommendations | PA |
| 156 | 2017 | Giacomet    | HIV+<br>HIV- | Body composition                                                                               | Groups comparison                                                                                    | Anthropometric: body mass, height, BMI;<br>DXA: bone mass density                                                                                                                                                                                                                                        | Italian Growth curves                                                  | NI                       | NI                  |    |
| 157 | 2017 | Jacobson    | HIV+<br>HIV- | Body composition                                                                               | Groups comparison                                                                                    | Anthropometric: body mass, height, BMI;<br>DXA: bone mass density, bone mass content                                                                                                                                                                                                                     | Growth curves (NCHS/WHO)                                               | Structured questionnaire | Internal (Z-scores) |    |
| 158 | 2017 | Jiménez     | HIV+         | Body composition                                                                               | Associations                                                                                         | Anthropometric: body mass, height, BMI;<br>DXA: bone mass density                                                                                                                                                                                                                                        | Spanish Growth curves (bone mass density) Spanish reference values     | NI                       | NI                  |    |
| 159 | 2017 | de Lima     | HIV+         | Body composition                                                                               | Method validity                                                                                      | Anthropometric: body mass, height, BMI, arm relaxed circumference, waist circumference, Subscapular SF, Triceps SF, Abdominal SF, Calf SF, SF ratio;<br>DXA: body fat percentage                                                                                                                         | Growth curves (NCHS/WHO)<br>(body fat percentage) NHANES 2009          | NI                       | NI                  |    |
| 160 | 2017 | de Lima     | HIV+         | Body composition;<br>Muscular strength/endurance;<br>Cardiorespiratory fitness;<br>Flexibility | Changes in: Body composition, Muscular strength/endurance, Cardiorespiratory fitness and Flexibility | Anthropometric: body mass, height, BMI, Triceps SF, Subscapular SF, Biceps SF, Suprailiac SF, SF ratio, abdominal girth, arm muscular circumference;<br>abdominal test, teste de isometria na barra;<br>Submaximal effort treadmill test: peak oxygen consumption;<br>Flexibility: teste de sit-to-reach | Not applied                                                            | NI                       | NI                  |    |
| 161 | 2017 | MacDonald   | HIV+<br>HIV- | Body composition;<br>Muscular strength/endurance                                               | Groups comparison                                                                                    | Anthropometric: body mass, height, BMI;<br>DXA: lean mass, body fat percentage;<br>Computed Tomography: muscle cross-sectional area;<br>Muscular strength/endurance: vertical jump                                                                                                                       | Z-scores                                                               | Structured questionnaire | Not applied         |    |
| 162 | 2017 | Martins     | HIV+         | Body composition                                                                               | Groups comparison                                                                                    | Anthropometric: body mass, height, BMI, arm                                                                                                                                                                                                                                                              | Not applied                                                            | Structured               | PAQ-C score         |    |

|     |      |             |              |                  |                                |                                                                                                                                                                                                                                                                                                                             |                                                                                   |                             |             |
|-----|------|-------------|--------------|------------------|--------------------------------|-----------------------------------------------------------------------------------------------------------------------------------------------------------------------------------------------------------------------------------------------------------------------------------------------------------------------------|-----------------------------------------------------------------------------------|-----------------------------|-------------|
|     |      |             | HIV-         |                  |                                | relaxed circumference, waist circumference;<br>Subscapular SF, Triceps SF, Abdominal SF,<br>Calf SF, SF ratio;<br>DXA: lean mass, body fat percentage;                                                                                                                                                                      |                                                                                   | questionnaire               |             |
| 163 | 2017 | Risti       | HIV+         | Body composition | Associations                   | X-ray: mandibular bone density                                                                                                                                                                                                                                                                                              | Not applied                                                                       | NI                          | NI          |
| 164 | 2017 | Sudjaritruk | HIV+         | Body composition | Associations                   | Anthropometric: body mass, height, BMI;<br>DXA: bone mass density                                                                                                                                                                                                                                                           | Growth curves<br>(NCHS/WHO)<br>(body mass,<br>height)<br>Thai reference<br>values | Structured<br>questionnaire | Not applied |
| 165 | 2017 | Sudjaritruk | HIV+         | Body composition | Associations                   | Anthropometric: body mass, height, BMI;<br>DXA: bone mass density                                                                                                                                                                                                                                                           | Growth curves<br>(NCHS/WHO)<br>(body mass,<br>height)<br>Thai reference<br>values | Structured<br>questionnaire | Not applied |
| 166 | 2017 | Ziegler     | HIV+<br>HIV- | Body composition | Groups comparison              | Anthropometric: body mass, height, BMI, waist<br>circumference                                                                                                                                                                                                                                                              | Not applied                                                                       | NI                          | NI          |
| 167 | 2018 | Archary     | HIV+         | Body composition | Associations                   | Anthropometric: body mass, height, BMI, arm<br>relaxed circumference; Fat-free mass (NR)                                                                                                                                                                                                                                    | Not applied                                                                       | NI                          | NI          |
| 168 | 2018 | Cames       | HIV+         | Body composition | Associations                   | Anthropometric: body mass, height, BMI                                                                                                                                                                                                                                                                                      | Growth curves<br>(NCHS/WHO)                                                       | NI                          | NI          |
| 169 | 2018 | de Castro   | HIV+         | Body composition | Method validity                | Anthropometric: body mass, height, BMI;<br>BIA: body fat mass, body fat percentage, fat-<br>free mass, lean mass, bone mass content;<br>DXA: body fat mass, body fat percentage, fat-<br>free mass, lean mass, bone mass content;<br>Air displacement plethysmography: body fat<br>mass, body fat percentage, fat-free mass | Not applied                                                                       | NI                          | NI          |
| 170 | 2018 | de Lima     | HIV+<br>HIV- | Body composition | Groups comparison              | Anthropometric: body mass, height, BMI,<br>Triceps SF, Subscapular SF, Abdominal SF,<br>Calf SF, arm relaxed circumference, waist<br>circumference                                                                                                                                                                          | Not applied                                                                       | NI                          | NI          |
| 171 | 2018 | de Lima     | HIV+<br>HIV- | Body composition | Groups comparison              | Anthropometric: body mass, height, BMI;<br>DXA: body fat mass                                                                                                                                                                                                                                                               | Not applied                                                                       | NI                          | NI          |
| 172 | 2018 | Innes       | HIV+         | Body composition | Changes in Body<br>composition | Anthropometric: body mass, height, BMI;<br>Fat-free mass (NR)                                                                                                                                                                                                                                                               | Not applied                                                                       | NI                          | NI          |
| 173 | 2018 | Jacobson    | HIV+<br>HIV- | Body composition | Groups comparison              | Anthropometric: body mass, height;<br>DXA: bone mass density, bone mass content,<br>body fat mass, lean mass                                                                                                                                                                                                                | Z-scores                                                                          | NR                          | NR          |
| 174 | 2018 | Puthanakit  | HIV+         | Body composition | Associations                   | Anthropometric: body mass, height, BMI<br>DXA: bone mass density                                                                                                                                                                                                                                                            | (body mass,<br>height)<br>Thai reference<br>values                                | NI                          | NI          |

|     |      |              |              |                                               |                   |                                                                                                                                                                                                                                                                           |                                                                                       |                          |                        |
|-----|------|--------------|--------------|-----------------------------------------------|-------------------|---------------------------------------------------------------------------------------------------------------------------------------------------------------------------------------------------------------------------------------------------------------------------|---------------------------------------------------------------------------------------|--------------------------|------------------------|
| 175 | 2018 | Ramteke      | HIV+<br>HIV- | Body composition                              | Groups comparison | Anthropometric: body mass, height, BMI, arm relaxed circumference, hip circumference, waist circumference, waist-to-height ration, Biceps SF, Triceps SF, Subscapular SF, Suprailiac SF, Abdominal SF, Thigh SF, SF ratio, arm muscular circumference                     | Growth curves (NCHS/WHO)                                                              | NI                       | NI                     |
| 176 | 2018 | Rosales      | HIV+         | Body composition                              | Associations      | Anthropometric: body mass, height, BMI, Triceps SF, Subscapular SF, waist circumference, arm relaxed circumference, calf circumference;<br>BIA: body fat mass, fat-free mass                                                                                              | Percentiles                                                                           | NI                       | NI                     |
| 177 | 2018 | Sharma       | HIV+<br>HIV- | Body composition                              | Groups comparison | Anthropometric: body mass, height, BMI, waist circumference, hip circumference, waist-to-height ration;<br>DXA: body fat mass, lean mass, body fat percentage                                                                                                             | Not applied                                                                           | NI                       | NI                     |
| 178 | 2018 | Shiau        | HIV+<br>HIV- | Body composition                              | Groups comparison | Anthropometric: body mass, height, BMI;<br>DXA: bone mass content                                                                                                                                                                                                         | BMI (NR)<br>(bone mass content) United States Bone Mineral Density in Childhood Study | NI                       | NI                     |
| 179 | 2018 | Strehlau     | HIV+         | Body composition                              | Associations      | Anthropometric: body mass, height, arm relaxed circumference, waist circumference, hip circumference, thigh circumference, Biceps SF, Triceps SF, Subscapular SF, Suprailiac SF, Abdominal SF, Thigh SF, SF ratio;<br>DXA: bone mass content;<br>BIA: body fat percentage | Growth curves (NCHS/WHO)                                                              | NI                       | NI                     |
| 180 | 2018 | Torrejón     | HIV+         | Body composition                              | Associations      | Anthropometric: body mass, height, BMI;<br>DXA: bone mass density                                                                                                                                                                                                         | Growth curves (NCHS/WHO)<br>(bone mass density) NHANES III                            | NI                       | NI                     |
| 181 | 2019 | Alves Júnior | HIV+         | Body composition                              | Associations      | Anthropometric: body mass, height, BMI, Abdominal SF, Triceps SF, Subscapular SF, Calf SF, arm relaxed circumference, waist circumference, neck circumference; DXA: body fat mass;<br>Air displacement plethysmography: body fat mass                                     | Not applied                                                                           | Structured questionnaire | PA-C score             |
| 182 | 2019 | Arpadi       | HIV+<br>HIV- | Body composition                              | Groups comparison | Anthropometric: body mass, height;<br>Ultrasound: calcaneus stiffness                                                                                                                                                                                                     | Growth curves (NCHS/WHO)                                                              | NI                       | NI                     |
| 183 | 2019 | de Lima      | HIV+         | Body composition<br>Cardiorespiratory fitness | Associations      | Anthropometric: body mass, height;<br>Maximum effort cycle ergometer test : peak oxygen consumption;                                                                                                                                                                      | (peak oxygen consumption)<br>Previous study                                           | Accelerometer            | WHO PA recommendations |

|     |      |            |              |                                                                              |                   |                                                                                                                                                                                                |                                                                     |                          |                          |    |
|-----|------|------------|--------------|------------------------------------------------------------------------------|-------------------|------------------------------------------------------------------------------------------------------------------------------------------------------------------------------------------------|---------------------------------------------------------------------|--------------------------|--------------------------|----|
|     |      |            |              |                                                                              |                   | DXA: body fat percentage                                                                                                                                                                       | (sample HIV-)                                                       |                          |                          |    |
| 184 | 2019 | de Lima    | HIV+         | Body composition<br>Cardiorespiratory fitness                                | Method validity   | Anthropometric: body mass, height, BMI;<br>Maximum effort cycle ergometer test : peak oxygen consumption                                                                                       | Not applied                                                         | NI                       | NI                       |    |
| 185 | 2019 | Dona       | HIV+         | Body composition                                                             | Associations      | Anthropometric: body mass, height, BMI DXA: bone mass density                                                                                                                                  | (bone density) reference (NR)                                       | mass WHO data            | Structured questionnaire | NR |
| 186 | 2019 | Gregson    | HIV+<br>HIV- | Body composition<br>Muscular strength/endurance                              | Groups comparison | Anthropometric: body mass, height;<br>Muscular strength/endurance: hand grip strength;<br>DXA: bone mass content, bone mass density, lean mass                                                 | Growth curves (NCHS/WHO)                                            | NI                       | NI                       |    |
| 187 | 2019 | Malete     | HIV+<br>HIV- | Body composition                                                             | Groups comparison | Anthropometric: body mass, height, BMI, waist circumference, hip circumference;                                                                                                                | Growth curves (NCHS/WHO)                                            | Structured questionnaire | Not applied              |    |
| 188 | 2019 | Malete     | HIV+<br>HIV- | Body composition<br>Muscular strength/endurance<br>Cardiorespiratory fitness | Groups comparison | Anthropometric: body mass, height, BMI;<br>Muscular strength/endurance: push-ups;<br>Cardiorespiratory fitness:<br>20 meters shuttle run test: total completed laps                            | Not applied                                                         | Structured questionnaire | Not applied              |    |
| 189 | 2019 | Margossian | HIV+<br>HIV- | Body composition                                                             | Groups comparison | Anthropometric: body mass, height, BMI                                                                                                                                                         | Z-scores                                                            | Structured questionnaire | Minutes per day          |    |
| 190 | 2019 | Marsico    | HIV+<br>HIV- | Body composition                                                             | Groups comparison | Anthropometric: body mass, height, BMI                                                                                                                                                         | Percentiles                                                         | NI                       | NI                       |    |
| 191 | 2019 | Martins    | HIV+         | Body composition<br>Muscular strength/endurance<br>Cardiorespiratory fitness | Associations      | Anthropometric: body mass, height, BMI;<br>DXA: body fat mass, lean mass;<br>Muscular strength/endurance: hand grip strength ;<br>Maximum effort cycle ergometer test: peak oxygen consumption | Z-scores                                                            | Accelerometer            | Not applied              |    |
| 192 | 2019 | de Souza   | HIV+<br>HIV- | Body composition<br>Muscular strength/endurance                              | Groups comparison | Anthropometric: body mass, height, BMI, Triceps SF, sub SF, waist circumference, waist-to-height ratio;<br>Muscular strength/endurance: maximum expiratory pressure                            | NR                                                                  | NI                       | NI                       |    |
| 193 | 2020 | Jacobson   | HIV+         | Body composition                                                             | Groups comparison | DXA: bone mass density                                                                                                                                                                         | Z-scores                                                            | NI                       | NI                       |    |
| 194 | 2020 | Jacobson   | HIV+<br>HIV- | Body composition                                                             | Groups comparison | Anthropometric: body mass, height, BMI;<br>DXA: bone mass density                                                                                                                              | (bone mass density) International Society for Clinical Densitometry | NI                       | NI                       |    |
| 195 | 2020 | Mahtab     | HIV+<br>HIV- | Body composition                                                             | Groups comparison | Anthropometric: body mass, height, BMI, arm relaxed circumference, waist circumference, thigh circumference;                                                                                   | Growth curves (NCHS/WHO)                                            | NI                       | NI                       |    |

|     |      |              |              |                                               |                             |                                                                                                            |                                                                                                                    |        |                          |             |
|-----|------|--------------|--------------|-----------------------------------------------|-----------------------------|------------------------------------------------------------------------------------------------------------|--------------------------------------------------------------------------------------------------------------------|--------|--------------------------|-------------|
|     |      |              |              |                                               |                             | Ultrasound: calcaneus stiffness                                                                            |                                                                                                                    |        |                          |             |
| 196 | 2020 | McHugh       | HIV+         | Body composition<br>Cardiorespiratory fitness | Associations                | Anthropometric: body mass, height, BMI;<br>Cardiorespiratory fitness: incremental walking test             | British curves                                                                                                     | Growth | NI                       | NI          |
| 197 | 2020 | Naidoo       | HIV+         | Body composition<br>Cardiorespiratory fitness | Associations                | Anthropometric: body mass, height, BMI;<br>Cardiorespiratory fitness: six minutes walking test             | Growth curves (NCHS/WHO) (six minutes walking test)<br>Previous study (sample HIV-) e<br>American Thoracic Society |        | NI                       | NI          |
| 198 | 2020 | Shiau        | HIV+         | Body composition                              | Associations                | Anthropometric: body mass, height;<br>DXA: bone mass content                                               | Z-scores                                                                                                           |        | NI                       | NI          |
| 199 | 2020 | Shiau        | HIV+<br>HIV- | Body composition                              | Groups comparison           | Anthropometric: body mass, height, BMI;<br>Computed Tomography: bone mass density                          | Growth curves (NCHS/WHO)                                                                                           |        | NI                       | NI          |
| 200 | 2021 | Alves Júnior | HIV+         | Body composition                              | Associations                | Anthropometric: body mass, height, BMI, Abdominal SF, Triceps SF, Calf SF, SF ratio;<br>DXA: body fat mass | Not applied                                                                                                        |        | Accelerometer            | Not applied |
| 201 | 2021 | Andrade      | HIV+         | Body composition                              | Associations                | Anthropometric: body mass, height, BMI;<br>DXA: bone mass density                                          | Z-scores                                                                                                           |        | NI                       | NI          |
| 202 | 2021 | Bhise        | HIV+         | Body composition                              | Associations                | Anthropometric: body mass, height, BMI;<br>DXA: bone mass density                                          | Indian curves (bone mass density)<br>Previous study (sample HIV-)                                                  | Growth | NI                       | NI          |
| 203 | 2021 | Braithwaite  | HIV+         | Body composition                              | Associations                | Anthropometric: body mass, height, BMI;<br>DXA: bone mass content, bone mass density                       | Growth curves (NCHS/WHO) (bone mass content, bone mass density)<br>NHANESS (NR)                                    |        | NI                       | NI          |
| 204 | 2021 | De Medeiros  | HIV+         | Body composition                              | Associations                | Anthropometric: body mass, height, BMI;<br>DXA: body fat percentage, lean mass, bone mass density          | Not applied                                                                                                        |        | Structured questionnaire | Not applied |
| 205 | 2021 | Dobe         | HIV+         | Body composition                              | Associations                | Anthropometric: body mass, height, BMI, waist circumference, waist-to-height ratio                         | Growth curves (NCHS/WHO)                                                                                           |        | NI                       | NI          |
| 206 | 2021 | Giacomet     | HIV+         | Body composition                              | Associations                | Anthropometric: body mass, height, BMI, Triponderal mass index;<br>DXA: body fat percentage                | Not applied                                                                                                        |        | NI                       | NI          |
| 207 | 2021 | Jacobson     | HIV+<br>HIV- | Body composition                              | Groups comparison           | Anthropometric: body mass, height, BMI;<br>DXA: bone mass content, bone mass density, lean mass            | Not applied                                                                                                        |        | NI                       | NI          |
| 208 | 2021 | Lindsey      | HIV+         | Body composition                              | Changes in Body composition | DXA: bone mass density                                                                                     | Not applied                                                                                                        |        | NI                       | NI          |

|     |      |              |              |                                                                |                   |                                                                                                                                                                                               |                                                                                                                          |                          |                        |
|-----|------|--------------|--------------|----------------------------------------------------------------|-------------------|-----------------------------------------------------------------------------------------------------------------------------------------------------------------------------------------------|--------------------------------------------------------------------------------------------------------------------------|--------------------------|------------------------|
| 209 | 2021 | Martins      | HIV+         | Body composition<br>Muscular strength/endurance                | Associations      | Anthropometric: body mass, height, BMI;<br>DXA: bone mass content, bone mass density, lean mass;<br>Muscular strength/endurance: hand grip strength                                           | Not applied                                                                                                              | Accelerometer            | Not applied            |
| 210 | 2021 | Martins      | HIV+         | Body composition                                               | Associations      | Anthropometric: body mass, height, BMI, Triceps SF, arm relaxed circumference;<br>BIA: body fat mass, lean mass                                                                               | Growth curves (NCHS/WHO) (Triceps SF, arm relaxed circumference)<br>Previous study (sample HIV-)                         | Structured questionnaire | Not applied            |
| 211 | 2021 | Potterton    | HIV+<br>HIV- | Body composition<br>Muscular strength/endurance                | Groups comparison | Anthropometric: body mass, height, BMI;<br>Muscular strength/endurance: hand grip strength                                                                                                    | Growth curves (NCHS/WHO)                                                                                                 | NI                       | NI                     |
| 212 | 2021 | Rukuni       | HIV+<br>HIV- | Body composition                                               | Groups comparison | Anthropometric: body mass, height, BMI;<br>DXA: bone mass content, bone mass density                                                                                                          | (BMI, bone mass density, bone mass content)<br>British Growth curves                                                     | Structured questionnaire | METs per week          |
| 213 | 2021 | Shen         | HIV+<br>HIV- | Body composition                                               | Groups comparison | Anthropometric: body mass, height, BMI;<br>DXA: bone mass content, bone mass density                                                                                                          | Growth curves (NCHS/WHO) (bone mass density, bone mass content)<br>United States Bone Mineral Density in Childhood Study | Structured questionnaire | WHO PA recommendations |
| 214 | 2021 | Su           | HIV+<br>HIV- | Body composition                                               | Groups comparison | Anthropometric: body mass, height, BMI;<br>DXA: body fat mass, body fat percentage                                                                                                            | Growth curves (NCHS/WHO)                                                                                                 | Structured questionnaire | WHO PA recommendations |
| 215 | 2021 | Sudjaritruk  | HIV+         | Body composition                                               | Associations      | Anthropometric: body mass, height;<br>DXA: bone mass density                                                                                                                                  | (body mass, height) Thai reference values<br>(bone mass density) Thai reference values                                   | Structured questionnaire | Not applied            |
| 216 | 2022 | Alves Júnior | HIV+         | Body composition                                               | Associations      | Anthropometric: body mass, height, BMI<br>Abdominal SF, Subscapular SF, Triceps SF, Calf SF, waist circumference, arm relaxed circumference, neck circumference                               | Not applied                                                                                                              | Accelerometer            | Not applied            |
| 217 | 2022 | Chirindza    | HIV+         | Body composition<br>Muscular strength/endurance<br>Flexibility | Associations      | Anthropometric: body mass, height, BMI, Subscapular SF, Triceps SF, arm relaxed circumference, SF ratio;<br>Muscular strength/endurance: abdominal test, hand grip strength, horizontal jump; | Growth curves (NCHS/WHO) (arm relaxed circumference, SF ratios) Previous                                                 | Pedometer                | WHO PA recommendations |

|     |      |                |           |                                                                                             |                   |                                                                                                                                                                                                                                                                   |                                                                                                                 |                          |             |  |
|-----|------|----------------|-----------|---------------------------------------------------------------------------------------------|-------------------|-------------------------------------------------------------------------------------------------------------------------------------------------------------------------------------------------------------------------------------------------------------------|-----------------------------------------------------------------------------------------------------------------|--------------------------|-------------|--|
|     |      |                |           |                                                                                             |                   | Flexibility: sit-to-reach                                                                                                                                                                                                                                         | study (sample HIV-) (Muscular strength/endurance Flexibility) AAPHER Youth Fitness Test, Fitnessgram, Alpha-fit |                          |             |  |
| 218 | 2022 | de Castro      | HIV+      | Body composition                                                                            | Method validity   | Anthropometric: body mass, height, BMI; BIA: bone mass content, fat-free mass, lean mass, body fat mass, total body water; DXA: bone mass content, fat-free mass, lean mass, body fat mass                                                                        | Not applied                                                                                                     | NI                       | NI          |  |
| 219 | 2022 | Dirajlal-Fargo | HIV+      | Body composition                                                                            | Associations      | Anthropometric: body mass, height, BMI; DXA: body fat percentage                                                                                                                                                                                                  | Growth curves (NCHS/WHO)                                                                                        | Structured questionnaire | Not applied |  |
| 220 | 2022 | Mahtab         | HIV+ HIV- | Body composition                                                                            | Groups comparison | Anthropometric: body mass, height, BMI, waist circumference, hip circumference, thigh circumference, arm relaxed circumference                                                                                                                                    | Not applied                                                                                                     | NI                       | NI          |  |
| 221 | 2022 | Martins        | HIV+      | Body composition<br>Muscular strength/endurance                                             | Associations      | Anthropometric: body mass, height; DXA: lean mass; Muscular strength/endurance: hand grip strength                                                                                                                                                                | Not applied                                                                                                     | NI                       | NI          |  |
| 222 | 2022 | Martins        | HIV+      | Body composition<br>Muscular strength/endurance                                             | Associations      | Anthropometric: body mass, height; DXA: lean mass, fat-free mass; Muscular strength/endurance: hand grip strength                                                                                                                                                 | Not applied                                                                                                     | Accelerometer            | Not applied |  |
| 223 | 2022 | Melin          | HIV+ HIV- | Body composition                                                                            | Groups comparison | Anthropometric: height, body mass, BMI, waist circumference, hip circumference, waist to hip ratio                                                                                                                                                                | Growth curves (NCHS/WHO)                                                                                        | Structured questionnaire | Not applied |  |
| 224 | 2022 | Metgud         | HIV+ HIV- | Body composition<br>Cardiorespiratory fitness<br>Muscular strength/endurance<br>Flexibility | Groups comparison | Anthropometric: body mass, height, BMI, waist circumference, hip circumference, waist-to-height ration; Muscular strength/endurance: hand grip strength; Flexibility: modified sit-to-reach test; Cardiorespiratory fitness: six minutes walking test; heart rate | Not applied                                                                                                     | NI                       | NI          |  |
| 225 | 2022 | Potterton      | HIV+ HIV- | Body composition<br>Cardiorespiratory fitness                                               | Groups comparison | Anthropometric: body mass, height, weight-for-age; 6 minutes walking test: total distance, maximum heart rate                                                                                                                                                     | Growth curves (NCHS/WHO)                                                                                        | NI                       | NI          |  |
| 226 | 2022 | Rego           | HIV+      | Body composition<br>Muscular strength/endurance                                             | Associations      | Anthropometric: body mass, height, BMI; Muscular strength/endurance: vertical jump                                                                                                                                                                                | Z-scores                                                                                                        | NI                       | NI          |  |
| 227 | 2022 | Roberts        | HIV+      | Body composition                                                                            | Method validity   | Anthropometric: body mass, height, BMI;                                                                                                                                                                                                                           | Growth curves                                                                                                   | NI                       | NI          |  |



|     |      |                |              |                                                                              |                   |                                                                                                                                                                                                                                                                                                                                                                      |                                                                                                                |                          |                        |
|-----|------|----------------|--------------|------------------------------------------------------------------------------|-------------------|----------------------------------------------------------------------------------------------------------------------------------------------------------------------------------------------------------------------------------------------------------------------------------------------------------------------------------------------------------------------|----------------------------------------------------------------------------------------------------------------|--------------------------|------------------------|
|     |      |                | HIV-         |                                                                              |                   | DXA: bone mass density, bone mass content;<br>Ultrasound: speed of sound, calcaneus stiffness                                                                                                                                                                                                                                                                        | (NCHS/WHO)<br>(bone mass density e bone mass content)<br>United States Bone Mineral Density in Childhood Study |                          |                        |
| 228 | 2022 | Rose           | HIV+<br>HIV- | Body composition                                                             | Groups comparison | Anthropometric: body mass, height, BMI, waist circumference, hip circumference;                                                                                                                                                                                                                                                                                      | Growth curves (NCHS/WHO)                                                                                       | NI                       | NI                     |
| 229 | 2022 | Vargas         | HIV+         | Body composition                                                             | Associations      | Anthropometric: body mass, height;<br>DXA: bone mass density                                                                                                                                                                                                                                                                                                         | Center of Disease Control and Prevention Growth Charts; NHANES III (bone mass density)                         | NI                       | NI                     |
| 230 | 2022 | Zanlorenci     | HIV+         | Body composition<br>Muscular strength/endurance                              | Associations      | Anthropometric: body mass, height, BMI;<br>DXA: bone mass density, bone mass content, body fat percentage;<br>Muscular strength/endurance: hand grip strength                                                                                                                                                                                                        | Z-scores                                                                                                       | Accelerometer            | WHO PA recommendations |
| 231 | 2022 | Zanlorenci     | HIV+         | Body composition                                                             | Associations      | Anthropometric: body mass, height, BMI, Triceps SF, Subscapular SF Abdominal SF, Calf SF;<br>Air displacement plethysmography: body fat mass                                                                                                                                                                                                                         | Growth curves (NCHS/WHO)                                                                                       | Structured questionnaire | WHO PA recommendations |
| 232 | 2023 | Alves-Júnior   | HIV+         | Body composition                                                             | Associations      | Anthropometric: body mass, height, abdominal SF, tricipital SF, subscapular SF, calf SF, body adiposity index, BMI, conicity index, arm relaxed circumference, waist circumference, neck circumference, waist-to-height ratio;<br>DXA: fat mass, fat-free mass, fat mas percentage;<br>Air displacement plethysmography: fat mass, fat-free mass, fat mas percentage | Percentiles                                                                                                    | NI                       | NI                     |
| 233 | 2023 | Alves Júnior   | HIV+         | Body composition                                                             | Associations      | Anthropometric: body mass, height;<br>DXA: body fat mass                                                                                                                                                                                                                                                                                                             | Terciles                                                                                                       | Accelerometer            | Not applied            |
| 234 | 2023 | Comley-White   | HIV+<br>HIV- | Body composition<br>Cardiorespiratory fitness<br>Muscular strength/endurance | Groups comparison | Anthropometric: body mass, height;<br>Cardiorespiratory fitness: Shuttle run test;<br>Muscular strength/endurance: standing broad jump                                                                                                                                                                                                                               | Growth curves (NCHS/WHO)                                                                                       | NI                       | NI                     |
| 235 | 2023 | Davies         | HIV+<br>HIV- | Body composition                                                             | Groups comparison | Anthropometric: height;<br>DXA: fat mass                                                                                                                                                                                                                                                                                                                             | Not applied                                                                                                    | NI                       | NI                     |
| 236 | 2023 | Dirajlal-Fargo | HIV+         | Body composition                                                             | Changes in Body   | Anthropometric: body mass, height, BMI;                                                                                                                                                                                                                                                                                                                              | Growth curves                                                                                                  | NI                       | NI                     |

|     |      |                |              |                                                 | composition       | DXA: fat mass                                                                                                                                                                                                                                                       | (NCHS/WHO)                                                         |                          |                          |               |
|-----|------|----------------|--------------|-------------------------------------------------|-------------------|---------------------------------------------------------------------------------------------------------------------------------------------------------------------------------------------------------------------------------------------------------------------|--------------------------------------------------------------------|--------------------------|--------------------------|---------------|
| 237 | 2023 | Franco-Oliva   | HIV+<br>HIV- | Body composition<br>Muscular strength/endurance | Groups comparison | Anthropometric: body mass, height, waist circumference, hip circumference, thigh circumference, calf circumference, arm relaxed circumference, BMI;<br>BIA: fat-free mass, fat mass, soft lean mass, body water;<br>Muscular strength/endurance: hand grip strength | Growth curves (NCHS/WHO)                                           | Structured questionnaire | WHO PA recommendations   |               |
| 238 | 2023 | Gregson        | HIV+<br>HIV- | Body composition<br>Muscular strength/endurance | Groups comparison | Anthropometric: body mass, height;<br>DXA: fat-free mass, fat mass;<br>Computed Tomography: muscle density;<br>Muscular strength/endurance: hand grip strength, long jump                                                                                           | Not applied                                                        | Structured questionnaire | METs per week            |               |
| 239 | 2023 | Iheme          | HIV+         | Body composition                                | Associations      | Anthropometric: body mass, height, BMI                                                                                                                                                                                                                              | Growth curves (NCHS/WHO)                                           | NI                       | NI                       |               |
| 240 | 2023 | Maina          | HIV+<br>HIV- | Body composition                                | Associations      | Anthropometric: body mass, height, BMI                                                                                                                                                                                                                              | Growth curves (NCHS/WHO)                                           | NI                       | NI                       |               |
| 241 | 2023 | Martins        | HIV+         | Body composition                                | Associations      | Anthropometric: body mass, height, BMI;<br>DXA: lean soft tissue mass, fat mass, bone mass density, bone mineral content                                                                                                                                            | Not applied                                                        | Accelerometer            | Not applied              |               |
| 242 | 2023 | Mukwasi-Kahari | HIV+<br>HIV- | Body composition                                | Groups comparison | Anthropometric: body mass, height, BMI<br>Computed Tomography: bone mass density;<br>DXA: body fat mass, lean mass                                                                                                                                                  | British curves                                                     | Growth                   | Structured questionnaire | METs per week |
| 243 | 2023 | Natukunda      | HIV+         | Body composition                                | Prevalences       | Anthropometric: body mass, height, BMI;<br>DXA: bone mass density                                                                                                                                                                                                   | British curves;<br>International Society for Clinical Densitometry | Growth                   | NI                       | NI            |
| 244 | 2023 | Olibamoyo      | HIV+<br>HIV- | Body composition                                | Groups comparison | Anthropometric: body mass, height, BM                                                                                                                                                                                                                               | Growth curves (NCHS/WHO)                                           | NI                       | NI                       |               |
| 245 | 2023 | Rehman         | HIV+<br>HIV- | Body composition                                | Groups comparison | Anthropometric: body mass, height, BMI;<br>DXA: fat mas, fat-free mass                                                                                                                                                                                              | British curves                                                     | Growth                   | NI                       | NI            |
| 246 | 2023 | Rukuni         | HIV+<br>HIV- | Body composition                                | Groups comparison | Anthropometric: body mass, height;<br>DXA: bone mass density, bone mineral contet                                                                                                                                                                                   | Not applied                                                        | Structured questionnaire | METs per week            |               |

PA: physical activity; HIV or HIV-1: human immunodeficiency virus; HIV+: HIV-diagnosed; HIV-: without HIV infection diagnosis; SF: skinfold; NCHS: National Center for Health Statistics; WHO: World Health Organization; NI: not investigated; BIA: bioelectrical impedance analysis; DXA: dual energy X-ray absorptiometry; NR: not reported; BMI: body mass index; ACSM: American College of Sports Medicine; NHANES: National Health and Nutrition Examination Survey.

**Supplementary Table S3.** Physical activity investigation: methods/protocols, reference values and cut-points, aims and outcomes.

| Protocol/test                                                   | Number of studies<br>(n=50) | % of total studies<br>(n=50) |
|-----------------------------------------------------------------|-----------------------------|------------------------------|
| Structured questionnaires                                       | 33                          | 66.0%                        |
| Accelerometers                                                  | 10                          | 20.0%                        |
| Pedometers                                                      | 2                           | 4.0%                         |
| Not reported                                                    | 5                           | 10.0%                        |
| Reference values and cut-points                                 | Number of studies<br>(n=50) | % of total studies<br>(n=50) |
| WHO physical activity recommendations                           | 10                          | 20.0%                        |
| Internal cut-point                                              | 12                          | 24.0%                        |
| Days per week                                                   | 2                           | 4.0%                         |
| Percentiles                                                     | 1                           | 2.0%                         |
| Steps per day                                                   | 1                           | 2.0%                         |
| Z-score                                                         | 1                           | 2.0%                         |
| Minutes per day                                                 | 1                           | 2.0%                         |
| METs per week                                                   | 4                           | 8.0%                         |
| PAQ-C score                                                     | 2                           | 4.0%                         |
| Not reported                                                    | 6                           | 12.0%                        |
| Not applied                                                     | 22                          | 44.0%                        |
| <b>Aims</b>                                                     |                             |                              |
| Groups comparisons (HIV-diagnosed and HIVV-non diagnosed)       | 21                          |                              |
| Associations with health-related physical fitness               | 12                          |                              |
| Model adjustments                                               | 8                           |                              |
| Sample description                                              | 6                           |                              |
| Match strategy                                                  | 1                           |                              |
| <b>Outcomes</b>                                                 |                             |                              |
| No difference related to physical activity level                | 11                          |                              |
| Low physical activity level to HIV-diagnosed group              | 10                          |                              |
| No association                                                  |                             |                              |
| Body fat parameters                                             | 4                           |                              |
| Bone mass parameters                                            | 2                           |                              |
| Negative association                                            |                             |                              |
| Body fat parameters                                             | 4                           |                              |
| Positive association                                            |                             |                              |
| Bone mass parameters                                            | 2                           |                              |
| Fat-free mass                                                   | 1                           |                              |
| Muscle strength/endurance                                       | 1                           |                              |
| Model adjustments                                               |                             |                              |
| No change in results after adjusted for physical activity level | 8                           |                              |
| Changes in results after adjusted for physical activity level   | 0                           |                              |

%; percentage; WHO: World Health Organization; MET: metabolic equivalent of task; PAQ-C: Physical Activity Questionnaire for Older Children.

**Supplementary Table S4.** References included in the scoping review

|                                                                                                                                                                                                                                                                                                                                       |
|---------------------------------------------------------------------------------------------------------------------------------------------------------------------------------------------------------------------------------------------------------------------------------------------------------------------------------------|
| 1. Miller TL, Awnetwant EL, Evans S <i>et al.</i> (1995) Gastrostomy tube supplementation for HIV-infected children. <i>Pediatrics</i> <b>96</b> , 696-702.                                                                                                                                                                           |
| 2. Saavedra JM, Henderson RA, Perman JA <i>et al.</i> (1995) LONGITUDINAL ASSESSMENT OF GROWTH IN CHILDREN BORN TO MOTHERS WITH HUMAN-IMMUNODEFICIENCY-VIRUS INFECTION. <i>ARCHIVES OF PEDIATRICS &amp; ADOLESCENT MEDICINE</i> <b>149</b> , 497-502.                                                                                 |
| 3. Arpadi SM, Wang J, Cuff PA <i>et al.</i> (1996) Application of bioimpedance analysis for estimating body composition in prepubertal children infected with human immunodeficiency virus type 1. <i>J Pediatr</i> <b>129</b> , 755-757.                                                                                             |
| 4. Miller TL, Orav EJ, Colan SD, Lipshultz SE (1997) Nutritional status and cardiac mass and function in children infected with the human immunodeficiency virus. <i>AMERICAN JOURNAL OF CLINICAL NUTRITION</i> <b>66</b> , 660-664.                                                                                                  |
| 5. Arpadi SM, Horlick MNB, Wang J <i>et al.</i> (1998) Body composition in prepubertal children with human immunodeficiency virus type I infection. <i>Archives of Pediatrics and Adolescent Medicine</i> <b>152</b> , 688-693.                                                                                                       |
| 6. Henderson RA, Talusan K, Hutton N <i>et al.</i> (1998) Resting energy expenditure and body composition in children with HIV infection. <i>J Acquir Immune Defic Syndr Hum Retrovirol</i> <b>19</b> , 150-157.                                                                                                                      |
| 7. Fontana M, Zuin G, Plebani A <i>et al.</i> (1999) Body composition in HIV-infected children: relations with disease progression and survival. <i>Am J Clin Nutr</i> <b>69</b> , 1282-1286.                                                                                                                                         |
| 8. Fox-Wheeler S, Heller L, Salata CM <i>et al.</i> (1999) Evaluation of the effects of oxandrolone on malnourished HIV-positive pediatric patients. <i>Pediatrics</i> <b>104</b> , e73.                                                                                                                                              |
| 9. Arpadi SM, Cuff PA, Arpadi SM <i>et al.</i> (2000) Growth velocity, fat-free mass and energy intake are inversely related to viral load in HIV-infected children. <i>Journal of Nutrition</i> <b>130</b> , 2498-2502.                                                                                                              |
| 10. Fiore P, Donelli E, Boni S <i>et al.</i> (2000) Nutritional status changes in HIV-infected children receiving combined antiretroviral therapy including protease inhibitors. <i>INTERNATIONAL JOURNAL OF ANTIMICROBIAL AGENTS</i> <b>16</b> , 365-369.                                                                            |
| 11. Heller L, Fox S, Hell KJ, Church JA (2000) Development of an instrument to assess nutritional risk factors for children infected with human immunodeficiency virus. <i>J Am Diet Assoc</i> <b>100</b> , 323-329.                                                                                                                  |
| 12. Jansen AK, Lopez FA (2000) Avaliação da composição corporal por antropometria: crianças com síndrome da imunodeficiência humana. <i>Rev paul pediatr</i> <b>18</b> , 59-68.                                                                                                                                                       |
| 13. Jaquet D, Lévine M, Ortega-Rodriguez E <i>et al.</i> (2000) Clinical and metabolic presentation of the lipodystrophic syndrome in HIV-infected children. <i>Aids</i> <b>14</b> , 2123-2128.                                                                                                                                       |
| 14. Keyser RE, Peralta L, Cade WT <i>et al.</i> (2000) Functional aerobic impairment in adolescents seropositive for HIV: a quasiexperimental analysis. <i>Arch Phys Med Rehabil</i> <b>81</b> , 1479-1484.                                                                                                                           |
| 15. Missmer SA, Spiegelman D, Gorbach SL, Miller TL (2000) Predictors of change in the functional status of children with human immunodeficiency virus infection. <i>PEDIATRICS</i> <b>106</b> .                                                                                                                                      |
| 16. Arpadi SM, Cuff PA, Horlick M <i>et al.</i> (2001) Lipodystrophy in HIV-infected children is associated with high viral load and low CD4+ -lymphocyte count and CD4+ -lymphocyte percentage at baseline and use of protease inhibitors and stavudine. <i>J Acquir Immune Defic Syndr</i> <b>27</b> , 30-34.                       |
| 17. Brambilla P, Bricalli D, Sala N <i>et al.</i> (2001) Highly active antiretroviral-treated HIV-infected children show fat distribution changes even in absence of lipodystrophy. <i>Aids</i> <b>15</b> , 2415-2422.                                                                                                                |
| 18. Dreimane D, Nielsen K, Deveikis A <i>et al.</i> (2001) Effect of protease inhibitors combined with standard antiretroviral therapy on linear growth and weight gain in human immunodeficiency virus type 1-infected children. <i>PEDIATRIC INFECTIOUS DISEASE JOURNAL</i> <b>20</b> , 315-316.                                    |
| 19. Ellis KJ, Shypailo RJ, Hardin DS <i>et al.</i> (2001) Z score prediction model for assessment of bone mineral content in pediatric diseases. <i>J Bone Miner Res</i> <b>16</b> , 1658-1664.                                                                                                                                       |
| 20. Melvin AJ, Lennon S, Mohan KM, Purnell JQ (2001) Metabolic abnormalities in HIV type 1-infected children treated and not treated with protease inhibitors. <i>AIDS Res Hum Retroviruses</i> <b>17</b> , 1117-1123.                                                                                                                |
| 21. Miller TL, Mawn BE, Orav EJ <i>et al.</i> (2001) The effect of protease inhibitor therapy on growth and body composition in human immunodeficiency virus type 1-infected children. <i>Pediatrics</i> <b>107</b> , E77.                                                                                                            |
| 22. Mora S, Sala N, Bricalli D <i>et al.</i> (2001) Bone mineral loss through increased bone turnover in HIV-infected children treated with highly active antiretroviral therapy. <i>Aids</i> <b>15</b> , 1823-1829.                                                                                                                  |
| 23. O'Brien KO, Razavi M, Henderson RA <i>et al.</i> (2001) Bone mineral content in girls perinatally infected with HIV. <i>Am J Clin Nutr</i> <b>73</b> , 821-826.                                                                                                                                                                   |
| 24. Tan BM, Nelson Jr RP, James-Yarish M <i>et al.</i> (2001) Bone metabolism in children with human immunodeficiency virus infection receiving highly active anti-retroviral therapy including a protease inhibitor. <i>Journal of Pediatrics</i> <b>139</b> , 447-451.                                                              |
| 25. Amaya RA, Kozinetz CA, McMeans A <i>et al.</i> (2002) Lipodystrophy syndrome in human immunodeficiency virus-infected children. <i>Pediatr Infect Dis J</i> <b>21</b> , 405-410.                                                                                                                                                  |
| 26. Arpadi SM, Horlick M, Thornton J <i>et al.</i> (2002) Bone mineral content is lower in prepubertal HIV-infected children. <i>J Acquir Immune Defic Syndr</i> <b>29</b> , 450-454.                                                                                                                                                 |
| 27. Cade WT, Peralta L, Keyser RE (2002) Aerobic capacity in late adolescents infected with HIV and controls. <i>Pediatr Rehabil</i> <b>5</b> , 161-169.                                                                                                                                                                              |
| 28. Cossarizza A, Pinti M, Moretti L <i>et al.</i> (2002) Mitochondrial functionality and mitochondrial DNA content in lymphocytes of vertically infected human immunodeficiency virus-positive children with highly active antiretroviral therapy-related lipodystrophy. <i>Journal of Infectious Diseases</i> <b>185</b> , 299-305. |
| 29. Horlick M, Arpadi SM, Bethel J <i>et al.</i> (2002) Bioelectrical impedance analysis models for prediction of total body water and fat-free mass in healthy and HIV-infected children and adolescents. <i>American Journal of Clinical Nutrition</i> <b>76</b> , 991-999.                                                         |
| 30. Nachman SA, Lindsey JC, Pelton S <i>et al.</i> (2002) Growth in human immunodeficiency virus-infected children receiving ritonavir-containing antiretroviral therapy. <i>ARCHIVES OF PEDIATRICS &amp; ADOLESCENT MEDICINE</i> <b>156</b> , 497-503.                                                                               |
| 31. Rondanelli M, Caselli D, Aricò M <i>et al.</i> (2002) Insulin-like growth factor I (IGF-I) and IGF-binding protein 3 response to growth hormone is impaired in HIV-infected children. <i>AIDS RESEARCH AND HUMAN RETROVIRUSES</i> <b>18</b> , 331-339.                                                                            |

32. Verweel G, van Rossum AMC, Hartwig NG *et al.* (2002) Treatment with highly active antiretroviral therapy in human immunodeficiency virus type 1-infected children is associated with a sustained effect on growth. *PEDIATRICS* **109**.
33. Beregszászi M, Jaquet D, Lévine M *et al.* (2003) Severe insulin resistance contrasting with mild anthropometric changes in the adipose tissue of HIV-infected children with lipohypertrophy. *Int J Obes Relat Metab Disord* **27**, 25-30.
34. Bitnun A, Sochetti E, Babyn P *et al.* (2003) Serum lipids, glucose homeostasis and abdominal adipose tissue distribution in protease inhibitor-treated and naive HIV-infected children. *Aids* **17**, 1319-1327.
35. Bockhorst JL, Ksseyri I, Tøye M *et al.* (2003) Evidence of human immunodeficiency virus-associated lipodystrophy syndrome in children treated with protease inhibitors. *Pediatr Infect Dis J* **22**, 463-465.
36. McComsey G, Bhumbra N, Rathore M, Alvarez A (2003) Impact of protease inhibitor substitution with efavirenz in HIV-infected children: Results of the first pediatric switch study. *PEDIATRICS* **111**.
37. Viganò A, Mora S, Brambilla P *et al.* (2003) Impaired growth hormone secretion correlates with visceral adiposity in highly active antiretroviral treated HIV-infected adolescents. *Aids* **17**, 1435-1441.
38. Viganò A, Mora S, Testolin C *et al.* (2003) Increased lipodystrophy is associated with increased exposure to highly active antiretroviral therapy in HIV-infected children. *J Acquir Immune Defic Syndr* **32**, 482-489.
39. Zamboni G, Antoniazzi F, Bertoldo F *et al.* (2003) Altered bone metabolism in children infected with human immunodeficiency virus. *Acta Paediatr* **92**, 12-16.
40. Ghaffari G, Passalacqua DJ, Caicedo JL *et al.* (2004) Two-year clinical and immune outcomes in human immunodeficiency virus-infected children who reconstitute CD4 T cells without control of viral replication after combination antiretroviral therapy. *Pediatrics* **114**, e604-611.
41. Hardin DS, Ellis KJ, Rice J, Doyle ME (2004) Protease inhibitor therapy improves protein catabolism in prepubertal children with HIV infection. *J Pediatr Endocrinol Metab* **17**, 321-325.
42. Mora S, Zamproni I, Beccio S *et al.* (2004) Longitudinal changes of bone mineral density and metabolism in antiretroviral-treated human immunodeficiency virus-infected children. *J Clin Endocrinol Metab* **89**, 24-28.
43. Panamonta O, Kosalaraksa P, Thinkhamrop B *et al.* (2004) Endocrine function in Thai children infected with human immunodeficiency virus. *JOURNAL OF PEDIATRIC ENDOCRINOLOGY & METABOLISM* **17**, 33-40.
44. Rojo Conejo P, Ramos Amador JT, García Piñar L *et al.* (2004) Decreased bone mineral density in HIV-infected children receiving highly active antiretroviral therapy. *An Pediatr (Barc)* **60**, 249-253.
45. Stagi S, Bindi G, Galluzzi F *et al.* (2004) Changed bone status in human immunodeficiency virus type 1 (HIV-1) perinatally infected children is related to low serum free IGF-1. *CLINICAL ENDOCRINOLOGY* **61**, 692-699.
46. Taylor P, Worrell C, Steinberg SM *et al.* (2004) Natural history of lipid abnormalities and fat redistribution among human immunodeficiency virus-infected children receiving long-term, protease inhibitor-containing, highly active antiretroviral therapy regimens. *Pediatrics* **114**, e235-242.
47. Thorne C (2004) Antiretroviral therapy, fat redistribution and hyperlipidaemia in HIV-infected children in Europe. *AIDS* **18**, 1443-1451.
48. Aldámiz-Echevarría L, Pocheville I, Sanjurjo P *et al.* (2005) Abnormalities in plasma fatty acid composition in human immunodeficiency virus-infected children treated with protease inhibitors. *ACTA PAEDIATRICA* **94**, 672-677.
49. Bitnun A, Sochetti E, Dick PT *et al.* (2005) Insulin sensitivity and  $\beta$ -cell function in protease inhibitor-treated and -naive human immunodeficiency virus-infected children. *JOURNAL OF CLINICAL ENDOCRINOLOGY & METABOLISM* **90**, 168-174.
50. Giacomet V, Mora S, Martelli L *et al.* (2005) A 12-month treatment with tenofovir does not impair bone mineral accrual in HIV-infected children. *J Acquir Immune Defic Syndr* **40**, 448-450.
51. Hardin DS, Rice J, Doyle ME, Pavia A (2005) Growth hormone improves protein catabolism and growth in prepubertal children with HIV infection. *Clin Endocrinol (Oxf)* **63**, 259-262.
52. Hazra R, Gafni RI, Maldarelli F *et al.* (2005) Tenofovir disoproxil fumarate and an optimized background regimen of antiretroviral agents as salvage therapy for pediatric HIV infection. *Pediatrics* **116**, e846-e854.
53. Jacobson DL, Spiegelman D, Duggan C *et al.* (2005) Predictors of bone mineral density in human immunodeficiency virus-1 infected children. *J Pediatr Gastroenterol Nutr* **41**, 339-346.
54. Mora S, Zamproni I, Giacomet V *et al.* (2005) Analysis of bone mineral content in horizontally HIV-infected children naïve to antiretroviral treatment. *Calcified Tissue International* **76**, 336-340.
55. Pitukcheewanont P, Safani D, Church J, Gilsanz V (2005) Bone measures in HIV-1 infected children and adolescents: disparity between quantitative computed tomography and dual-energy X-ray absorptiometry measurements. *Osteoporos Int* **16**, 1393-1396.
56. Rosso R, Vignolo M, Parodi A *et al.* (2005) Bone quality in perinatally HIV-infected children: role of age, sex, growth, HIV infection, and antiretroviral therapy. *AIDS Res Hum Retroviruses* **21**, 927-932.
57. Viganò A, Mora S, Manzoni P *et al.* (2005) Effects of recombinant growth hormone on visceral fat accumulation: pilot study in human immunodeficiency virus-infected adolescents. *J Clin Endocrinol Metab* **90**, 4075-4080.
58. Barros C, Araújo T, Andrade E *et al.* (2006) Avaliação das variáveis de força muscular, agilidade e composição corporal em crianças vivendo com HIV/AIDS. *Rev bras ciênc mov* **14**, 47-54.
59. Ergun-Longmire B, Lin-Su K, Dunn AM *et al.* (2006) Effects of protease inhibitors on glucose tolerance, lipid metabolism, and body composition in children and adolescents infected with human immunodeficiency virus. *Endocr Pract* **12**, 514-521.
60. Gafni RI, Hazra R, Reynolds JC *et al.* (2006) Tenofovir disoproxil fumarate and an optimized background regimen of antiretroviral agents as salvage therapy: impact on bone mineral density in HIV-infected children. *Pediatrics* **118**, e711-718.
61. Gutierrez S, De León M, Cuñetti L *et al.* (2006) Dislipemia y lipodistrofia en niños uruguayos VIH positivos en tratamiento antirretroviral. *Rev méd Urug* **22**, 197-202.
62. Haroun D, Wells J, Lau C *et al.* (2006) Assessment of obesity status in outpatients from three disease states. *Acta Paediatrica, International Journal of Paediatrics* **95**, 970-974.
63. Hartman K, Verweel G, de Groot R, Hartwig NG (2006) Detection of lipoatrophy in human immunodeficiency virus-1-infected children treated with highly active antiretroviral therapy. *Pediatr Infect Dis J* **25**, 427-431.

64. Moscicki AB, Ellenberg JH, Murphy DA, Xu JH (2006) Associations among body composition, androgen levels, and human immunodeficiency virus status in adolescents. *JOURNAL OF ADOLESCENT HEALTH* **39**, 164-173.
65. Verkauskienė R, Dollfus C, Levine M *et al.* (2006) Serum adiponectin and leptin concentrations in HIV-infected children with fat redistribution syndrome. *Pediatr Res* **60**, 225-230.
66. Weidle PJ, Abrams EJ, Gvetadze R *et al.* (2006) A simplified weight-based method for pediatric drug dosing for zidovudine and didanosine in resource-limited settings. *Pediatr Infect Dis J* **25**, 59-64.
67. Chantry CJ, Frederick MM, Meyer WA, 3rd *et al.* (2007) Endocrine abnormalities and impaired growth in human immunodeficiency virus-infected children. *Pediatr Infect Dis J* **26**, 53-60.
68. Dzwonek AB, Novelli V, Schwenk A (2007) Serum leptin concentrations and fat redistribution in HIV-1-infected children on highly active antiretroviral therapy. *HIV Med* **8**, 433-438.
69. Ene L, Goetghebuer T, Hainaut M *et al.* (2007) Prevalence of lipodystrophy in HIV-infected children: a cross-sectional study. *EUROPEAN JOURNAL OF PEDIATRICS* **166**, 13-21.
70. Kim RJ, Carlow DC, Rutstein JH, Rutstein RM (2007) Hypoadiponectinemia, dyslipidemia, and impaired growth in children with HIV-associated facial lipoatrophy. *JOURNAL OF PEDIATRIC ENDOCRINOLOGY & METABOLISM* **20**, 65-74.
71. McComsey GA, O'Riordan M, Hazen SL *et al.* (2007) Increased carotid intima media thickness and cardiac biomarkers in HIV infected children. *Aids* **21**, 921-927.
72. Mora S, Zamproni I, Cafarelli L *et al.* (2007) Alterations in circulating osteoimmune factors may be responsible for high bone resorption rate in HIV-infected children and adolescents. *Aids* **21**, 1129-1135.
73. Papaevangelou V, Papassotiropoulos I, Vounatsou M *et al.* (2007) Changes in leptin serum levels in HIV-infected children receiving highly active antiretroviral therapy. *Scand J Clin Lab Invest* **67**, 291-296.
74. Tremeschin MH, Cervi MC, Camelo Júnior JS *et al.* (2007) Niacin nutritional status in HIV type 1-positive children: preliminary data. *J Pediatr Gastroenterol Nutr* **44**, 629-633.
75. Viganò A, Brambilla P, Cafarelli L *et al.* (2007) Normalization of fat accrual in lipoatrophic, HIV-infected children switched from stavudine to tenofovir and from protease inhibitor to efavirenz. *Antiviral Therapy* **12**, 297-302.
76. Viganò A, Zuccotti GV, Martelli L *et al.* (2007) Renal safety of tenofovir in HIV-infected children: A prospective, 96-week longitudinal study. *Clinical Drug Investigation* **27**, 573-581.
77. Chantry CJ, Hughes MD, Alvero C *et al.* (2008) Insulin-like growth factor-1 and lean body mass in HIV-infected children. *JAIDS-JOURNAL OF ACQUIRED IMMUNE DEFICIENCY SYNDROMES* **48**, 437-443.
78. Gonzalez-Tome MI, Amador JTR, Peña JM *et al.* (2008) Outcome of protease inhibitor substitution with nevirapine in HIV-1 infected children. *BMC Infectious Diseases* **8**.
79. Miller TL, Orav EJ, Lipshultz SE *et al.* (2008) Risk Factors for Cardiovascular Disease in Children Infected with Human Immunodeficiency Virus-1. *JOURNAL OF PEDIATRICS* **153**, 491-497.
80. Purdy JB, Gafni RI, Reynolds JC *et al.* (2008) Decreased bone mineral density with off-label use of tenofovir in children and adolescents infected with human immunodeficiency virus. *Journal of Pediatrics* **152**, 582-584.
81. Sharma TS, Kinnamon DD, Duggan C *et al.* (2008) Changes in macronutrient intake among HIV-infected children between 1995 and 2004. *AMERICAN JOURNAL OF CLINICAL NUTRITION* **88**, 384-391.
82. Spagnuolo MI, Bruzzese E, Vallone GF *et al.* (2008) Is resistin a link between highly active antiretroviral therapy and fat redistribution in HIV-infected children? *J Endocrinol Invest* **31**, 592-596.
83. Aldrovandi GM, Lindsey JC, Jacobson DL *et al.* (2009) Morphologic and metabolic abnormalities in vertically HIV-infected children and youth. *Aids* **23**, 661-672.
84. Arpadi SM, Bethel J, Horlick M *et al.* (2009) Longitudinal changes in regional fat content in HIV-infected children and adolescents. *Aids* **23**, 1501-1509.
85. López P, Caicedo Y, Rubiano LC *et al.* (2009) Alteraciones metabólicas con terapia antirretroviral altamente efectiva en niños positivos para VIH, Cali, Colombia. *Infectio* **13**, 283-292.
86. Mora S, Viganò A, Cafarelli L *et al.* (2009) Applicability of quantitative ultrasonography of the radius and tibia in HIV-infected children and adolescents. *J Acquir Immune Defic Syndr* **51**, 588-592.
87. Sarni ROS, Souza FISd, Battistini TRB *et al.* (2009) Lipodistrofia em crianças e adolescentes com síndrome da imunodeficiência adquirida e sua relação com a terapia antirretroviral empregada. *J pediatr (Rio J)* **85**, 329-334.
88. Viganò A, Brambilla P, Pattarino G *et al.* (2009) Long-Term Evaluation of Glucose Homeostasis in a Cohort of HAART-Treated HIV-Infected Children: A Longitudinal, Observational Cohort Study. *Clinical Drug Investigation* **29**, 101-109.
89. Cervia JS, Chantry CJ, Hughes MD *et al.* (2010) Associations of Proinflammatory Cytokine Levels With Lipid Profiles, Growth, and Body Composition in HIV-infected Children Initiating or Changing Antiretroviral Therapy. *PEDIATRIC INFECTIOUS DISEASE JOURNAL* **29**, 1118-1122.
90. Chantry CJ, Cervia JS, Hughes MD *et al.* (2010) Predictors of growth and body composition in HIV-infected children beginning or changing antiretroviral therapy. *HIV MEDICINE* **11**, 573-583.
91. Jacobson DL, Lindsey JC, Gordon CM *et al.* (2010) Total body and spinal bone mineral density across Tanner stage in perinatally HIV-infected and uninfected children and youth in PACTG 1045. *AIDS* **24**, 687-696.
92. Miller TL, Somarriba G, Kinnamon DD *et al.* (2010) The effect of a structured exercise program on nutrition and fitness outcomes in human immunodeficiency virus-infected children. *AIDS Res Hum Retroviruses* **26**, 313-319.
93. Miller TL, Somarriba G, Orav EJ *et al.* (2010) Biomarkers of vascular dysfunction in children infected with human immunodeficiency virus-1. *J Acquir Immune Defic Syndr* **55**, 182-188.
94. Stagi S, Galli L, Cecchi C *et al.* (2010) Final Height in Patients Perinatally Infected with the Human Immunodeficiency Virus. *HORMONE RESEARCH IN PAEDIATRICS* **74**, 165-171.
95. Viganò A, Zuccotti GV, Puzovio M *et al.* (2010) Tenofovir disoproxil fumarate and bone mineral density: a 60-month longitudinal study in a cohort of HIV-infected youths. *Antivir Ther* **15**, 1053-1058.
96. Werner MLF, Pone MVdS, Fonseca VM, Chaves CRMdM (2010) Síndrome da lipodistrofia e fatores de risco cardiovasculares em crianças e adolescentes infectados pelo HIV/AIDS em uso de terapia antirretroviral de alta potência. *J pediatr (Rio J)* **86**, 27-32.

97. Zuccotti G, Viganò A, Gabiano C *et al.* (2010) Antiretroviral therapy and bone mineral measurements in HIV-infected youths. *Bone* **46**, 1633-1638.
98. Contri PV, Berchielli ÉM, Tremeschin MH *et al.* (2011) Nutritional status and lipid profile of HIV-positive children and adolescents using antiretroviral therapy. *Clinics* **66**, 997-1002.
99. da Silva QH, Pedro FL, Kirsten VR (2011) Body satisfaction and lipodystrophy characteristics in HIV/AIDS children and teenagers undergoing highly active antiretroviral therapy. *Revista Paulista de Pediatria* **29**, 357-363.
100. Dimock D, Thomas V, Cushing A *et al.* (2011) Longitudinal assessment of metabolic abnormalities in adolescents and young adults with HIV-infection acquired perinatally or in early childhood. *Metabolism* **60**, 874-880.
101. Geffner ME, Patel K, Miller TL *et al.* (2011) Factors Associated with Insulin Resistance among Children and Adolescents Perinatally Infected with HIV-1 in the Pediatric HIV/AIDS Cohort Study. *HORMONE RESEARCH IN PAEDIATRICS* **76**, 386-391.
102. Jacobson DL, Patel K, Siberry GK *et al.* (2011) Body fat distribution in perinatally HIV-infected and HIV-exposed but uninfected children in the era of highly active antiretroviral therapy: outcomes from the Pediatric HIV/AIDS Cohort Study. *AMERICAN JOURNAL OF CLINICAL NUTRITION* **94**, 1485-1495.
103. Mohd NM, Yeo J, Huang MS *et al.* (2011) Nutritional status of children living with HIV and receiving antiretroviral (ARV) medication in the Klang Valley, Malaysia. *Malays J Nutr* **17**, 19-30.
104. Morén C, Noguera-Julian A, Rovira N *et al.* (2011) Mitochondrial impact of human immunodeficiency virus and antiretrovirals on infected pediatric patients with or without lipodystrophy. *Pediatr Infect Dis J* **30**, 992-995.
105. Ramalho LCD, Gonçalves EM, de Carvalho WRG *et al.* (2011) Abnormalities in body composition and nutritional status in HIV-infected children and adolescents on antiretroviral therapy. *INTERNATIONAL JOURNAL OF STD & AIDS* **22**, 453-456.
106. Resino S, Micheloud D, Lorente R *et al.* (2011) Adipokine profiles and lipodystrophy in HIV-infected children during the first 4 years on highly active antiretroviral therapy. *HIV MEDICINE* **12**, 54-60.
107. Spoulou V, Kanaka-Gantenbein C, Bathrellou I *et al.* (2011) Monitoring of lipodystrophic and metabolic abnormalities in HIV-1 infected children on antiretroviral therapy. *Hormones (Athens)* **10**, 149-155.
108. Tremeschin MH, Sartorelli DS, Cervi MC *et al.* (2011) Nutritional assessment and lipid profile in HIV-infected children and adolescents treated with highly active antiretroviral therapy. *Rev Soc Bras Med Trop* **44**, 274-281.
109. Viganò A, Zuccotti GV, Cerini C *et al.* (2011) Lipodystrophy, insulin resistance, and adiponectin concentration in HIV-infected children and adolescents. *Curr HIV Res* **9**, 321-326.
110. Alam N, Cortina-Borja M, Goetghebuer T *et al.* (2012) Body Fat Abnormality in HIV-Infected Children and Adolescents Living in Europe: Prevalence and Risk Factors. *JAIDS-JOURNAL OF ACQUIRED IMMUNE DEFICIENCY SYNDROMES* **59**, 314-324.
111. Arpadi SM, McMahon DJ, Abrams EJ *et al.* (2012) Effect of supplementation with cholecalciferol and calcium on 2-y bone mass accrual in HIV-infected children and adolescents: a randomized clinical trial. *Am J Clin Nutr* **95**, 678-685.
112. Bhargav H, Huilgol V, Metri K *et al.* (2012) Evidence for extended age dependent maternal immunity in infected children: mother to child transmission of HIV infection and potential interventions including sulfatides of the human fetal adnexa and complementary or alternative medicines. *J Stem Cells* **7**, 127-153.
113. Innes S, Cotton MF, Haubrich R *et al.* (2012) High prevalence of lipoatrophy in pre-pubertal South African children on antiretroviral therapy: a cross-sectional study. *BMC PEDIATRICS* **12**.
114. Lindsey JC, Jacobson DL, Li H *et al.* (2012) Using cluster heat maps to investigate relationships between body composition and laboratory measurements in HIV-infected and HIV-uninfected children and young adults. *J Acquir Immune Defic Syndr* **59**, 325-328.
115. Miller TL, Borkowsky W, DiMeglio LA *et al.* (2012) Metabolic abnormalities and viral replication are associated with biomarkers of vascular dysfunction in HIV-infected children. *HIV MEDICINE* **13**, 264-275.
116. Negra MD, De Carvalho AP, De Aquino MZ *et al.* (2012) A randomized study of tenofovir disoproxil fumarate in treatment-experienced HIV-1 infected adolescents. *Pediatric infectious disease journal* **31**, 469-473.
117. Puthanakit T, Saksawad R, Bunupuradah T *et al.* (2012) Prevalence and risk factors of low bone mineral density among perinatally HIV-infected Thai adolescents receiving antiretroviral therapy. *J Acquir Immune Defic Syndr* **61**, 477-483.
118. Ramos E, Gutierrez-Teissonniere S, Conde JG *et al.* (2012) Anaerobic power and muscle strength in human immunodeficiency virus-positive preadolescents. *PM & R: Journal of Injury, Function & Rehabilitation* **4**, 171-175.
119. Schtscherbyna A, Pinheiro MPMC, Mendonça LMC *et al.* (2012) Factors associated with low bone mineral density in a Brazilian cohort of vertically HIV-infected adolescents. *International Journal of Infectious Diseases* **16**, e872-e878.
120. Arpadi S, Shiao S, Strehlau R *et al.* (2013) Metabolic abnormalities and body composition of HIV-infected children on Lopinavir or Nevirapinebased antiretroviral therapy. *Archives of Disease in Childhood: Education and Practice Edition* **98**, 258-264.
121. Bunders MJ, Frinking O, Scherpier HJ *et al.* (2013) Bone mineral density increases in HIV-infected children treated with long-term combination antiretroviral therapy. *Clin Infect Dis* **56**, 583-586.
122. Chokephaibulkit K, Saksawad R, Bunupuradah T *et al.* (2013) Prevalence of vitamin d deficiency among perinatally HIV-infected Thai adolescents receiving antiretroviral therapy. *Pediatric Infectious Disease Journal* **32**, 1237-1239.
123. DiMeglio LA, Wang J, Siberry GK *et al.* (2013) Bone mineral density in children and adolescents with perinatal HIV infection. *Aids* **27**, 211-220.
124. Dos Santos FF, Pereira FB, da Silva CLO *et al.* (2013) Immunological and virological characteristics and performance in the variables flexibility and abdominal resistance strength of HIV/AIDS adolescents under highly active antirretroviral therapy. *Revista Brasileira de Medicina do Esporte* **19**, 40-43.
125. Fabiano V, Giacomet V, Viganò A *et al.* (2013) Long-term body composition and metabolic changes in HIV-infected children switched from stavudine to tenofovir and from protease inhibitors to efavirenz. *Eur J Pediatr* **172**, 1089-1096.
126. Innes S, Schulte-Kemna E, Cotton MF *et al.* (2013) Biceps skin-fold thickness may detect and predict early lipoatrophy in HIV-infected children. *Pediatr Infect Dis J* **32**, e254-262.
127. Lima LR, Silva RC, Giuliano Ide C *et al.* (2013) Bone mass in children and adolescents infected with human immunodeficiency virus. *J Pediatr (Rio J)* **89**, 91-99.
128. Macdonald HM, Chu J, Nettlefold L *et al.* (2013) Bone geometry and strength are adapted to muscle force in children and adolescents perinatally infected with HIV. *JOURNAL OF MUSCULOSKELETAL & NEURONAL INTERACTIONS* **13**, 53-65.

129. Palchetti CZ, Patin RV, Gouvêa AdFTB *et al.* (2013) Body composition and lipodystrophy in prepubertal HIV-infected children. *Braz j infect dis* **17**, 1-6.
130. Palchetti CZ, Patin RV, MacHado DM *et al.* (2013) Body composition in prepubertal, HIV-infected children: A comparison of bioelectrical impedance analysis and dual-energy X-ray absorptiometry. *Nutrition in Clinical Practice* **28**, 247-252.
131. Sharma TS, Jacobson DL, Anderson L *et al.* (2013) Short Communication: The Relationship Between Mitochondrial Dysfunction and Insulin Resistance in HIV-Infected Children Receiving Antiretroviral Therapy. *AIDS RESEARCH AND HUMAN RETROVIRUSES* **29**, 1211-1217.
132. Somarriba G, Lopez-Mitnik G, Ludwig DA *et al.* (2013) Physical fitness in children infected with the human immunodeficiency virus: associations with highly active antiretroviral therapy. *AIDS Res Hum Retroviruses* **29**, 112-120.
133. Agostinho A, Escobal N, Bologna R *et al.* (2014) Prevalencia de factores de riesgo de enfermedad cardiovascular en niños y adolescentes con infección por HIV. *Med infant* **21**, 301-309.
134. Dejckhamron P, Unachak K, Aupibul L, Sirisanthana V (2014) Insulin resistance and lipid profiles in HIV-infected Thai children receiving lopinavir/ritonavir-based highly active antiretroviral therapy. *JOURNAL OF PEDIATRIC ENDOCRINOLOGY & METABOLISM* **27**, 403-412.
135. Foissac F, Meyzer C, Frange P *et al.* (2014) Determination of optimal vitamin D3 dosing regimens in HIV-infected paediatric patients using a population pharmacokinetic approach. *Br J Clin Pharmacol* **78**, 1113-1121.
136. Hillesheim E, Lima LRA, Silva RCR, Trindade EBSM (2014) Dietary intake and nutritional status of HIV-1-infected children and adolescents in Florianópolis, Brazil. *International Journal of STD and AIDS* **25**, 439-447.
137. Humphries C, Potterton J, Mudzi W (2014) A pilot study to investigate the muscle strength of children infected with HIV. *International Journal of Therapy and Rehabilitation* **21**, 19-24.
138. Musiime V, Cook A, Kayiwa J *et al.* (2014) Anthropometric measurements and lipid profiles to detect early lipodystrophy in antiretroviral therapy experienced HIV-infected children in the CHAPAS-3 trial. *ANTIVIRAL THERAPY* **19**, 269-276.
139. Theodoridou K, Margeli A, Spoulou V *et al.* (2014) Non-traditional adipokines in pediatric HIV-related lipodystrophy: a-FABP as a biomarker of central fat accumulation. *Scand J Clin Lab Invest* **74**, 67-73.
140. Vreeman RC, Nyandiko WM, Liechty EA *et al.* (2014) Impact of adherence and anthropometric characteristics on nevirapine pharmacokinetics and exposure among HIV-infected Kenyan children. *J Acquir Immune Defic Syndr* **67**, 277-286.
141. Aupibul L, Cressey TR, Sricharoenchai S *et al.* (2015) Efficacy, safety and pharmacokinetics of tenofovir disoproxil fumarate in virologic-suppressed HIV-infected children using weight-band dosing. *Pediatr Infect Dis J* **34**, 392-397.
142. Cohen S, Innes S, Geelen SPM *et al.* (2015) Long-Term Changes of Subcutaneous Fat Mass in HIV-Infected Children on Antiretroviral Therapy: A Retrospective Analysis of Longitudinal Data from Two Pediatric HIV-Cohorts. *PLOS ONE* **10**.
143. Della Negra M, De Carvalho AP, De Aquino MZ *et al.* (2015) Long-term efficacy and safety of tenofovir disoproxil fumarate in HIV-1-infected adolescents failing antiretroviral therapy: the final results of study GS-US-104-0321. *Pediatr Infect Dis J* **34**, 398-405.
144. dos Reis LC, Rondó PHD, Marques HHD, Segri NJ (2015) Anthropometry and body composition of vertically HIV-infected children and adolescents under therapy with and without protease inhibitors. *PUBLIC HEALTH NUTRITION* **18**, 1255-1261.
145. Mora S, Puzzovio M, Giacomet V *et al.* (2015) Sclerostin and DKK-1: two important regulators of bone metabolism in HIV-infected youths. *Endocrine* **49**, 783-790.
146. Palchetti CZ, Szejnfeld VL, Succi RCdM *et al.* (2015) Impaired bone mineral accrual in prepubertal HIV-infected children: a cohort study. *Braz j infect dis* **19**, 623-630.
147. Swetha GK, Hemalatha R, Prasad UV *et al.* (2015) Health & nutritional status of HIV infected children in Hyderabad, India. *Indian J Med Res* **141**, 46-54.
148. Arpadi SM, Shiau S, Strehlau R *et al.* (2016) Efavirenz is associated with higher bone mass in South African children with HIV. *Aids* **30**, 2459-2467.
149. Gaur AH, Kizito H, Prasitsuebsai W *et al.* (2016) Safety, efficacy, and pharmacokinetics of a single-tablet regimen containing elvitegravir, cobicistat, emtricitabine, and tenofovir alafenamide in treatment-naïve, HIV-infected adolescents: a single-arm, open-label trial. *The Lancet HIV* **3**, e561-e568.
150. Lima LRAD, Krug RDR, Silva RCRD *et al.* (2016) Prediction of Areal Bone Mineral Density and Bone Mineral Content in Children and Adolescents Living With HIV Based on Anthropometric Variables. *Journal of Clinical Densitometry* **19**, 457-464.
151. Sonogo M, Sagrado MJ, Escobar G *et al.* (2016) Dyslipidemia, Diet and Physical Exercise in Children on Treatment With Antiretroviral Medication in El Salvador: A Cross-sectional Study. *PEDIATRIC INFECTIOUS DISEASE JOURNAL* **35**, 1111-1116.
152. Sudjaritruk T, Bunupuradah T, Aupibul L *et al.* (2016) Hypovitaminosis D and hyperparathyroidism: effects on bone turnover and bone mineral density among perinatally HIV-infected adolescents. *AIDS* **30**, 1059-1067.
153. Wong M, Shiau S, Yin MT *et al.* (2016) Decreased Vigorous Physical Activity in School-Aged Children with Human Immunodeficiency Virus in Johannesburg, South Africa. *JOURNAL OF PEDIATRICS* **172**, 103-109.
154. Carmo FB, Terreri MT, Succi RCM *et al.* (2017) Bone mineral density and vitamin D concentration: the challenges in taking care of children and adolescents infected with HIV. *Braz J Infect Dis* **21**, 270-275.
155. de Lima LRA, Santos Silva DA, Samara da Silva K *et al.* (2017) Aerobic Fitness and Moderate to Vigorous Physical Activity in Children and Adolescents Living with HIV. *Pediatric Exercise Science* **29**, 377-387.
156. Giacomet V, Maruca K, Ambrosi A *et al.* (2017) A 10-year follow-up of bone mineral density in HIV-infected youths receiving tenofovir disoproxil fumarate. *International Journal of Antimicrobial Agents* **50**, 365-370.
157. Jacobson DL, Stephensen CB, Miller TL *et al.* (2017) Associations of Low Vitamin D and Elevated Parathyroid Hormone Concentrations With Bone Mineral Density in Perinatally HIV-Infected Children. *J Acquir Immune Defic Syndr* **76**, 33-42.
158. Jiménez B, Sainz T, Díaz L *et al.* (2017) Low Bone Mineral Density in Vertically HIV-infected Children and Adolescents: Risk Factors and the Role of T-cell Activation and Senescence. *Pediatric Infectious Disease Journal* **36**, 578-583.
159. Lima LRAd, Back IdC, Beck CC, Caramelli B (2017) Exercise Improves Cardiovascular Risk Factors, Fitness, and Quality Of Life in Hiv+ Children and Adolescents: Pilot Study. *International Journal of Cardiovascular Sciences* **30**, 171-176.
160. Lima LRAD, Martins PC, Junior CASA *et al.* (2017) Are traditional body fat equations and anthropometry valid to estimate body fat in children and adolescents living with HIV? *Brazilian Journal of Infectious Diseases* **21**, 448-456.



161. Macdonald H, Nettlefold L, Maan EJ *et al.* (2017) Muscle power in children, youth and young adults who acquired HIV perinatally. *J Musculoskelet Neuronal Interact* **17**, 27-37.
162. Martins PC, De Lima LRA, Teixeira DM *et al.* (2017) Physical activity and body fat in adolescents living with HIV: A comparative study. *Revista Paulista de Pediatria* **35**, 69-77.
163. Risti Saptarini P, Riyanti E, Sufiawati I, Sasmita IS (2017) Level vitamin D, calcium serum and mandibular bone density in HIV/AIDS children. *Journal of International Dental and Medical Research* **10**, 313-317.
164. Sudjaritruk T, Bunupuradah T, Aupibul L *et al.* (2017) Adverse bone health and abnormal bone turnover among perinatally HIV-infected Asian adolescents with virological suppression. *HIV Medicine* **18**, 235-244.
165. Sudjaritruk T, Bunupuradah T, Aupibul L *et al.* (2017) Impact of tenofovir disoproxil fumarate on bone metabolism and bone mass among perinatally HIV-infected Asian adolescents. *ANTIVIRAL THERAPY* **22**, 471-479.
166. Ziegler TR, Judd SE, Ruff JH *et al.* (2017) Amino Acid Concentrations in HIV-Infected Youth Compared to Healthy Controls and Associations with CD4 Counts and Inflammation. *AIDS Res Hum Retroviruses* **33**, 681-689.
167. Archary M, McLlerson H, Bobat R *et al.* (2018) Population Pharmacokinetics of Lopinavir in Severely Malnourished HIV-infected Children and the Effect on Treatment Outcomes. *Pediatric Infectious Disease Journal* **37**, 349-355.
168. Cames C, Pascal L, Ba A *et al.* (2018) Low prevalence of lipodystrophy in HIV-infected Senegalese children on long-term antiretroviral treatment: the ANRS 12279 MAGGSEN Pediatric Cohort Study. *BMC INFECTIOUS DISEASES* **18**.
169. de Castro JAC, de Lima LRA, Silva DAS (2018) Accuracy of octa-polar bioelectrical impedance analysis for the assessment of total and appendicular body composition in children and adolescents with HIV: comparison with dual energy X-ray absorptiometry and air displacement plethysmography. *Journal of Human Nutrition & Dietetics* **31**, 276-285.
170. de Lima LRA, Monteiro Teixeira D, Custódio Martins P *et al.* (2018) Body image and anthropometric indicators in adolescents living with HIV. *Brazilian Journal of Kineanthropometry & Human Performance* **20**, 53-63.
171. De Lima LRA, Petroski EL, Moreno YMF *et al.* (2018) Dyslipidemia, chronic inflammation, and subclinical atherosclerosis in children and adolescents infected with HIV: The PositHIVE Health Study. *PLoS ONE* **13**.
172. Innes S, van der Laan L, Anderson PL *et al.* (2018) Can We Improve Stavudine's Safety Profile in Children? Pharmacokinetics of Intracellular Stavudine Triphosphate with Reduced Dosing. *Antimicrob Agents Chemother* **62**.
173. Jacobson DL, Lindsey JC, Coull BA *et al.* (2018) The Association of Fat and Lean Tissue with Whole Body and Spine Bone Mineral Density Is Modified by HIV Status and Sex in Children and Youth. *Pediatric Infectious Disease Journal* **37**, 71-77.
174. Puthanakit T, Wittawatmongkol O, Poomlek V *et al.* (2018) Effect of calcium and vitamin D supplementation on bone mineral accrual among HIV-infected Thai adolescents with low bone mineral density. *J Virus Erad* **4**, 6-11.
175. Ramteke SM, Shiao S, Foca M *et al.* (2018) Patterns of Growth, Body Composition, and Lipid Profiles in a South African Cohort of Human Immunodeficiency Virus-Infected and Uninfected Children: A Cross-Sectional Study. *JOURNAL OF THE PEDIATRIC INFECTIOUS DISEASES SOCIETY* **7**, 143-150.
176. Rosales JGV, Juárez Moya A, García Samano VM, Solórzano Santos F (2018) Lipodystrophy syndrome in HIV-1 infected pediatric patients, under highly effective antiretroviral therapy (HAART), attending at a high specialty hospital. *Enfermedades Infecciosas y Microbiología* **38**, 123-130.
177. Sharma TS, Somarriba G, Arheart KL *et al.* (2018) Longitudinal Changes in Body Composition by Dual-energy Radiograph Absorptiometry Among Perinatally HIV-infected and HIV-uninfected Youth: Increased Risk of Adiposity Among HIV-infected Female Youth. *Pediatr Infect Dis J* **37**, 1002-1007.
178. Shiao S, Yin MT, Strehlau R *et al.* (2018) Decreased bone turnover in HIV-infected children on antiretroviral therapy. *Arch Osteoporos* **13**, 40.
179. Strehlau R, Shiao S, Arpadi S *et al.* (2018) Substituting Abacavir for Stavudine in Children Who Are Virally Suppressed Without Lipodystrophy: Randomized Clinical Trial in Johannesburg, South Africa. *J Pediatric Infect Dis Soc* **7**, e70-e77.
180. Torrejón C, Galaz MI, Vizueta E *et al.* (2018) Evaluation of bone mineral density in children with vertical infection by HIV. *Rev Chilena Infectol* **35**, 634-641.
181. Alves Junior CAS, de Lima LRA, de Souza MC, Silva DAS (2019) Anthropometric measures associated with fat mass estimation in children and adolescents with HIV. *Appl Physiol Nutr Metab* **44**, 493-498.
182. Arpadi SM, Thurman CB, Patel F *et al.* (2019) Bone Quality Measured Using Calcaneal Quantitative Ultrasonography Is Reduced Among Children with HIV in Johannesburg, South Africa. *J Pediatr* **215**, 267-271.e262.
183. de Lima LRA, Silva DAS, do Nascimento Salvador PC *et al.* (2019) Prediction of peak V' O(2) in Children and Adolescents With HIV From an Incremental Cycle Ergometer Test. *Res Q Exerc Sport* **90**, 163-171.
184. de Lima LRA, Silva DAS, Petroski EL *et al.* (2019) Aerobic fitness and physical activity are inversely associated with body fat, dyslipidemia and inflammatory mediators in children and adolescents living with HIV. *Journal of Sports Sciences* **37**, 50-58.
185. Donà D, Mozzo E, Luise D *et al.* (2019) Impact of HIV-1 Infection and Antiretroviral Therapy on Bone Homeostasis and Mineral Density in Vertically Infected Patients. *Journal of Osteoporosis* **2019**.
186. Gregson CL, Hartley A, Majonga E *et al.* (2019) Older age at initiation of antiretroviral therapy predicts low bone mineral density in children with perinatally-infected HIV in Zimbabwe. *Bone* **125**, 96-102.
187. Maletle L, Etnier JL, Tladi DM *et al.* (2019) Predicting cognitive performance from physical activity and fitness in adolescents and young adults in Botswana relative to HIV status. *Sci Rep* **9**, 19583.
188. Maletle L, Tladi DM, Etnier JL *et al.* (2019) Examining psychosocial correlates of physical activity and sedentary behavior in youth with and without HIV. *PLoS One* **14**, e0225890.
189. Margossian R, Williams PL, Yu W *et al.* (2019) Markers of Bone Mineral Metabolism and Cardiac Structure and Function in Perinatally HIV-Infected and HIV-Exposed but Uninfected Children and Adolescents. *J Acquir Immune Defic Syndr* **81**, 238-246.
190. Marsico F, Lo Vecchio A, Paolillo S *et al.* (2019) Left Ventricular Function, Epicardial Adipose Tissue, and Carotid Intima-Media Thickness in Children and Adolescents With Vertical HIV Infection. *J Acquir Immune Defic Syndr* **82**, 462-467.
191. Martins PC, Lima LRA, Silva AM *et al.* (2019) Phase angle is associated with the physical fitness of HIV-infected children and adolescents. *Scandinavian Journal of Medicine & Science in Sports* **29**, 1006-1012.
192. Souza LAAd, Nogueira MM, Vianna TdS *et al.* (2019) Influence of body composition on the respiratory muscle strength of children exposed to antiretroviral therapy for human immunodeficiency virus. *Mundo saúde (Impr)* **43**, [955-975].

193. Jacobson DL, Lindsey JC, Gordon C *et al.* (2020) Alendronate Improves Bone Mineral Density in Children and Adolescents Perinatally Infected With Human Immunodeficiency Virus With Low Bone Mineral Density for Age. *Clinical infectious diseases* **71**, 1281-1288.
194. Jacobson DL, Yu W, Hazra R *et al.* (2020) Fractures in children and adolescents living with perinatally acquired HIV. *Bone* **139**, 115515.
195. Mahtab S, Scott C, Asafu-Agyei NAA *et al.* (2020) Prevalence and predictors of bone health among perinatally HIV-infected adolescents. *Aids* **34**, 2061-2070.
196. McHugh G, Rehman AM, Simms V *et al.* (2020) Chronic lung disease in children and adolescents with HIV: a case-control study. *Tropical Medicine and International Health* **25**, 590-599.
197. Naidoo CN, Benjamin-Damons N, Strehlau R, Potterton J (2020) The effects of a home exercise programme on the exercise endurance of children infected with HIV. *SOUTH AFRICAN JOURNAL OF CHILD HEALTH* **14**, 174-179.
198. Shiao S, Yin MT, Strehlau R *et al.* (2020) Deficits in Bone Architecture and Strength in Children Living With HIV on Antiretroviral Therapy. *JAIDS-JOURNAL OF ACQUIRED IMMUNE DEFICIENCY SYNDROMES* **84**, 101-106.
199. Shiao S, Yin MT, Strehlau R *et al.* (2020) Bone turnover markers in children living with HIV remaining on ritonavir-boosted lopinavir or switching to efavirenz. *Bone* **138**, 115500.
200. Alves Junior CAS, Martins PC, de Andrade Gonçalves EC *et al.* (2021) Association Between Body Fat Distribution Assessed by Different Techniques and Body Image Perception in HIV-Infected Children and Adolescents. *J Pediatr Nurs* **60**, e74-e79.
201. Andrade LBd, Nogueira TF, Vargas DM (2021) Height adjustment reduces occurrence of low bone mineral density in children and adolescents with HIV. *Rev Assoc Med Bras* (1992) **67**, 1240-1245.
202. Bhise S, Jain A, Savardekar L *et al.* (2021) Bone health in HIV-infected children on antiretroviral therapy: An Indian study. *Indian Journal of Sexually Transmitted Diseases and AIDS* **42**, 138-143.
203. Braithwaite K, McPherson TD, Shen YH *et al.* (2021) Bone outcomes in virally suppressed youth with HIV switching to tenofovir disoproxil fumarate. *SOUTHERN AFRICAN JOURNAL OF HIV MEDICINE* **22**.
204. de Medeiros RCdSC, da Silva TAL, de Oliveira ALV *et al.* (2021) Influence of Healthy Habits Counseling on Biochemical and Metabolic Parameters in Children and Adolescents with HIV: Longitudinal Study. *Nutrients* **13**, 3237-3237.
205. Dobe IS, Mocumbi AO, Majid N *et al.* (2021) Earlier antiretroviral initiation is independently associated with better arterial stiffness in children living with perinatally acquired hiv with sustained viral suppression in mozambique. *Southern African Journal of HIV Medicine* **22**.
206. Giacomet V, Lazzarin S, Manzo A *et al.* (2021) Body Fat Distribution and Metabolic Changes in a Cohort of Adolescents Living With HIV Switched to an Antiretroviral Regimen Containing Dolutegravir. *Pediatr Infect Dis J* **40**, 457-459.
207. Jacobson D, Liu JZ, Lindsey JC *et al.* (2021) Immune Markers and Their Association with Bone Density in Children, Adolescents, and Young Adults with Perinatally Acquired HIV. *AIDS Res Hum Retroviruses* **37**, 122-129.
208. Lindsey JC, Jacobson DL, Spiegel HM *et al.* (2021) Safety and Efficacy of 48 and 96 Weeks of Alendronate in Children and Adolescents With Perinatal Human Immunodeficiency Virus Infection and Low Bone Mineral Density for Age. *Clin Infect Dis* **72**, 1059-1063.
209. Martins IDC, Asseiceira I, Policarpo S *et al.* (2021) Nutritional status, physical activity and quality of life in children and adolescents with human immunodeficiency virus infection. *Portuguese Journal of Pediatrics* **52**, 98-106.
210. Martins PC, de Lima LRA, de Lima TR *et al.* (2021) Association between handgrip strength and bone mass parameters in HIV-infected children and adolescents. A cross-sectional study. *Sao Paulo Med J* **139**, 405-411.
211. Potterton J, Strehlau R, Shiao S *et al.* (2021) Muscle strength in young children perinatally infected with HIV who were initiated on antiretroviral therapy early. *SOUTH AFRICAN JOURNAL OF CHILD HEALTH* **15**, 107-111.
212. Rukuni R, Rehman AM, Mukwasi-Kahari C *et al.* (2021) Effect of HIV infection on growth and bone density in peripubertal children in the era of antiretroviral therapy: a cross-sectional study in Zimbabwe. *Lancet Child Adolesc Health* **5**, 569-581.
213. Shen YH, Shiao S, Strehlau R *et al.* (2021) Persistently lower bone mass and bone turnover among South African children living with well controlled HIV. *AIDS* **35**, 2137-2147.
214. Su JW, Shiao S, Arpadi SM *et al.* (2021) Switch to Efavirenz Attenuates Lipatrophy in Girls With Perinatal HIV. *JOURNAL OF PEDIATRIC GASTROENTEROLOGY AND NUTRITION* **72**, E15-E20.
215. Sudjarituk T, Bunupuradah T, Aurpibul L *et al.* (2021) Impact of Vitamin D and Calcium Supplementation on Bone Mineral Density and Bone Metabolism Among Thai Adolescents With Perinatally Acquired Human Immunodeficiency Virus (HIV) Infection: A Randomized Clinical Trial. *Clinical Infectious Diseases* **73**, 1555-1564.
216. Alves Junior CAS, Martins PC, Lima LRAd, Silva DAS (2022) What anthropometric indicators are associated with insulin resistance? Cross-sectional study on children and adolescents with diagnosed human immunodeficiency virus. *Sao Paulo Medical Journal* **140**, 94-100.
217. Chirindza N, Leach L, Mangona L *et al.* (2022) Body composition, physical fitness and physical activity in Mozambican children and adolescents living with HIV. *PLoS One* **17**, e0275963.
218. de Castro JAC, de Lima LRA, Silva DAS (2022) Bone Mineral Content Prediction by Bioelectrical Impedance Analysis in Children and Adolescents Diagnosed with HIV Infection: Comparison with Dual Energy X-ray Absorptiometry: A Cross-Sectional Study. *APPLIED SCIENCES-BASEL* **12**.
219. Dirajlal-Fargo S, Jacobson DL, Yu W *et al.* (2022) Gut Dysfunction Markers Are Associated With Body Composition in Youth Living With Perinatally Acquired Human Immunodeficiency Virus. *Clin Infect Dis* **75**, 945-952.
220. Mahtab S, Jao J, Myer L *et al.* (2022) The association between mental health and metabolic outcomes in youth living with perinatally acquired HIV in the Cape Town Adolescent Antiretroviral Cohort. *AIDS Care* **34**, 1151-1158.
221. Martins PC, Alves Junior CAS, Lima LRAd *et al.* (2022) Does antiretroviral therapy change the relationship between body composition and muscle strength in children and adolescents diagnosed with HIV? *HIV Research and Clinical Practice* **23**, 22-27.
222. Martins PC, Souza Alves Junior CA, Augustemak de Lima LR *et al.* (2022) Muscle mass indicators as fat-free mass and lean soft tissue mass are associated with handgrip strength in HIV-diagnosed children and adolescents. *J Bodyw Mov Ther* **30**, 76-81.
223. Mellin J, Le Prevost M, Kenny J *et al.* (2022) Arterial Stiffness in a Cohort of Young People Living With Perinatal HIV and HIV Negative Young People in England. *Frontiers in Cardiovascular Medicine* **9**.

|                                                                                                                                                                                                                                                                                            |
|--------------------------------------------------------------------------------------------------------------------------------------------------------------------------------------------------------------------------------------------------------------------------------------------|
| 224. Metgud DC, Chheda RJ (2022) Muscle strength, flexibility and cardiorespiratory endurance in children with human immunodeficiency virus on antiretroviral therapy: A case control study. <i>Sri Lanka Journal of Child Health</i> <b>51</b> , 560-564.                                 |
| 225. Potterton J, Strehlau R, Shiao S <i>et al.</i> (2022) Evaluation of submaximal endurance in young children living with HIV. <i>South African Journal of Physiotherapy</i> <b>78</b> , 1-6.                                                                                            |
| 226. Rego CV, Potterton JL (2022) Motor function, muscle strength and health-related quality of life of children perinatally infected with HIV. <i>S Afr J Physiother</i> <b>78</b> , 1812.                                                                                                |
| 227. Roberts JA, Shen Y, Strehlau R <i>et al.</i> (2022) Comparison of quantitative ultrasonography and dual X-ray absorptiometry for bone status assessment in South African children living with HIV. <i>PLoS One</i> <b>17</b> , e0276290.                                              |
| 228. Rose PC, Nel ED, Cotton MF <i>et al.</i> (2022) Prevalence and Risk Factors for Hepatic Steatosis in Children With Perinatal HIV on Early Antiretroviral Therapy Compared to HIV-Exposed Uninfected and HIV-Unexposed Children. <i>Front Pediatr</i> <b>10</b> , 893579.              |
| 229. Vargas DM, Daniela de Oliveira P, José Carlos Pereira G <i>et al.</i> (2022) Massa óssea em crianças e adolescentes com infecção vertical pelo HIV: uma série de casos. <i>Rev Assoc Méd Rio Gd do Sul</i> <b>66</b> , 01022105-01022105.                                             |
| 230. Zanolenci S, de Souza MC, Martins CR <i>et al.</i> (2022) Factors Correlated with Body Image Dissatisfaction in Children and Adolescents Diagnosed with HIV: A Cross-Sectional Study. <i>Int J Environ Res Public Health</i> <b>19</b> .                                              |
| 231. Zanolenci S, Martins PC, Junior CASA <i>et al.</i> (2022) Association between bone mineral density and content and physical growth parameters among children and adolescents diagnosed with HIV: a cross-sectional study. <i>Sao Paulo Medical Journal</i> <b>140</b> , 682-690.      |
| 232. Alves CAS, Augustemak De Lima LR, Franco Moreno YM, Santos Silva DA (2023) Anthropometric indicators as discriminators of high body fat in children and adolescents with HIV: comparison with reference methods. <i>Minerva Pediatrics</i> <b>75</b> , 828-835.                       |
| 233. Alves Junior CAS, Martins PC, Gonçalves ECA <i>et al.</i> (2023) Association between lipid and glycemic profile and total body and trunk fat in children and adolescents diagnosed with HIV. <i>Clin Nutr ESPEN</i> <b>53</b> , 7-12.                                                 |
| 234. Comley-White N, Ntsiea V, Potterton J (2023) Physical functioning in adolescents with perinatal HIV. <i>AIDS Care</i> , 1-10.                                                                                                                                                         |
| 235. Davies C, Vaida F, Otjombe K <i>et al.</i> (2023) Longitudinal comparison of insulin resistance and dyslipidemia in children with and without perinatal HIV infection in South Africa. <i>Aids</i> <b>37</b> , 523-533.                                                               |
| 236. Dirajlal-Fargo S, Jacobson DL, Yu W <i>et al.</i> (2023) Longitudinal changes in body fat and metabolic complications in young people with perinatally acquired HIV. <i>HIV Med</i> .                                                                                                 |
| 237. Franco-Oliva A, Pinzón-Navarro BA, Martínez-Soto-Holguín MC <i>et al.</i> (2023) High resting energy expenditure, less fat-free mass, and less muscle strength in HIV-infected children: a matched, cross-sectional study. <i>Front Nutr</i> <b>10</b> , 1220013.                     |
| 238. Gregson CL, Rehman AM, Rukuni R <i>et al.</i> (2023) Perinatal HIV infection is associated with deficits in muscle function in children and adolescents: a cross-sectional study in Zimbabwe. <i>Aids</i> .                                                                           |
| 239. IHEME GO (2023) Health-related quality of life and nutritional status of people living with HIV/AIDS in South-East Nigeria; a facility-based study. <i>Human Nutrition and Metabolism</i> <b>32</b> .                                                                                 |
| 240. Maina R, He J, Abubakar A <i>et al.</i> (2023) The effects of height-for-age and HIV on cognitive development of school-aged children in Nairobi, Kenya: a structural equation modelling analysis. <i>Front Public Health</i> <b>11</b> , 1171851.                                    |
| 241. Martins PC, de Lima LRA, Silva AM, Silva DAS (2023) Association between Phase Angle and Body Composition of Children and Adolescents Diagnosed with HIV Infection. <i>Children (Basel)</i> <b>10</b> .                                                                                |
| 242. Mukwasi-Kahari C, Rehman AM, Ó Breasail M <i>et al.</i> (2023) Impaired Bone Architecture in Peripubertal Children With HIV, Despite Treatment With Antiretroviral Therapy: A Cross-Sectional Study From Zimbabwe. <i>Journal of Bone &amp; Mineral Research</i> <b>38</b> , 248-260. |
| 243. Natukunda E, Szubert A, Otiike C <i>et al.</i> (2023) Bone mineral density among children living with HIV failing first-line anti-retroviral therapy in Uganda: A sub-study of the CHAPAS-4 trial. <i>PLoS One</i> <b>18</b> , e0288877.                                              |
| 244. Olibamoyo OB, Akintan PE, Adeniyi OF, Soriyan OO (2023) Serum vitamin E levels in children with human immunodeficiency virus infection in Lagos Nigeria. <i>Egyptian Pediatric Association Gazette</i> <b>71</b> .                                                                    |
| 245. Rehman AM, Sekitoleko I, Rukuni R <i>et al.</i> (2023) Growth Profiles of Children and Adolescents Living with and without Perinatal HIV Infection in Southern Africa: A Secondary Analysis of Cohort Data. <i>Nutrients</i> <b>15</b> .                                              |
| 246. Rukuni R, Simms V, Rehman AM <i>et al.</i> (2023) Fracture prevalence and its association with bone density among children living with HIV in Zimbabwe. <i>Aids</i> <b>37</b> , 759-767.                                                                                              |
